1 **EndophilinA-dependent coupling between activity-dependent calcium influx and**  
2 **synaptic autophagy is disrupted by a Parkinson-risk mutation**

3

4 Adekunle T. Bademosi<sup>1,2,3\*</sup>, Marianna Decet<sup>1,2,\*</sup>, Sabine Kuenen<sup>1,2\*</sup>, Carles Calatayud<sup>1,2</sup>, Jef  
5 Swerts<sup>1,2</sup>, Sandra F Gallego<sup>1,2</sup>, Nils Schoovaerts<sup>1,2</sup>, Nikolaos Louros<sup>1,4</sup>, Ella Martin<sup>5,6</sup>,  
6 Spyridoula Karamanou<sup>7</sup>, Jean-Baptiste Sibarita<sup>8</sup>, Katlijn Vints<sup>1,2,9</sup>, Natalia V. Gounko<sup>1,2,9</sup>,  
7 Frédéric A. Meunier<sup>3,10</sup>, Anastassios Economou<sup>7</sup>, Wim Versées<sup>5,6</sup>, Frederic Rousseau<sup>1,4</sup>, Joost  
8 Schymkowitz<sup>1,4</sup>, Sandra-F. Soukup<sup>11,†</sup> and Patrik Verstreken<sup>1,2,†,#</sup>

9

10 <sup>1</sup> VIB-KU Leuven Center for Brain & Disease Research, Leuven, Belgium

11 <sup>2</sup> KU Leuven, Department of Neurosciences, Leuven Brain Institute, Mission Lucidity, Leuven,  
12 Belgium

13 <sup>3</sup> Clem Jones Centre for Ageing Dementia Research, Queensland Brain Institute, The University  
14 of Queensland, St Lucia Campus, Brisbane, QLD 4072, Australia

15 <sup>4</sup> Switch Laboratory, Department of Cellular and Molecular Medicine, KU Leuven, Leuven,  
16 Belgium

17 <sup>5</sup> VIB-VUB Center for Structural Biology, Brussels, Belgium

18 <sup>6</sup> Structural Biology Brussels, Vrije Universiteit Brussel, Brussels, Belgium

19 <sup>7</sup> KU Leuven, Department of Microbiology and Immunology, Rega Institute for Medical  
20 Research, Leuven, Belgium

21 <sup>8</sup> Interdisciplinary Institute for Neuroscience, University of Bordeaux, France

22 <sup>9</sup> VIB Bio Core, KU Leuven, Belgium

23 <sup>10</sup> School of Biomedical Sciences, The University of Queensland, St Lucia Campus, Brisbane,  
24 QLD 4072, Australia

25 <sup>11</sup> Univ. Bordeaux, CNRS, UMR 5293, F-33000 BordeauxFrance

26

27 \* equal contribution

28 † co-corresponding

29 # lead contact: [patrik.verstreken@kuleuven.be](mailto:patrik.verstreken@kuleuven.be)

30

31

32

33

34

## 35 **Abstract**

36 Neuronal activity and neurotransmitter release cause use-dependent decline in protein function.  
37 However, it is unclear how this is coupled to local protein turnover and quality control  
38 mechanisms. Here we show that the endocytic protein Endophilin-A (EndoA/ENDO A1)  
39 couples activity-induced calcium influx to synaptic autophagy and neuronal survival. We  
40 identify single mutations in the EndoA flexible region that either increases EndoA diffusion  
41 and promotes autophagosome formation in the absence of calcium, or immobilizes EndoA and  
42 blocks autophagy, even in the presence of calcium. Hence, the EndoA flexible region is a switch  
43 that responds to calcium, regulating EndoA nanoscale synaptic organization and association  
44 with autophagosomes driving their formation. Interestingly, a pathogenic variant in the human  
45 ENDO A1 variable region that confers risk to Parkinson's disease (PD), also confines ENDO A1  
46 to the synaptic plasma membrane and equally blocks autophagy in flies *in vivo* and in induced  
47 human neurons. Thus, our work reveals a mechanism neurons use to connect neuronal activity  
48 to local protein turnover by autophagy, which is critical for neuronal survival.

49

50

## 51 **Introduction**

52 Presynaptic terminals are complex machines that drive a multitude of functions such as memory  
53 acquisition, complex coordinated movements and thought (Mayford et al., 2012). Synapses are  
54 densely packed with proteins and lipids (Wilhelm et al., 2014) that power essential processes  
55 such as neurotransmitter release, changes in plasticity, endocytosis, signaling, etc. (Südhof,  
56 2004; Südhof, 2013; Südhof and Malenka, 2008). Yet synapses are often located far from  
57 neuronal cell bodies and thus, nerve terminals need to, at least in part, locally cope with turnover  
58 of bio-molecules (Azarnia Tehran et al., 2018; Decet and Verstreken, 2021; Soukup et al., 2018;  
59 Vijayan and Verstreken, 2017; Wang et al., 2017).

60 There are several cellular “homeostasis mechanisms”, that are involved in quality control and  
61 protein turnover at the synapses, including macroautophagy, where double membrane  
62 structures engulf parts of the cytoplasm destined for degradation and recycling. However,  
63 synapses are fragile and it is likely they avoid “blunt” and “massive” turnover by gorging  
64 sizeable parts of their cytoplasm. For example, based on electron microscopy studies,  
65 autophagosomes can measure up to hundreds of nanometers in diameter and thus a single  
66 autophagosome could engulf up to >10-20% of the synaptic cytoplasm at once (Baba et al.,  
67 1997; Jin and Klionsky, 2014; Klionsky et al., 2021; Soukup et al., 2016; Vanhauwaert et al.,  
68 2017). Hence, it is conceivable that autophagy at synapses is a well-regulated process.

69 There are several synapse-specific proteins that are implicated in the creation of  
70 autophagosomes at nerve terminals and these same proteins are not involved in autophagy  
71 elsewhere in the cell (Azarnia Tehran et al., 2018; Decet and Verstreken, 2021; Montenegro-  
72 Venegas et al., 2020; Soukup et al., 2016; Vanhauwaert et al., 2017). This includes the active  
73 zone protein Bassoon that binds to and sequesters Atg5, thus limiting the ability to create new  
74 autophagosomes at synapses (Okerlund et al., 2017). We have also implicated Synaptojanin-1

75 that dephosphorylates phosphoinositides at the autophagosomal membrane to facilitate Atg18-  
76 cycling (Soukup et al., 2018; Vanhauwaert et al., 2017). Similarly, we found a role for EndoA1,  
77 a small BAR and SH3 domain-containing protein that, when phosphorylated by LRRK2, creates  
78 membrane docking sites for autophagic proteins such as Atg3 or Atg1 (Murdoch et al., 2016;  
79 Soukup and Verstreken, 2017; Soukup et al., 2018, 2016). While the important question of how  
80 key molecular pathways trigger autophagy at synapses is not answered, these discoveries are  
81 starting to reveal exciting connections to neurodegenerative disease that we do not yet fully  
82 understand. Indeed, the genes encoding Synaptojanin-1 and LRRK2 have been found mutated  
83 in PD. There is also a GWAS signal close to the *LRRK2* locus and two independent GWAS  
84 signals in the vicinity of the *SH3GL2* gene that encodes ENDOA1 (Daida et al., 2020; Satake  
85 et al., 2009; Simón-Sánchez et al., 2009). Interestingly, there is also a mutation in the flexible  
86 region of ENDOA1, between the BAR and SH3 domains that confers increased risk to develop  
87 PD (Germer et al., 2019). However, the effect of this mutation on EndoA function is unknown.

88 Synapses require intense metabolic activity to power the vesicle cycle and other membrane-  
89 bound processes. This also causes protein stress and damage. An interesting idea is that this  
90 stress and damage are coupled to protein- and organelle-turnover including that, across species,  
91 neuronal activity induces the formation of autophagosomes at synapses (Decet and Verstreken,  
92 2021; Hill et al., 2019; Kroemer et al., 2010; Kulkarni et al., 2021; Nakatogawa, 2020; Nixon,  
93 2013; Shehata et al., 2012; Soukup et al., 2016; Wang et al., 2015; Yang et al., 2022). However,  
94 how elements of neuronal activity such as calcium influx, neurotransmitter release or  
95 endocytosis, drive the formation of autophagosomes at synaptic terminals has not been  
96 investigated.

97 Here, we show that neuronal stimulation-induced calcium influx is necessary and sufficient to  
98 drive the formation of autophagosomes at pre-synaptic terminals. This process is mediated by  
99 ENDOA1 and blocked by the pathogenic risk variant mutation, G276V, in the flexible region  
100 of the human protein. This region controls EndoA nanoscale organization at synapses in a  
101 calcium-dependent manner, such that at rest the protein is in the periphery, where it can promote  
102 synaptic vesicle endocytosis, while during stimulation, it relocalizes to the synapse lumen to  
103 facilitate autophagosome formation. Finally, balanced EndoA-dependent and stimulation  
104 driven synaptic autophagy is required for neuronal survival. Our work reveals the impact of the  
105 ENDOA1 risk variant and suggests a critical function for synaptic autophagy in PD.

106

107

108

## 109 Results

### 110 EndoA is required for Ca<sup>2+</sup>-induced pre-synaptic autophagy

111 It is not known how neuronal activity induces autophagy at synapses (Decet and Verstreken,  
112 2021; Shehata et al., 2012; Soukup et al., 2016; Wang et al., 2015). We therefore tested if Ca<sup>2+</sup>  
113 influx induced by stimulation can trigger the process. We performed live confocal imaging of  
114 *Drosophila* third-instar larval neuromuscular junction (NMJ) boutons expressing Atg8 fused to  
115 mCherry (Atg8<sup>mCherry</sup>) under endogenous *atg8*-promotor control. Motor neurons were  
116 electrically stimulated within the range of their normal physiological firing ability (20 Hz)  
117 (Chouhan et al., 2010, 2012). 30 min of stimulation induces the formation of Atg8 positive  
118 puncta. These puncta do not form when neurons are not stimulated nor in the absence of  
119 extracellular Ca<sup>2+</sup> (Figure 1A-B', E). Likewise, Atg8 labeled structures do not form when  
120 neurons are stimulated in the presence of the membrane-permeable Ca<sup>2+</sup> chelator EGTA-AM  
121 (Figure 1C-E). We conclude that Ca<sup>2+</sup> influx upon neuronal stimulation triggers the  
122 accumulation of Atg8-labeled autophagosomes at synaptic boutons.

123 To find independent evidence for this, we used Nefiracetam (Nefi), a compound that opens  
124 L/N-type Ca<sup>2+</sup> channels (Nishizaki et al., 1998; Yoshii and Watabe, 1994; Yoshii et al., 2000).  
125 First, we confirmed that Nefiracetam causes Ca<sup>2+</sup> influx at *Drosophila* NMJ boutons using  
126 GCaMP6 imaging (Supplemental Figure 1A-B). We then incubated live NMJs with  
127 Nefiracetam and observed that this induces autophagy in the presence of extracellular Ca<sup>2+</sup>, but  
128 not when Ca<sup>2+</sup> is omitted (Figures 1F, F', H). To verify that the process induced by Nefiracetam  
129 and Ca<sup>2+</sup> is indeed autophagy, we lowered the expression of the essential autophagy protein  
130 Atg3 using the expression of Atg3 RNAi in neurons (Soukup et al., 2016). Under these  
131 conditions Nefiracetam and Ca<sup>2+</sup> do not cause Atg8<sup>mCherry</sup> to be recruited, and the marker  
132 remains cytosolic (Figure 1G-H). Hence, Ca<sup>2+</sup> influx induced by Nefiracetam induces  
133 autophagy at synapses.

134 EndoA is a synaptic protein involved in synaptic vesicle endocytosis (Milosevic et al., 2011;  
135 Ringstad et al., 1999; Schuske et al., 2003; Verstreken et al., 2002). Previous reports have  
136 suggested the protein is responsive to Ca<sup>2+</sup>, but the consequences and functional relevance of  
137 this are not known (Chen et al., 2003; Kroll et al., 2019; Yang et al., 2021; Zhang et al., 2012a).  
138 Moreover, we have previously shown that the expression of an EndoA phospho-mutant,  
139 EndoA<sup>S75A</sup> instead of wild type EndoA blocks starvation-induced synaptic autophagy (Soukup  
140 et al., 2016). We therefore wondered whether EndoA would also be required for synaptic  
141 autophagy induced by Ca<sup>2+</sup>-influx. Interestingly, application of Nefiracetam and Ca<sup>2+</sup> in  
142 EndoA<sup>S75A</sup> mutant animals did not induce synaptic autophagy (Figure 1I-K). These results  
143 indicate that EndoA is required for stimulation-induced synaptic autophagy.

144

### 145 The EndoA flexible region regulates Dynamin binding

146 Past work suggests that a negatively charged residue, E264 (in Rat ENDOA2) in the  
147 unstructured, flexible region between the BAR and SH3 domains of EndoA mediates its  
148 sensitivity to Ca<sup>2+</sup> (Zhang et al., 2012a). This amino acid is evolutionary very well conserved

149 and corresponds to D265 in *Drosophila* EndoA (Figure 2A). We mutated this residue to a  
150 neutral alanine to mimic Ca<sup>2+</sup>-unresponsiveness (EndoA<sup>D265A</sup>) and to a positively charged  
151 arginine to mimic Ca<sup>2+</sup>-induction (EndoA<sup>D265R</sup>). We expressed these mutant proteins and wild  
152 type EndoA in *E. coli*, purified them to homogeneity (Supplemental Figure 2A) and verified  
153 the integrity of our proteins by SEC-MALS (Supplemental Figure 2B). To assess if the D265  
154 mutations cause conformational changes, as speculated in literature (Chen et al., 2003; Zhang  
155 et al., 2012a), we carried out a battery of biophysical analyses, including Fourier Transform  
156 InfraRed (FTIR) spectroscopy, Dynamic Light Scattering (DLS), Small Angle X-ray Scattering  
157 (SAXS) and assessed the proteins thermal stability (Supplemental data and Supplemental  
158 Figure 2C-H). However, none of these methodologies revealed significant structural differences  
159 between the mutant and wild type proteins. This indicates that the mutant proteins retain their  
160 ability to dimerize, do not majorly affect secondary structure composition and have similar  
161 hydrodynamic radii compared to the wild type protein. Furthermore, the D265 mutations also  
162 do not cause obvious conformational rearrangements.

163 The E264 in the flexible region of rat ENDOA2 is thought to affect the binding efficiency of  
164 proteins to the EndoA-SH3 domain. We therefore assessed the ability of EndoA<sup>D265R</sup> and  
165 EndoA<sup>D265A</sup> to bind Dynamin, a well-known EndoA-interaction partner that mediates synaptic  
166 vesicle endocytosis at the plasma membrane (Ringstad et al., 1999). We found that *Drosophila*  
167 EndoA<sup>D265R</sup> binds significantly less Dynamin than EndoA<sup>WT</sup>, and that EndoA<sup>D265A</sup> binds more  
168 Dynamin than EndoA<sup>D265R</sup> (Figure 2B-B'). These findings indicate that D265 regulates the  
169 association of EndoA with Dynamin, one of its major binding partners.

170

### 171 **D265 in EndoA mediates Ca<sup>2+</sup>-induced synaptic autophagy**

172 To test if D265 mediates the Ca<sup>2+</sup> responsiveness of EndoA in autophagy, we generated  
173 transgenic flies and expressed EndoA<sup>D265A</sup>, EndoA<sup>D265R</sup> or wild type EndoA using a pan-  
174 neuronal driver (*nSyb-Gal4*) in *endoA*<sup>-/-</sup> null mutants. We show that our conditions result in  
175 very similar expression levels to endogenous EndoA expression in control animals  
176 (Supplemental Figure 3A, A') and that the proteins localize to presynaptic terminals (see  
177 below). Next, we assessed if these mutant EndoA proteins can recapitulate *in vivo* functions of  
178 the wild type protein. Unlike *endoA*<sup>-/-</sup> mutants that die as pupae, neuronal expression of  
179 EndoA<sup>D265A</sup> or EndoA<sup>D265R</sup> rescues lethality and adult flies emerge (Supplemental Figure 3B).  
180 However, most fail to expand their wings, suggesting the animals are weak (Supplemental  
181 Figure 3C-C'). Additionally, *endoA*<sup>-/-</sup> animals that express EndoA<sup>D265A</sup> or EndoA<sup>D265R</sup> are  
182 extremely uncoordinated and the animals die much earlier than *endoA*<sup>-/-</sup> mutants that express  
183 wild type EndoA (Figure 2G). Hence, these data suggest that mutations within EndoA flexible  
184 region fundamentally affect EndoA function.

185 *EndoA*<sup>-/-</sup> null mutants show a severe defect in synaptic vesicle endocytosis (Dickman et al.,  
186 2005; Guichet et al., 2002; Verstreken et al., 2002). To assess whether EndoA<sup>D265A</sup> and  
187 EndoA<sup>D265R</sup> affect synaptic vesicle cycling, we performed a FM 1-43 dye uptake assay. Larval  
188 fillets were incubated with the lipophilic dye FM 1-43, which is internalized into newly formed  
189 synaptic vesicles upon nerve stimulation (Ramaswami et al., 1994). *EndoA*<sup>-/-</sup> animals

190 expressing EndoA<sup>D265A</sup> or EndoA<sup>D265R</sup> show efficient FM 1-43 dye uptake that is similar to that  
191 measured in *endoA*<sup>-/-</sup> mutants that express wild type EndoA (Figure 2C-C'). Endocytic defects  
192 in *endoA*<sup>-/-</sup> mutants also cause a decline in neurotransmitter release during prolonged 10 Hz  
193 stimulation (Verstreken et al., 2002, 2003). To test if this response was affected in D265 mutant  
194 flies, excitatory junctional potentials (EJPs) were recorded. The EJP amplitude during low  
195 frequency stimulation (0.2 Hz-1 Hz) and during high frequency stimulation (10 Hz, 400 s) was  
196 very similar across our conditions (Figure 2D-E). Moreover, defects in endocytosis in *endoA*<sup>-/-</sup>  
197 mutants severely affect vesicle replenishment at synaptic terminals (Guichet et al., 2002;  
198 Verstreken et al., 2002, 2003). Therefore, we conducted transmission electron microscopy  
199 (TEM) to reveal the ultrastructure of NMJ boutons, but did not find significant differences in  
200 synaptic vesicle number per area (Figure 2F-F'). We conclude that the D265 EndoA mutants  
201 do not affect synaptic vesicle endocytosis in a significant manner, but cause adult flies to be  
202 uncoordinated resulting in early death (Figure 2G). This suggests that important EndoA  
203 functions, other than endocytosis, are affected by D265.

204 In light of these results, we asked if Ca<sup>2+</sup> influx-induced synaptic autophagy might be affected  
205 in EndoA<sup>D265A</sup> and EndoA<sup>D265R</sup> mutants. We determined the distribution of Atg8<sup>mCherry</sup> in the  
206 mutant animals in response to Ca<sup>2+</sup> influx. In non-induced conditions (absence of extracellular  
207 Ca<sup>2+</sup>), Atg8<sup>mCherry</sup> remains cytosolic and does not accumulate in puncta in *endoA*<sup>-/-</sup> mutants that  
208 express EndoA<sup>WT</sup> or EndoA<sup>D265A</sup> (Figure 3A-C, E). In contrast, Atg8<sup>mCherry</sup>-labeled puncta do  
209 form at uninduced NMJs of *endoA*<sup>-/-</sup> mutants that express EndoA<sup>D265R</sup> (Figure 3D-E). The  
210 autophagy levels in uninduced EndoA<sup>D265R</sup> mutants are similar to those observed in controls  
211 treated with Nefiracetam and Ca<sup>2+</sup> (induced), indicating that autophagy is constitutively induced  
212 in EndoA<sup>D265R</sup> mutants (Figure 3E). Conversely, Atg8<sup>mCherry</sup> puncta fail to be formed at induced  
213 NMJs of *endoA*<sup>-/-</sup> mutants that express EndoA<sup>D265A</sup>, indicating that in this mutant autophagy is  
214 blocked (Figure 3A'-D', E).

215 To reveal the ultrastructure of the Atg8<sup>mCherry</sup>-labeled structures, we resorted to correlative light  
216 and electron microscopy (CLEM). First, we imaged by confocal microscopy Atg8<sup>mCherry</sup> puncta  
217 in NMJs of *endoA*<sup>-/-</sup> animals that express EndoA<sup>D265R</sup> and used a two-photon laser to create  
218 branding marks around the region of interest. We used these to identify relevant boutons in  
219 block face scanning EM and processed the samples for imaging by TEM. We then manually  
220 overlaid confocal light microscopy sections with the TEM images (Soukup et al., 2016). We  
221 found that the Atg8<sup>mCherry</sup> puncta overlap with structures reminiscent of degradative organelles  
222 including lysosomes and autophagosomes (Figure 3F-K). This confirms the  
223 autophagosome/degradative nature of the Atg8<sup>mCherry</sup> labeled organelles that form in  
224 EndoA<sup>D265R</sup> animals. Taken together, these results indicate that EndoA D265 mutants are  
225 unresponsive to Ca<sup>2+</sup>-influx and that EndoA<sup>D265R</sup> constitutively induces autophagy at synapses,  
226 while EndoA<sup>D265A</sup> is inert and fails to induce the process even upon Ca<sup>2+</sup> influx.

227

## 228 **Ca<sup>2+</sup> influx affects the nanoscale organization of EndoA at synapses**

229 To understand how these EndoA mutants differentially affect autophagy at synapses, we  
230 determined the localization of wild type and mutant EndoA proteins at live synapses with and

231 without induction by Nefiracetam and  $\text{Ca}^{2+}$ . We took advantage of the nanoscale resolution  
232 provided by the Airy scan detector in confocal laser-scanning microscopy (Huff, 2015).  $\text{Ca}^{2+}$   
233 influx causes a redistribution of endogenous EndoA or EndoA<sup>WT</sup> neuronally expressed in  
234 *endoA*<sup>-/-</sup> mutants (single confocal slices in Figure 4A-F). Wild type EndoA moves from its  
235 preferential peripheral localization towards the synaptic bouton lumen (Figures 4A–A', C–C'  
236 G). Interestingly, EndoA<sup>D265A</sup> remains mostly at the bouton periphery even upon  $\text{Ca}^{2+}$  influx  
237 (Figure 4B–B', E, G). Conversely, EndoA<sup>D265R</sup> is distributed across the bouton already at rest  
238 (Figure 4D–G). In contrast to wild type EndoA, the distribution of EndoA<sup>D265A</sup> or EndoA<sup>D265R</sup>  
239 does not change upon  $\text{Ca}^{2+}$ -influx, confirming these mutants are  $\text{Ca}^{2+}$  insensitive. We next asked  
240 whether the redistribution of EndoA would cause increased localization of the protein close to  
241 Atg8<sup>mCherry</sup> labeled autophagosomes. We therefore expressed Atg8<sup>mCherry</sup> and quantified the  
242 amount of EndoA in the 100 nm zone around specified Atg8<sup>mCherry</sup> puncta. As predicted, EndoA  
243 localizes more in the proximity of Atg8<sup>mCherry</sup> labeled structures in response to  $\text{Ca}^{2+}$  influx and  
244 when harboring the D265R mutation. Conversely, significantly less EndoA localizes around  
245 (rare) Atg8<sup>mCherry</sup> labeled structures in unstimulated boutons, or upon expression of EndoA<sup>D265A</sup>  
246 (Figure 4H–H'). These data suggest that increased  $\text{Ca}^{2+}$  influx enables EndoA re-distribution,  
247 including to synaptic autophagosomes.

248 To further understand the movements of EndoA at the bouton periphery we resorted to  
249 photoactivated localization microscopy (PALM) under oblique illumination that was developed  
250 for *Drosophila* NMJs (Bademosi et al., 2017, 2018; Vanhauwaert et al., 2017). This technology  
251 allows the tracking of proteins tagged with photoconvertible fluorescent probes at <50 nm  
252 resolution and within 200–400 nm proximity to the synaptic plasma membrane (Tokunaga et  
253 al., 2008). We tagged wild type, EndoA<sup>D265A</sup> and EndoA<sup>D265R</sup> mutants with mEOS3.1 and  
254 expressed the proteins in *endoA*<sup>-/-</sup> mutants. mEOS is a photoconvertible fluorescent protein  
255 whose stochastic change in emission spectrum from green to red allows for single molecule  
256 localization (Manley et al., 2008; Zhang et al., 2012b). Animals were or were not stimulated  
257 with Nefiracetam and  $\text{Ca}^{2+}$ , fixed and analyzed by PALM (Supplementary Figure 4A–A'').  
258 Interestingly, wild type EndoA<sup>WT::mEos3.1</sup> organizes in 'hot-spots' or 'nanometer-sized cluster of  
259 proteins – nanodomains' at the bouton periphery (Supplementary Figure 4A''). These  
260 EndoA<sup>WT::mEos3.1</sup> nanodomains are significantly smaller when NMJs are stimulated or when  
261 imaging EndoA<sup>D265R::mEos3.1</sup> as compared to unstimulated samples or when imaging  
262 EndoA<sup>D265A::mEos3.1</sup> (Figure 4I'–K', Supplemental Figure 4B–D'). Our data are consistent with  
263 the idea that EndoA<sup>D265A</sup> interacts with other proteins in the periphery including Dynamin  
264 (Figure 2B–B') and is thus more confined within larger nanodomains located juxtamembrane,  
265 while EndoA<sup>D265R</sup> is more localized to the synaptic lumen and thus away from the nanodomains  
266 (Figure 4D–D', G).

267 Finally, we characterized the re-arrangements of EndoA in nanodomains upon  $\text{Ca}^{2+}$  influx using  
268 live single particle tracking PALM (sptPALM) (Supplemental Figure 5A–B') (Manley et al.,  
269 2008). We incubated NMJs with Nefiracetam and  $\text{Ca}^{2+}$  and tracked individual EndoA<sup>WT::mEos3.1</sup>,  
270 EndoA<sup>D265A::mEos3.1</sup> or EndoA<sup>D265R::mEos3.1</sup> molecules (neuronally expressed in *endoA*<sup>-/-</sup>) and  
271 plotted their trajectory map (Figure 4L–N; Supplemental Video 1). We first confirmed the  
272 existence of EndoA-nanodomains at the bouton periphery using the high-resolved intensity  
273 maps that are generated during the sptPALM processing (Supplemental Figure 5C–C'). Then,

274 we assessed the mobility behavior of EndoA in these nanodomains by analyzing the mean  
275 square displacement (MSD) of the single proteins within the nanodomains. This parameter  
276 reveals the level of confinement of motion. Upon  $\text{Ca}^{2+}$  influx, EndoA<sup>D265A::mEos3.1</sup> is  
277 significantly more confined within these nanodomains than EndoA<sup>WT::mEos3.1</sup> or  
278 EndoA<sup>D265R::mEos3.1</sup> (Figure 4O-P). We reach a similar conclusion when analyzing the  
279 instantaneous diffusion coefficients of EndoA across entire NMJs, revealing increased mobility  
280 of EndoA<sup>WT::mEos3.1</sup> in response to  $\text{Ca}^{2+}$  influx, while EndoA<sup>D265R::mEos3.1</sup> and EndoA<sup>D265A::mEos3.1</sup>  
281 are insensitive (Supplemental Figure 5D-F'''). Mechanistically, these results indicate that the  
282 D265A mutation confines EndoA in nanodomains at the bouton periphery and that  $\text{Ca}^{2+}$ -influx  
283 alters the diffusion of the wild type protein to localize to the bouton lumen.

284

### 285 **EndoA D265 mutations cause neurodegeneration**

286 Having characterized the involvement of EndoA in synaptic autophagy, we turned to examine  
287 its potential implication in neurodegeneration as defects in autophagy are frequently connected  
288 to these disorders. We specifically tested if defects in stimulation-induced synaptic autophagy  
289 lead to neuronal demise by assessing neuronal integrity in *endoA*<sup>-/-</sup> mutants expressing  
290 EndoA<sup>D265R</sup>, EndoA<sup>D265A</sup> or EndoA<sup>WT</sup>. We started by placing animals for 3 or 7 days in constant  
291 dark to avoid retinal stimulation and then used these animals to record electroretinograms  
292 (ERGs). ERGs measure the depolarization of photoreceptors in response to a brief (1 s) light  
293 pulse. When photoreceptor neurons degenerate, the amplitude of this depolarization is reduced  
294 (Chouhan et al., 2016; Soukup et al., 2016; Wang and Montell, 2007). While the amplitude of  
295 depolarization in 3-day-old and 7-day-old control and EndoA<sup>D265A</sup> mutant flies is similar,  
296 EndoA<sup>D265R</sup> already show a clear age-dependent reduction in ERG amplitude when kept in dark  
297 conditions (Figure 5A, A', C, C', E, E', G, G', I). We also placed the flies in constant light to  
298 cause light-induced stress and repeated this experiment. While control and *endoA*<sup>-/-</sup> flies  
299 expressing EndoA<sup>WT</sup> are fine, now both *endoA*<sup>-/-</sup> flies expressing EndoA<sup>D265A</sup> and EndoA<sup>D265R</sup>  
300 show strongly reduced ERG depolarization amplitudes (Figure 5A'', C'', E'', G'', I), a hallmark  
301 of neurodegeneration. To further corroborate these findings we also evaluated neuronal  
302 morphology in toluidine blue-stained retinal sections. Quantification of the number of intact  
303 ommatidia with 7 visible photoreceptors validated the ERG data and also shows age-dependent  
304 degeneration in 7-day old dark-reared EndoA<sup>D265R</sup>-expressing flies and in EndoA<sup>D265R</sup>- and  
305 EndoA<sup>D265A</sup>-expressing flies kept for 7 days in constant light (Figure 5B-H'', J). These data  
306 further indicate that expression of EndoA<sup>D265R</sup> is a more severe condition than EndoA<sup>D265A</sup>, but  
307 that both EndoA<sup>D265R</sup> and EndoA<sup>D265A</sup> cause neurodegeneration. They also provide evidence  
308 that a tight balance of stimulation-induced autophagy under control of EndoA is critical for  
309 neuronal survival.

310

### 311 **A Parkinson's disease risk variant in *SH3GL2* impairs $\text{Ca}^{2+}$ -induced synaptic autophagy**

312 There are several lines of human genetic evidence that indicate a role for ENDOA1 in the  
313 development of PD. There are two independent GWAS signals in the vicinity of the *SH3GL2*  
314 gene that encodes ENDOA1 (Alfradique-Dunham et al., 2021; Chang et al., 2017; Germer et



315 al., 2019; Nalls et al., 2019). Furthermore, there is a risk-conferring missense mutation in the  
316 *SH3GL2* gene of PD patients (Germer et al., 2019) that encodes a Glycine to Valine transition  
317 at position 276 in the flexible region of ENDOA1. Given the proximity of G276V to the  
318 autophagy-controlling D265 position (E264 in ENDOA1) (Figure 6A), we speculated that this  
319 risk mutation might also affect Ca<sup>2+</sup> influx-induced synaptic autophagy.

320 We first verified that the G276V mutation in human ENDOA1 does not destabilize the protein.  
321 We produced recombinant ENDOA1<sup>WT</sup> and ENDOA1<sup>G276V</sup> and analyzed them by SAXS. This  
322 indicates that there are no large conformational differences between them (Supplemental Figure  
323 6A) and that the proteins are both well-folded (Supplemental Figure 6B). Next, we generated  
324 *endoA*<sup>-/-</sup> flies expressing human ENDOA1<sup>WT</sup> and ENDOA1<sup>G276V</sup> pan-neuronally. Western blot  
325 analysis confirms the proteins are expressed at similar levels (Supplemental Figure 6C-C') and  
326 they are localized to synapses (see below). We also assessed synaptic vesicle endocytosis by  
327 measuring the uptake of FM 1-43 during stimulation. Consistent with the other tested mutations  
328 in the flexible region, we found no significant difference (Supplemental Figure 6D-D').  
329 Together, these results indicate that the G276V mutation does not destabilize ENDOA1, that  
330 human ENDOA1 can functionally replace *Drosophila* EndoA when expressed in flies and that  
331 the G276V mutation does not affect synaptic vesicle endocytosis under the tested conditions.

332 To test if Ca<sup>2+</sup> influx-induced autophagy is affected by the G276V pathogenic mutation, we  
333 quantified the number of Atg8<sup>Cherry</sup> puncta upon induction by Ca<sup>2+</sup> influx. While *endoA*<sup>-/-</sup>  
334 mutants expressing wild type human ENDOA1<sup>WT</sup> show a significant increase in Atg8<sup>Cherry</sup>-  
335 labeled autophagosomes upon induction (Figure 6B-B', D), ENDOA1<sup>G276V</sup> expressing animals  
336 fail to upregulate autophagy even when induced (Figure 6C-D). We next also tested the  
337 localization of the human protein at *Drosophila* synapses using Airy scan confocal imaging.  
338 While Ca<sup>2+</sup>-influx causes ENDOA1<sup>WT</sup> to redistribute from the periphery to a more luminal  
339 localization (Figure 6E-E', G), ENDOA1<sup>G276V</sup> remains confined to the periphery (Figure 6F-  
340 G). Collectively these data indicate that the G276V mutation in ENDOA1 impairs Ca<sup>2+</sup> influx-  
341 induced synaptic autophagy.

342 To assess the validity of our result in human cells, we investigated the role of the ENDOA1<sup>G276V</sup>  
343 mutation in induced human dopaminergic neurons. Therefore, we generated ENDOA1<sup>G276V</sup>  
344 homozygous knock-in mutations by CRISPR/Cas9-facilitated homologous recombination in  
345 Ctrl65 "wild type" (Baumann et al., 2021) induced pluripotent stem cells (iPSCs) (Figure 7A-  
346 A', Supplemental Figure 7A-B). Then, ventral midbrain dopaminergic neurons (vmDAn) were  
347 produced using an optimized protocol for midbrain floor plate differentiation (Supplemental  
348 Figure 7C). Terminal differentiation *in vitro* until day 55-60 ultimately yields ~50% of TH-  
349 positive neurons for both unedited and ENDOA1<sup>G276V</sup> mutant cells (Figure 7B-B'). Finally, we  
350 assessed autophagy by quantifying the number of LC3B puncta (by antibody labeling) within  
351 TH-labeled neurites. This antibody labels lipidated LC3, the human orthologue of Atg8a  
352 (Klionsky et al., 2021; Martinet et al., 2013). We observed significantly less autophagosomes  
353 in ENDOA1<sup>G276V</sup> mutant vmDAn compared to control neurons (Figure 7C-C'). These results  
354 support the conclusion that the PD risk-conferring variant ENDOA1<sup>G276V</sup> impairs autophagy  
355 in neurites of induced vmDAn.

356

357

## 358 **Discussion**

359 This work reveals that EndoA links neuronal activity-dependent  $\text{Ca}^{2+}$  influx to synaptic  
360 autophagy and that a human mutation conferring risk to PD disrupts this process.

361 Synapses require regulated turnover systems to maintain protein homeostasis and disrupting  
362 this process causes synaptic and -ultimately- neuronal degeneration (Soukup et al., 2016;  
363 Vanhauwaert et al., 2017; Vijayan and Verstreken, 2017). There are several reasons why  
364 synapses are vulnerable, including that they need to cope with metabolically demanding  
365 processes, such as the synaptic vesicle cycle that is fueled by mitochondrial energy generation,  
366 thus causing the production of damaging ROS (Verstreken et al., 2005). Synapses are also often  
367 located at relatively long distances from neuronal cell bodies, imposing logistics problems that  
368 include the need to transport degradative organelles along long axons (Wang et al., 2020).  
369 Finally, individual synaptic boutons are fragile and uncontrolled autophagy could cause the  
370 (unwanted) engulfment of large parts of the cytoplasm, disrupting homeostasis. We propose  
371 that by coupling the activation of synaptic autophagy to neuronal activity, protein and organelle  
372 turnover are activated to maintain a healthy and functional synapse.

373 In this paper, we find that  $\text{Ca}^{2+}$  influx at stimulated synapses induces autophagosome formation.  
374 Work in AIY neurons in *C. elegans* also show a correlation between an increase in  
375 autophagosome formation and  $\text{Ca}^{2+}$  waves (Hill et al., 2019), suggesting this is a universal  
376 mechanism. The  $\text{Ca}^{2+}$  that induces synaptic autophagy upon stimulation appears to be largely  
377 derived from extracellular sources, as the L/N-type  $\text{Ca}^{2+}$  channel agonist Nefiracetam and the  
378 availability of extracellular  $\text{Ca}^{2+}$  promote the process (Nishizaki et al., 1998; Yoshii and  
379 Watabe, 1994; Yoshii et al., 2000). However, contributions from intracellular sources, such as  
380 ER- $\text{Ca}^{2+}$ , are not excluded or could further tune the process (Kuijpers et al., 2021).

381 Mechanistically, we provide evidence that EndoA is critically required to relay this  $\text{Ca}^{2+}$  signal.  
382 *In vitro* work found a negatively charged residue at position 264 in the flexible region of rat  
383 ENDOA2 that is involved in regulating the  $\text{Ca}^{2+}$ -dependent association of EndoA with binding  
384 partners at the plasma membrane, including Dynamin and voltage-gated  $\text{Ca}^{2+}$  channels (Chen  
385 et al., 2003; Zhang et al., 2012a; Kroll et al., 2019). We confirm this is the case for fly EndoA,  
386 but based on several biophysical methods, we do exclude large-scale  $\text{Ca}^{2+}$ -induced  
387 conformational changes in EndoA. This is in agreement with recent data that also exclude direct  
388 binding of  $\text{Ca}^{2+}$  to EndoA (Yang et al., 2021) and leaves open the possibility that other, as of  
389 yet unidentified, intermediary partners could be needed. Nonetheless, our data clearly show that  
390 mutating the negatively charged residue of EndoA (D265 in flies) eliminates the protein's  
391 proper response to  $\text{Ca}^{2+}$ . Our data also indicate that  $\text{Ca}^{2+}$  regulates the mobility of EndoA in  
392 plasma-membrane nanodomains (this could be through binding the endocytic factor Dynamin)  
393 and its localization with nascent autophagosomes in the synapse lumen. Based on our results,  
394 we propose a model where under normal conditions, EndoA supports endocytic processes at  
395 the plasma membrane (Milosevic et al., 2011; Ringstad et al., 1999; Verstreken et al., 2002;  
396 Watanabe et al., 2018), and that  $\text{Ca}^{2+}$  influx at synapses liberates a (limited) pool of EndoA

397 from nanodomains to drive synaptic autophagy. As only a fraction of EndoA re-localizes to the  
398 synapse lumen, leaving a large enough amount of protein at the membrane, both EndoA<sup>D265R</sup>  
399 and EndoA<sup>D265A</sup> can support endocytosis. The liberation of the EndoA-pool for autophagy  
400 appears a neuron- and synapse-specific process because KCl stimulation of chromaffin cells  
401 causes redistribution of EndoA towards the plasma membrane, suggesting a different  
402 mechanism is at play in these cells (Gowrisankaran et al., 2020).

403 The early stages of neurodegenerative diseases are associated with synaptic failure (Burke and  
404 O'Malley, 2013; Caminiti et al., 2017; Delva et al., 2020; Soukup et al., 2018). In PD, there is  
405 strong genetic evidence pointing to synaptic dysfunction and several proteins mutated in PD  
406 are enriched at synapses (eg. alpha-synuclein) and/or play essential roles in synaptic function  
407 (eg. DNAJC6 and Synj1) (Krebs et al., 2013; Krüger et al., 1998; Olgiati et al., 2016;  
408 Polymeropoulos et al., 1997; Proukakis et al., 2013; Quadri et al., 2013; Zarranz et al., 2004).  
409 Similarly, ENDOA1 is emerging as a key protein in PD and this is supported by human genetics:  
410 there are GWAS signals in the vicinity of the *SH3GL2* locus (Nalls et al., 2019) and there is the  
411 mutation associated with increased risk to PD in the open reading frame that we modelled here  
412 (Chang et al., 2017; Germer et al., 2019). We report that this PD risk mutation in ENDOA1  
413 does not strongly affect synaptic vesicle endocytosis, but it does block synaptic autophagy.  
414 Excitingly, this role of EndoA in synaptic autophagy may be a central node in PD (Soukup et  
415 al., 2018) that includes Synj1 (that binds EndoA), LRRK2 (that phosphorylates EndoA) and  
416 possibly Parkin (that ubiquitinates EndoA) (Kitada et al., 1998; Krebs et al., 2013; Matta et al.,  
417 2012; Olgiati et al., 2014; Paisán-Ruiz, 2009). Mutations in each of these proteins causes  
418 alterations in autophagic function (Oliveira et al., 2015; Schöndorf et al., 2014; Soukup et al.,  
419 2016; Vanhauwaert et al., 2017; Yue et al., 2015) and also analyses of post-mortem tissue of  
420 PD patients found autophagy defects (Alvarez-Erviti et al., 2010; Murphy et al., 2015; Tanji et  
421 al., 2011). The exact function of the interactions between these PD-related proteins in pathology  
422 has not been elucidated. However, our finding that the PD risk mutant ENDOA1<sup>G276V</sup> blocks  
423 stimulation-induced synaptic autophagy is an important piece in this puzzle and indicates the  
424 important role of synaptic autophagy in PD pathogenicity.

425

426

427

428

## 429 STAR Methods

### 430 Contact for Reagent and Resource Sharing

431 Further information and requests for resources and reagents should be directed to the Lead  
432 Contact Patrik Verstreken ([patrik.verstreken@kuleuven.be](mailto:patrik.verstreken@kuleuven.be)). Human control iPSC line  
433 (SFC065) was used in accordance with an MTA with the University of Lübeck (Germany).

434

### 435 Experimental Model and Subject Details

#### 436 Fly stocks and maintenance

437 Flies were grown on standard cornmeal and sugar beet syrup medium at 25 °C. The *Drosophila*  
438 wild type and mutant (D265A, D265R) cDNA of EndophilinA, as well as human wild-type and  
439 mutant (G276V) SH3GL2 were cloned into the pUAST-attB vector and flies generated by in-  
440 house embryo injection or at Bestgene Inc into the VK37 locus to establish *UAS-EndoA<sup>WT</sup>*,  
441 *UAS-EndoA<sup>D264A</sup>*, *UAS-EndoA<sup>D264R</sup>*, *UAS-SH3GL2<sup>WT</sup>*, *UAS-SH3GL2<sup>G276V</sup>* lines and the  
442 mEOS3.1 tagged lines. Genomic *w<sup>+</sup>;Atg8<sup>3×mCherry</sup>* (hereafter *Atg8<sup>mCherry</sup>*) flies were a gift from  
443 Gabor Juhasz (Hegedus et al., 2016).

444

#### 445 iPSC maintenance and differentiation

446 iPSC from a control line (SFC065) and *SH3GL2* p.G276V knock-in line were differentiated  
447 into ventral midbrain dopaminergic neurons as described in the methods section. Briefly, hiPSC  
448 were maintained on matrigel-coated plates with mTeSR-Plus medium (Stem Cell  
449 Technologies) and medium changes were performed every two days. At day 18 of  
450 differentiation, neural progenitors were plated on coverslips coated with poly-D-lysine and  
451 mouse laminin in terminal differentiation medium.

452

453

### 454 Method details

#### 455 Genotypes

456 The following genotypes were used:

457 *w<sup>\*</sup>;UAS-endoA<sup>WT</sup>/+;endoA<sup>26</sup>/endoA<sup>Δ4</sup>,GMR57C10-GAL4* (where *GMR57C10-Gal4* is referred  
458 to as *nSyb-Gal4*)

459 *w<sup>\*</sup>;UAS-endoA<sup>D265A</sup>/+;endoA<sup>26</sup>/endoA<sup>Δ4</sup>,GMR57C10-GAL4*

460 *w<sup>\*</sup>;UAS-endoA<sup>D265R</sup>/+;endoA<sup>26</sup>/endoA<sup>Δ4</sup>,GMR57C10-GAL4*

461 *w<sup>\*</sup>;GMR57C10-GAL4/+;*

462 *w<sup>\*</sup>;; endoA<sup>26</sup>/endoA<sup>Δ4</sup>*

463 *w<sup>1118</sup>CS*  
464 *w<sup>1118</sup>; genomic Atg8<sup>3×mCherry</sup>/+*  
465 *w\*; genomic endoA<sup>S75A</sup>/+; endoA<sup>26</sup>/EndoA<sup>Δ4</sup>, genomic Atg8<sup>3×mCherry</sup>*  
466 *w\*; UAS-RNAi-Atg3/GMR57C10-GAL4; genomic Atg8<sup>3×mCherry</sup>/+*  
467 *w\*; UAS-endoA<sup>WT</sup>/GMR57C10-GAL4; endoA<sup>26</sup>/EndoA<sup>Δ4</sup>, genomic Atg8<sup>3×mCherry</sup>*  
468 *w\*; UAS-endoA<sup>D265A</sup>/GMR57C10-GAL4; endoA<sup>26</sup>/endoA<sup>Δ4</sup>, genomic Atg8<sup>3×mCherry</sup>*  
469 *w\*; UAS-endoA<sup>D265R</sup>/GMR57C10-GAL4; endoA<sup>26</sup>/endoA<sup>Δ4</sup>, genomic Atg8<sup>3×mCherry</sup>*  
470 *w\*; UAS-SH3GL2<sup>WT</sup>/GMR57C10-GAL4; endoA<sup>26</sup>/endoA<sup>Δ4</sup>, genomic Atg8<sup>3×mCherry</sup>*  
471 *w\*; UAS-SH3GL2<sup>G276V</sup>/GMR57C10-GAL4; endoA<sup>26</sup>/endoA<sup>Δ4</sup>, genomic Atg8<sup>3×mCherry</sup>*  
472 *w\*; UAS-SH3GL2<sup>WT</sup>/+; endoA<sup>26</sup>/endoA<sup>Δ4</sup>, GMR57C10-GAL4*  
473 *w\*; UAS-SH3GL2<sup>G276V</sup>/+; endoA<sup>26</sup>/endoA<sup>Δ4</sup>, GMR57C10-GAL4<sub>w</sub>; GMR57C10-Gal4/+;*  
474 *genomic Atg8<sup>3×mCherry</sup>/+*  
475 *w\*; UAS-GCaMP6m/+; GMR57C10-GAL4/+*  
476 *w\*; UAS-endoA<sup>WT</sup>, cn bw/cn bw; endoA<sup>26</sup>/longGMR-GAL4*  
477 *w\*; UAS-endoA<sup>D254A</sup>, cn bw/cn bw; endoA<sup>26</sup>/longGMR-GAL4*  
478 *w\*; UAS-endoA<sup>D254R</sup>, cn bw/cn bw; endoA<sup>26</sup>/longGMR-GAL4*  
479 *w\*; cn bw/cn bw; longGMR-GAL4/+*  
480 *w\*; UAS-mEOS3.1::endoA<sup>WT</sup>/+; endoA<sup>26</sup>/endoA<sup>Δ4</sup>, GMR57C10-GAL4*  
481 *w\*; UAS-mEOS3.1::endoA<sup>D265A</sup>/+; endoA<sup>26</sup>/endoA<sup>Δ4</sup>, GMR57C10-GAL4*  
482 *w\*; UAS-mEOS3.1::endoA<sup>D265R</sup>/+; endoA<sup>26</sup>/endoA<sup>Δ4</sup>, GMR57C10-GAL4*

483

#### 484 **Primers, gBlocks and Oligos**

485 - pUAST\_EndoA-WT

486 FW EndoA WT for UAS: ACTCTGAATAGGGAATTGGGATGGCTTTCGCCGGACTCAA  
487 AAAGC

488 Rc EndoA WT for UAS: AAAGATCCTCTAGAGGTACCCCTAGTTGCCATTGGGCAGG

489 Gibson Assembly with EndoA PCR fragment and pUAST\_attB linearized with EcoRI and XhoI

490 - pUAST\_EndoA-D265R

491 EndoA D265R gBlock

492 ACTCTGAATAGGGAATTGGGCAAAATGGCTTTCGCCGGACTCAAAAAGCAGATC  
493 AACAAGGCCAACCAGTATATGACGGAGAAGATGGGCGGTGCCGAGGGCACCAAA

494 CTGGACATGGACTTCATGGAGATGGAACGCAAGACGGACGTCACCGTGGAGCTA  
495 GTGGAGGAGCTGCAGCTAAAGACGAAGGAGTTCCTGCAGCCGAATCCAACGGCA  
496 CGGGCCAAAATGGCAGCGGTCAAGGGCATCTCGAAGCTGTCCGGACAGGCCAAG  
497 TCCAATACGTATCCGCAACCGGAGGGCCTGCTCGCGGAATGCATGCTGACTTATG  
498 GGAAGAAGCTCGGCGAGGACAACAGCGTGTTTCGCGCAGGCGCTCGTCGAATTCG  
499 GCGAAGCGCTGAAACAGATGGCCGACGTCAAGTATTCGCTGGACGACAACATCA  
500 AGCAGAACTTTTTGGAGCCACTGCATCATATGCAGACCAAAGACCTCAAGGAGGT  
501 AATGCATCATCGCAAGAAGCTGCAGGGCCGGCGGCTAGACTTTGACTGCAAGCG  
502 TCGCCGACAGGCCAAGGACGATGAGATTCGTGGTGCCGAGGACAAGTTCGGTGA  
503 ATCGCTCCAGCTGGCCAGGTGGGCATGTTCAATTTGCTCGAGAACGATACGGAG  
504 CATGTCTCCAGCTGGTCACCTTTGCCGAGGCACTATACGATTTTCATTTCGCAATG  
505 CGCGGATGTCCTTCGAGGCCTGCAGGAGACACTGCAGGAGAAGCGCTCCGAGGC  
506 GGAGAGCCGGCCACGCAACGAGTTCGTGCCCAAGACGCTGCTCGATCTGAACTTG  
507 cgCGGCGGTGGCGGCGGCCTCAACGAAGATGGCACGCCGTCTCACATTAGTTTCGA  
508 GCGCCTCGCCGTTGCCCTCGCCGATGCGTTCGCCCGCCAAGTCGATGGCCGTAAC  
509 GCCGCAGCGCCAGCAGCAGCCCTGCTGCCAGGCCCTCTACGACTTCGAGCCGGAG  
510 AATCCCGGCGAACTGGCCTTCAAGGAGAACGACATTATCACCTGTTGAATCGCG  
511 TCGACGACAATTGGTTCGAGGGCGCGGTGAATGGCCGCACCGGTTACTTCCCGCA  
512 GTCGTATGTTTCAGGTGCAGGTGCCCTGCCCAATGGCAACTAGGGGTACCTCTAG  
513 AGGATCTTT

514 Gibson Assembly with EndoA D265R gBlock and pUAST\_attB linearized with EcoRI and  
515 XhoI

516 - pUAST\_EndoA-D265A

517 EndoA D264A gBlock

518 ACTCTGAATAGGGAATTGGGATGGCTTTCGCCGGACTCAAAAAGCAGATCAACA  
519 AGGCCAACCAGTATATGACGGAGAAGATGGGCGGTGCCGAGGGCACCAAACCTGG  
520 ACATGGACTTCATGGAGATGGAACGCAAGACGGACGTCACCGTGGAGCTAGTGG  
521 AGGAGCTGCAGCTAAAGACGAAGGAGTTCCTGCAGCCGAATCCAACGGCACGGG  
522 CAAAATGGCAGCGGTCAAGGGCATCTCGAAGCTGTCCGGACAGGCCAAGTCCA  
523 ATACGTATCCGCAACCGGAGGGCCTGCTCGCGGAATGCATGCTGACTTATGGGAA  
524 GAAGCTCGGCGAGGACAACAGCGTGTTTCGCGCAGGCGCTCGTCGAATTCGGCGA  
525 AGCGCTGAAACAGATGGCCGACGTCAAGTATTCGCTGGACGACAACATCAAGCA  
526 GAACTTTTTGGAGCCACTGCATCATATGCAGACCAAAGACCTCAAGGAGGTAATG  
527 CATCATCGCAAGAAGCTGCAGGGCCGGCGGCTAGACTTTGACTGCAAGCGTCCGC  
528 GACAGGCCAAGGACGATGAGATTCGTGGTGCCGAGGACAAGTTCGGTGAATCGC  
529 TCCAGCTGGCCAGGTGGGCATGTTCAATTTGCTCGAGAACGATACGGAGCATGT  
530 CTCCCAGCTGGTCACCTTTGCCGAGGCACTATACGATTTTCATTTCGCAATGCGCGG  
531 ATGTCCTTCGAGGCCTGCAGGAGACACTGCAGGAGAAGCGCTCCGAGGCGGAGA  
532 GCCGGCCACGCAACGAGTTCGTGCCCAAGACGCTGCTCGATCTGAACTTGGcCGG  
533 CGGTGGCGGCGGCCTCAACGAAGATGGCACGCCGTCTCACATTAGTTCGAGCGCC  
534 TCGCCGTTGCCCTCGCCGATGCGTTCGCCCGCCAAGTCGATGGCCGTAACGCCGC  
535 AGCGCCAGCAGCAGCCCTGCTGCCAGGCCCTCTACGACTTCGAGCCGGAGAATCC

536 CGGCGAACTGGCCTTCAAGGAGAACGACATTATCACCTGTTGAATCGCGTCGAC  
537 GACAATTGGTTCGAGGGCGCGGTGAATGGCCGCACCGGTTACTTCCCGCAGTCGT  
538 ATGTTTCAGGTGCAGGTGCCCTGCCCAATGGCAACTAGGGGTACCTCTAGAGGAT  
539 CTTT

540 Gibson Assembly with EndoA D265A gBlock and pUAST\_attB linearized with EcoRI and  
541 XhoI

542 pUAST\_EndoA-WT-mEOS3.1-v5, pUAST\_EndoA-D265R-mEOS3.1-v5, pUAST\_EndoA-  
543 D265A-mEOS3.1-v5 were made by respectively performing a restriction digest on  
544 pUAST\_EndoA-WT, pUAST\_EndoA-D264R, pUAST\_EndoA-D265A with AgeI and XbaI  
545 and doing a Gibson assembly with:

546 gBlock mEOS3.1

547 GAGGGCGCGGTGAATGGCCGCACCGGTTACTTCCCGCAaTCGTATGTTTCAGGTGC  
548 AGGTtCCCCTtCCCAATGGCAACGGTGGGGGTACgGGAGGCGGATCCATGAGTGCG  
549 ATTAAGCCAGACATGAAGATCAAACCTCCGTATGGAAGGCAACGTAAACGGGCAC  
550 CACTTTGTGATCGACGGAGATGGTACAGGCAAGCCTTTTGAGGGAAAACAGAGT  
551 ATGGATCTTGAAGTCAAAGAGGGCGGACCTCTGCCTTTTGCCTTTGATATCCTGA  
552 CCACcGCATTCCATTACGGCAACAGGGTATTCGCCAAATATCCAGACAACATACA  
553 AGACTATTTTAAGCAGTCGTTTCCTAAGGGGTATTCGTGGGAACGAAGCTTGACT  
554 TTCGAAGACGGGGGCATTTGCAACGCCAGAAACGACATAACAATGGAAGGGGAC  
555 ACTTTCTATAATAAAGTTCGATTTTATGGTACCAACTTTCCCGCCAATGGTCCAGT  
556 TATGCAGAAGAAGACGCTGAAATGGGAGCCCTCCACTGAGAAAATGTATGTGCG  
557 TGATGGAGTGCTGACGGGTGATATTGAGATGGCTTTGTTGCTTGAAGGAAATGCC  
558 CATTACCGATGTGACTTCAGAACTACTTACAAAGCTAAGGAGAAGGGTGTCAAGT  
559 TACCAGGCGCCCACTTTGTGGACCACTGCATTGAGATTTTAAGCCATGACAAAGA  
560 TTACAACAAGGTTAAGCTGTATGAGCATGCTGTTGCTCATTCTGGATTGCCTGAC  
561 AATGCCAGACGAGGaGGaGGTACCGGAGGtGGcTCCGGCAAGCCCATCCCCAACCC  
562 CCTGCTGGGCCTGGATAGCACCTAGAGGATCTTTGTGAAGGAACCTTAC

563 All plasmids contain the EndoA CDS (WT or mutation), a short flexible linker (GGTGGG),  
564 mEOS3.1, again a short flexible linker (GGTGGG) and a V5 epitope tag.

565 - pUAST\_SH3GL2-WT

566 SH3GL2 WT gBlock

567 AACTCTGAATAGGGAATTGGGCAAAAATGTCGGTGGCCGGCCTCAAGAAGCAGT  
568 TCCATAAAGCCACTCAGAAAGTGAGTGAGAAGGTTGGAGGAGCTGAAGGAACCA  
569 AGCTAGATGATGACTTCAAAGAGATGGAAAGGAAAGTGGATGTCACCAGCAGGG  
570 CTGTGATGGAAATAATGACTAAAACAATTGAATACCTTCAACCCAATCCAGCTTC  
571 CAGAGCTAAGCTCAGCATGATCAACACCATGTCAAAAATCCGTGGCCAGGAGAA  
572 GGGGCCAGGCTATCCTCAGGCAGAGGGCCTGCTGGCAGAGGCCATGCTCAAATTT  
573 GGAAGAGAGCTTGGAGATGATTGCAACTTTGGCCCAGCACTTGGTGAGGTTCGGG  
574 GAGGCCATGCGGGAAGTGTTCGGAGGTCAAAGACTCTTTGGACATAGAAGTGAAG  
575 CAGAACTTCATTGACCCTCTTCAGAATCTTCATGACAAAGATCTTAGGGAAATTC

576 AACATCATCTAAAGAAGTTGGAGGGTCGACGCCTGGATTTTGATTATAAGAAGAA  
577 ACGACAAGGCAAGATTCCGGATGAAGAGCTTCGTCAAGCTCTAGAGAAATTTGA  
578 TGAGTCTAAGGAAATTGCTGAGTCAAGCATGTTCAATCTCTTGGAGATGGATATT  
579 GAACAAGTGAGCCAGCTCTCTGCACTTGTGCAAGCTCAGCTGGAGTACCACAAGC  
580 AGGCAGTCCAGATCCTGCAGCAAGTCACGGTCAGACTGGAAGAAAGAATAAGAC  
581 AGGCTTCATCTCAGCCTAGAAGGGAATATCAACCTAAACCACGAATGAGCCTGG  
582 AGTTTCCAACCTGGAGACAGTACTCAGCCCAATGGGGGTCTCTCCACACAGGCAC  
583 TCCCAAACCTTCAGGTGTCCAAATGGATCAGCCgTGCTGCCGAGCTCTGTACGACT  
584 TTGAACCTGAAAATGAAGGGGAGTTGGGATTTAAAGAGGGGCGATATCATCACAC  
585 TACTAACCAAATTGATGAGAAGTGGTATGAGGGGATGCTGCATGGCCATTCAGG  
586 CTCTTCCCATCAATTATGTGGAAATTCTGGTTGCCCTGCCCCATTAGGGGTACC  
587 TCTAGAGGATCTTTG

588 Gibson Assembly with SH3GL2 WT gBlock and pUAST\_attB linearized with EcoRI and XhoI

589 - pUAST\_SH3GL2-G276V

590 SH3GL2 G276V gBlock

591 AACTCTGAATAGGGAATTGGGCAAAAATGTCGGTGGCCGGCCTCAAGAAGCAGT  
592 TCCATAAAGCCACTCAGAAAGTGAGTGAGAAGGTTGGAGGAGCTGAAGGAACCA  
593 AGCTAGATGATGACTTCAAAGAGATGGAAAGGAAAGTGGATGTCACCAGCAGGG  
594 CTGTGATGGAAATAATGACTAAAACAATTGAATACCTTCAACCCAATCCAGCTTC  
595 CAGAGCTAAGCTCAGCATGATCAACACCATGTCAAAAATCCGTGGCCAGGAGAA  
596 GGGGCCAGGCTATCCTCAGGCAGAGGCGCTGCTGGCAGAGGCCATGCTCAAATTT  
597 GGAAGAGAGCTTGGAGATGATTGCAACTTTGGCCCAGCACTTGGTGAGGTCGGG  
598 GAGGCCATGCGGGAAGTGTGCGGAGGTCAAAGACTCTTTGGACATAGAAGTGAAG  
599 CAGAACTTCATTGACCCTCTTCAGAATCTTCATGACAAAGATCTTAGGGAAATTC  
600 AACATCATCTAAAGAAGTTGGAGGGTCGACGCCTGGATTTTGATTATAAGAAGAA  
601 ACGACAAGGCAAGATTCCGGATGAAGAGCTTCGTCAAGCTCTAGAGAAATTTGA  
602 TGAGTCTAAGGAAATTGCTGAGTCAAGCATGTTCAATCTCTTGGAGATGGATATT  
603 GAACAAGTGAGCCAGCTCTCTGCACTTGTGCAAGCTCAGCTGGAGTACCACAAGC  
604 AGGCAGTCCAGATCCTGCAGCAAGTCACGGTCAGACTGGAAGAAAGAATAAGAC  
605 AGGCTTCATCTCAGCCTAGAAGGGAATATCAACCTAAACCACGAATGAGCCTGG  
606 AGTTTCCAACCTGGAGACAGTACTCAGCCCAATGGGGtTCTCTCCACACAGGCAC  
607 CCCAAACCTTCAGGTGTCCAAATGGATCAGCCgTGCTGCCGAGCTCTGTACGACTT  
608 TGAACCTGAAAATGAAGGGGAGTTGGGATTTAAAGAGGGGCGATATCATCACACT  
609 CACTAACCAAATTGATGAGAAGTGGTATGAGGGGATGCTGCATGGCCATTCAGGC  
610 TTCTTCCCATCAATTATGTGGAAATTCTGGTTGCCCTGCCCCATTAGGGGTACCT  
611 CTAGAGGATCTTTG

612 Gibson Assembly with SH3GL2 G276V gBlock and pUAST\_attB linearized with EcoRI and  
613 XhoI

614 pGEX-6P-1\_EndoA-WT, pGEX-6P-1\_EndoA-D265A and pGEX-6P-1\_EndoA-D265R were  
615 generated by performing a PCR respectively from pUAST\_EndoA-WT, pUAST\_EndoA-  
616 D265A and pUAST\_EndoA-D265R with the following primers:



617 FW: TTCTGTTCCAGGGGCCCTGGGATCCATGGCTTTCGCCGGACTC

618 Rc: GCGGCCGCTCGAGTCGACCCGGGCTAGTTGCCATTGGGCAG

619 Gibson assembly was performed with the PCR fragments and pGEX-6P-1 linearized with  
620 BamHI and EcoRI

621 - pGEX-6P-1\_SH3GL2-WT

622 SH3GL2 WT gBlock: the sequence was codon optimized for expression in E.coli

623 TTCTGTTCCAGGGGCCCTGGGATCCATGAGCGTCGCAGGCCTGAAGAAGCAGTT  
624 CCATAAGGCTACTCAGAAGGTTTCGGAAAAAGTAGGTGGGGCTGAGGGCACCAA  
625 GTTAGACGACGACTTTAAGGAAATGGAAAGAAAAGTCGATGTCACGAGTAGAGC  
626 GGTTATGGAAATTATGACGAAGACCATAGAGTATTTGCAGCCGAATCCCGCCAGT  
627 CGTGCCAAGTTGAGCATGATCAATACGATGTTCGAAAATTCGCGGGCAGGAAAAA  
628 GGACCGGGATACCCTCAAGCAGAGGCGCTTCTTGCAGAGGCCATGTTAAAATTTG  
629 GGCGCGAGCTTGGAGATGACTGCAATTTTGGCCCAGCTTTAGGGGAGGTTGGTGA  
630 GGCAATGAGAGAGTTATCCGAAGTCAAGGATTCCCTGGACATTGAGGTTAAGCA  
631 GAACTTTATAGATCCACTTCAAATTTGCACGATAAAGACCTGCGTGAGATTCAA  
632 CATCACTTAAAGAAGTTAGAAGGACGCCGCCTTGACTTTGATTATAAGAAAAAGC  
633 GTCAGGGCAAATACCCGACGAAGAACTTCGCCAAGCTCTGGAGAAGTTTGATG  
634 AGAGCAAGGAAATAGCTGAAAGTTCGATGTTTAATTTGCTGGAGATGGATATTGA  
635 ACAAGTAAGTCAGTTATCTGCGTTAGTACAGGCCCAATTAGAATATCACAAACAG  
636 GCTGTGCAAATATTACAACAGGTAACCGTACGTTTGGAGGAGAGAATACGTCAG  
637 GCATCGTCTCAGCCTCGCCGCGAATACCAACCGAAACCACGCATGTCGCTTGAGT  
638 TCCCCACAGGAGACTCAACCCAACCTAACGGAGGCTTGTACATACGGGCACACC  
639 CAAGCCGAGCGGAGTTCAGATGGACCAGCCGTGCTGTAGAGCACTGTATGATTTT  
640 GAGCCGGAGAACGAGGGTGAGCTTGGGTTCAAGGAGGGGGATATTACTCTT  
641 ACTAATCAGATTGATGAGAATTGGTACGAGGGGATGCTTCATGGTCATTTCGGGCT  
642 TTTTCCCTATAAATTACGTCGAGATTCTGGTGGCGCTGCCACACTAGCCCGGGTCG  
643 ACTCGAGCGGCCGCATCGTGACTGACTGAC

644 Gibson assembly performed with codon optimized SH3GL2 WT gBlock and pGEX-6P-1  
645 linearized with BamHI and EcoRI

646 - pGEX-6P-1\_SH3GL2-G267V

647 SH3GL2 G276V gBlock: the sequence was codon optimized for expression in E.coli

648 TTCTGTTCCAGGGGCCCTGGGATCCATGAGCGTCGCAGGCCTGAAGAAGCAGTT  
649 CCATAAGGCTACTCAGAAGGTTTCGGAAAAAGTAGGTGGGGCTGAGGGCACCAA  
650 GTTAGACGACGACTTTAAGGAAATGGAAAGAAAAGTCGATGTCACGAGTAGAGC  
651 GGTTATGGAAATTATGACGAAGACCATAGAGTATTTGCAGCCGAATCCCGCCAGT  
652 CGTGCCAAGTTGAGCATGATCAATACGATGTTCGAAAATTCGCGGGCAGGAAAAA  
653 GGACCGGGATACCCTCAAGCAGAGGCGCTTCTTGCAGAGGCCATGTTAAAATTTG  
654 GGCGCGAGCTTGGAGATGACTGCAATTTTGGCCCAGCTTTAGGGGAGGTTGGTGA  
655 GGCAATGAGAGAGTTATCCGAAGTCAAGGATTCCCTGGACATTGAGGTTAAGCA

656 GAACTTTATAGATCCACTTCAAATTTGCACGATAAAGACCTGCGTGAGATTCAA  
657 CATCACTTAAAGAAGTTAGAAGGACGCCGCCTTGACTTTGATTATAAGAAAAAGC  
658 GTCAGGGCAAAATACCCGACGAAGAACTTCGCCAAGCTCTGGAGAAGTTTGATG  
659 AGAGCAAGGAAATAGCTGAAAGTTCGATGTTTAATTTGCTGGAGATGGATATTGA  
660 ACAAGTAAGTCAGTTATCTGCGTTAGTACAGGCCCAATTAGAATATCACAAACAG  
661 GCTGTGCAAATATTACAACAGGTAACCGTACGTTTGGAGGAGAGAATACGTCAG  
662 GCATCGTCTCAGCCTCGCCGCGAATACCAACCGAAACCACGCATGTCGCTTGAGT  
663 TCCCCACAGGAGACTCAACCCAACCTAACGGAGTCTTGTCACATACGGGCACACC  
664 CAAGCCGAGCGGAGTTCAGATGGACCAGCCGTGCTGTAGAGCACTGTATGATTC  
665 GAGCCGGAGAACGAGGGGTGAGCTTGGGTTCAAGGAGGGGGATATTACTCTT  
666 ACTAATCAGATTGATGAGAATTGGTACGAGGGGGATGCTTCATGGTCATTTCGGGCT  
667 TTTTCCCTATAAATTACGTCGAGATTCTGGTGGCGCTGCCACACTAGCCCGGGTCCG  
668 ACTCGAGCGGCCGCATCGTGACTGACTGAC

669 Gibson assembly performed with codon optimized SH3GL2 G276V gBlock and pGEX-6P-1  
670 linearized with BamHI and EcoRI

671 To generate G276V knock-in iPSCs the following Oligos and gRNAs were used:

672 ssODN\_G276V\_AvaII:

673 cgaatgagcctgGAGttccaactggagacagtactcagcccaatggCgtCctctccacacaggcactcccaaacttcaggtaa  
674 gagctgaaactgca

675 px\_SH3GL2\_G276V\_gRNA1\_Fwd: CACCGTGTGTGGGAGAGACCCCAT

676 px\_SH3GL2\_G276V\_gRNA1\_Rv: aaacATGGGGGTCTCTCCCACACAc

677 SH3GL2(G276V)\_pRR\_Fwd: tatcaacctaaaccacgaatgagcctggagttccaactggagACGT

678 SH3GL2(G276V)\_pRR\_Rv: TCAGCCCAATGGGGGTCTCTCCCACACAGGCACTAGCT

679 PCR validation of the edited clones were carried out with the following primers:

680 SH3GL2\_V-sp\_Rv: gcctgtgtgggagagGacg

681 SH3GL2\_Exon8\_Rv: agtttctacctgacaactgactcc

682 SH3GL2\_T7\_Fwd: catgtagcatggtgggtgac

683

#### 684 **Autophagy induction assays**

685 Third instar larvae (still crawling in the food) expressing Atg<sup>8<sup>mCherry</sup></sup> were dissected in fresh  
686 Ca<sup>2+</sup>-free HL3 (100 mM NaCl, 5 mM KCl, 10 mM NaHCO<sub>3</sub>, 5 mM Hepes, 30 mM sucrose, 5  
687 mM trehalose and 10 mM MgCl<sub>2</sub>, pH 7.2).

688 For electrical stimulation the nerves of dissected larvae were cut just below the ventral nerve  
689 cord, and axons innervating segments A3 and A4 were stimulated at 20 Hz for 30 min at 50 %  
690 above the threshold using a suction electrode (Soukup et al., 2016). During electrical

691 stimulation, larvae were incubated in HL3 supplemented with or without 1 mM CaCl<sub>2</sub>, as  
692 indicated. EGTA-AM (Thermo Fisher) was used at 25 μM (in anhydrous 0.1 % DMSO).

693 For calcium channel agonist treatment larvae were prepared as for electrical stimulation and  
694 then incubated for 30 min in HL3 with 10 μM of Nefiracetam (Tocris), dissolved in 0,0025 %  
695 anhydrous DMSO (Yoshii and Watabe, 1994; Yoshii et al., 2000), and with or without 1 mM  
696 CaCl<sub>2</sub>. 100 μM of NAS was similarly used to prevent muscle contractions.

697 In all experiments 100 μM 1-Naphthylacetyl spermine trihydrochloride – NAS (Sigma) was  
698 added (Levitan et al., 2007; Soukup et al., 2016) to prevent muscle contractions.

699

## 700 **Confocal Live Imaging and quantification**

701 Live imaging of dissected larvae was carried out on a Nikon A1R confocal microscope with a  
702 60X (NA 1.0) water-dipping lens. Dissected larvae were washed multiple times in HL3 prior to  
703 imaging. NIS Elements (Nikon) was used for data acquisition using the Resonant Scanning  
704 option, with a zoom factor of 3 and line averaging of 16. All images were acquired with a  
705 pinhole of one Airy unit and a resolution of 1024 × 1024. Z-stacks were used in data acquisition  
706 to capture fluorescence (puncta presence) across the whole NMJ. Low basal autophagy levels  
707 were always confirmed in control experiments.

708 Quantification of the number of puncta within synaptic boutons was performed in ImageJ  
709 (Soukup et al., 2016). Atg8<sup>3×mCherry</sup> puncta were manually counted and this was combined with  
710 the application of a threshold mask as to determine the area of the bouton. Trafficking  
711 autophagosomes (punctae in motor neuron axons outside the NMJ) were excluded from data  
712 analysis. The conditions were blinded for quantification.

713

## 714 **Calcium imaging**

715 Third instar larvae expressing GCaMP6m in neurons (GMR57C10-GAL4) were dissected in  
716 fresh HL3 and nerves cut below the ventral nerve cord. After dissection, HL3 was replaced with  
717 freshly prepared 100 μM Nas (Sigma) and 2 mM CaCl<sub>2</sub> in HL3. Larval filets were imaged on  
718 an widefield Nikon Eclipse FN1 upright microscope equipped with a water dipping 20X lens  
719 (NA 0.95) and a GFP filter. Time-lapse images were acquired at a frequency of 5 Hz.  
720 Nefiracetam or DMSO (control) was added during imaging. Image analysis was performed  
721 using ImageJ. GCaMP6m intensity was plotted as  $\Delta F/F_0$  and measured, after background  
722 subtraction, by normalizing the signal, within the synaptic boutons, in each frame to the  
723 averaged GCaMP6m intensity, for the same region of interest, of the first 10 frames.

724

## 725 **Immunohistochemistry and confocal imaging**

726 Third instar larvae were dissected in cold Ca<sup>2+</sup> free HL3 and fixed for 20 minutes at room  
727 temperature with 4 % para-formaldehyde. Fixed larvae were permeabilized with 0.4 % PBX  
728 (TritonX-100 in 1X PBS), blocked for 1 hour with 10 % normal goat serum in PBX and

729 incubated overnight at 4°C with primary antibodies. After several washes, larval filets were  
730 incubated with secondary antibodies for 90 min at room temperature. Samples were mounted  
731 in Vectashield (Vector Laboratories).

732 The following antibodies were used: guinea pig anti-EndoA (GP69) [1:2000 (Verstreken et al.,  
733 2002)], rabbit anti-HRP [1:1000 (Jackson ImmunoResearch)], anti-SH3GL2 [1:1000  
734 (GeneTex)]. Alexa Fluor-488/Alexa Fluor-555 conjugated secondary antibodies [1:1000  
735 (Invitrogen)].

736 Samples were imaged on a Nikon A1R confocal microscope with a 60X (NA 1.4) oil lens.  
737 Acquisition performed using a resonant scanner, a zoom factor of 3 and line averaging of 16.  
738 All images were acquired with a pinhole of 1 Airy unit and a resolution of 1024 × 1024. Z-  
739 stacks (step intervals of 0.45 μm) were used in data acquisition and the same image settings  
740 were maintained across the genotypes. Quantification of fluorescent intensity and NMJ area  
741 was performed with ImageJ.

742 For the characterization of iPSCs and midbrain floor plate progenitors, cells were fixed at day  
743 16 of differentiation for 15 min in 4 % para-formaldehyde. Cells were blocked for 1 h at room  
744 temperature with 3 % normal goat serum + 0.3 % Triton X-100 (Sigma) in DPBS supplemented  
745 with Ca<sup>2+</sup> and Mg<sup>2+</sup> (Life Technologies). Primary antibodies were incubated overnight at 4°C  
746 in blocking solution. Secondary antibodies were incubated for 1 h at room temperature in  
747 blocking solution. Coverslips were mounted in Mowiol (Sigma) and imaged on an upright  
748 Nikon A1R confocal microscope equipped with a DIC N2 20X lens (NA 0.75). Z-stacks were  
749 acquired with pinhole of 1 Airy unit, a Galvano scanner with line averaging of 2, image size of  
750 1024 x 1024 pixels and step intervals of 2 μm (for imaging of iPSCs) and 0.5 μm (for imaging  
751 of midbrain floor plate progenitors).

752 For the quantification of autophagy induction, terminally differentiated vmDAn (55-60 days)  
753 were fixed for 15 min in 4 % para-formaldehyde and blocked for 1 h at room temperature in 3  
754 % normal goat serum + 0.01 % Saponin (Sigma) in DPBS supplemented with with Ca<sup>2+</sup> and  
755 Mg<sup>2+</sup> (Life Technologies). Primary antibodies were diluted in blocking solution and incubated  
756 overnight at 4°C, while secondary antibodies were incubated for 1 h at room temperature.  
757 Coverslips were mounted with Mowiol (Sigma) and imaged on an upright Nikon A1R confocal  
758 microscope equipped with an oil immersion Apo 60X lens with (NA 1.4). Z-stacks were  
759 acquired with a pinhole of 1 Airy unit, a Galvano scanner with line averaging of 2, image size  
760 of 1024 x 1024 pixels and step intervals of 0.3 μm.

761 The following antibodies were used: mouse IgG1 anti-SOX2 [1:200 (Santa Cruz)], rabbit anti-  
762 OCT4 [1:50 (Abcam)], mouse IgG1 anti-NANOG [1:50 (Santa Cruz)], rabbit anti-LMX1A/B  
763 [1:1000 (Millipore)], mouse IgG2a anti-FOXA2 [1:250 (Santa Cruz)], mouse IgG1 anti-  
764 Engrailed-1 [1:100 (DSHB, 4G11)], mouse IgG2a anti-OTX2 [1:100 (Santa Cruz)], Rabbit  
765 anti-LC3B [1:250 (Cell Signaling)], mouse IgG2a anti-TH [1:500 (Santa Cruz)], Chicken anti-  
766 MAP2 [1:500 (Abcam)], mouse IgG1 anti-alpha-Tubulin [1:500 (DSHB 12G10)], Alexa Fluor-  
767 488/ Alexa Fluor-555/ Alexa Fluor-647 conjugated secondary antibodies [1:500 (Invitrogen)].

768

## 769 **Zeiss Airyscan Confocal Imaging and quantification**

770 A Zeiss LSM 880 (AiryScan detector enabled) with a 63X (NA 1.4) was used to image the  
771 distribution of EndoA (WT, D264A and D264R) across the NMJ. Zen Black software (2012,  
772 Carl Zeiss) was used for image acquisition and processing.

773 To quantify the distribution of EndoA within boutons, we selected boutons of similar size as  
774 previously described (Kasprowicz et al., 2014). These were then rescaled to a standard diameter  
775 and average the labelling intensities per position along the bouton diameter were defined.  
776 Boutons were resized to a width of 500 pixels, and integrated intensity was calculated for whole  
777 boutons fit into a 400 pixel diameter, while cytosol integrated intensity was calculated by 250  
778 pixel diameter circle (in ImageJ). The average integrated intensity was calculated across all  
779 boutons of the same genotype.

780

## 781 **Single-particle tracking photoactivated localization microscopy (sptPALM)**

782 SptPALM was carried out on transgenic EndophilinA-mEOS3.1 (wild-type, D264A and  
783 D264R) expressing *Drosophila* third-instar larvae which were dissected on a PDMS (Sylgard)  
784 base as previously described (Bademosi et al., 2017, 2018; Vanhauwaert et al., 2017). Briefly,  
785 EndoA<sup>WT::mEos3.1</sup>, EndoA<sup>DA::mEos3.1</sup> and EndoA<sup>DR::mEos3.1</sup> were imaged at the larvae synaptic  
786 boutons on muscle 13 of segments A3 and A4 using total internal reflection (TIRF) microscopy  
787 under slightly oblique illumination. The dissected larvae were inverted onto glass-bottomed  
788 imaging dishes (MatTek Corporation). The larvae were perfused with HL3, or a solution  
789 mixture of HL3, 10  $\mu$ M Nefiracetam, 100  $\mu$ M NAS and 1 mM CaCl<sub>2</sub>. Acquisition of single  
790 EndoA-mEOS3.1 molecules was carried out using a C-Apochromat 63X (NA 1.2) water  
791 objective on the ELYRA PS.1 microscope (Zeiss). Synaptic boutons were located using 488  
792 nm laser illumination. A 405 nm laser was used for photoconversion, and the 561 nm laser was  
793 used during acquisition. To spatially visualize and temporally characterize individual  
794 photoconverted fluorophores, the 405 nm laser was used at 0.00003-0.03 % power, while the  
795 561 nm laser was used at 20 % power. A sensitive electron-multiplying charge-coupled device  
796 (EMCCD) camera (Evolve, Photomertic) was used to collect single molecule fluorescence. Zen  
797 Black acquisition software (2012 version, Carl Zeiss) was utilized for movie acquisition. 15,000  
798 frames images were captured per synaptic bouton at a frame capture rate of 20 Hz. Analysis of  
799 sptPALM movies is described in the Supplemental Experimental Procedure.

800

## 801 **sptPALM Analysis**

802 NIH ImageJ was used to convert movies from Zen's CZI format to the format recognizable for  
803 the image analysis software – Tiff format. PALM-Tracer, a customized-written software plugin  
804 in Metamorph (Molecular Devices) (Kechkar et al., 2013; Nair et al., 2013) was used to localize  
805 single molecules and quantify their mobility. Mobility data was plotted as mean square  
806 displacement ( $\mu\text{m}^2$ ) values (equation 1) as well as diffusion coefficient ( $\mu\text{m}^2 \text{ s}^{-1}$ ) values  
807 (equation 2). The parameters were set to isolate and recognize trajectories of molecules  
808 undergoing free cytosolic diffusion, associated with organelles or bound to presynaptic plasma

809 membrane. Only fluorescent molecules with sufficient threshold and with consecutive  
810 appearance across eight movie frames were tracked and used for data analysis. The PALM-  
811 Tracer software generated trajectory maps, super-resolved average intensity as well as diffusion  
812 coefficient maps. The colour gradient in the trajectory maps indicate the time of detection of  
813 the tracks; the blue trajectories indicate molecules detected early during movie acquisition,  
814 while the white trajectories indicate later appearance and detection.

$$815 \quad MSD(n \times \Delta t) = \sum_{i=1}^{N-n} \frac{[x((i+n) \times \Delta t) - x(i \times \Delta t)]^2 + [y((i+n) \times \Delta t) - y(i \times \Delta t)]^2}{N-n} \quad (1)$$

$$816 \quad MSD(\tau) = a + 4D\tau \quad (2)$$

817  $N$  is the number of data points in a trajectory,  $\Delta t$  is the time interval of each frame,  $x$  and  $y$  are  
818 the coordinates of a particle,  $a$  is the offset constant which incorporates the effects of  
819 localization error and finite camera exposure, and  $D$  is the diffusion coefficient. The MSD was  
820 calculated for the time interval  $\tau = n\Delta t$  for the entire duration of each trajectory. The first eight  
821 points of the MSD were averaged over all trajectories and plotted against time.

822 The diffusion coefficient,  $D$ , ( $\mu\text{m}^2/\text{second}$ ) was calculated for each trajectory, from linear fits  
823 of the first four points of the MSD versus time function using equation. The diffusion coefficient  
824 ( $D$ ) distribution was sorted into two populations, immobile and mobile. The immobile  
825 population of molecules explore an area inferior to that defined by the spatial resolution within  
826 one frame. The  $D_{\text{threshold}} = 0.0316 \mu\text{m}^2/\text{s}$  was calculated as previously described (Constals et al.,  
827 2015). The immobile population was composed of molecules with a  $D$  value lower than  $0.0316$   
828  $\mu\text{m}^2/\text{s}$ , while the mobile population was composed of molecules with  $D$  values above  $0.0316$   
829  $\mu\text{m}^2/\text{s}$ .

830 The Robust regression and Outlier (ROUT) outlier test on Graph Pad Prism was used to identify  
831 and remove outliers. Relative frequency distribution graphs and average MSD curves were  
832 obtained using Graph Prism (version 6.0).

833

### 834 **Single-Molecule Localization Microscopy and Cluster Analysis**

835 EndoA<sup>::mEos3.1</sup> expressing larvae were dissected in either HL3 with Nefiracetam and NAS with  
836 or without 1 mM  $\text{CaCl}_2$  and then fixed with 4 % para-formaldehyde. Single-molecule  
837 localization was carried out on an ELYRA PS.1 microscope (Zeiss). Each dataset was acquired  
838 at a rate of 20 Hz for a duration of 20,000 frames by which point the mEOS3.1-tagged molecule  
839 were fully photoconverted. Coordinates of individual localizations were retrieved from each  
840 time-lapse video using Zen software (Zeiss). The datasets were corrected for  $x,y$  drift using  
841 Zen's automated fiducial markers and affine transform algorithms. Localizations that appeared  
842 within 1 frame and 1 pixel of each other were consolidated to account for individual fluorophore  
843 blinking. Density-based spatial clustering of applications with noise (DBSCAN) analyses, a  
844 spatial clustering algorithm based on density, was used to quantify the clustering of proteins  
845 (Ester et al., 1996). DBSCAN identifies clusters in large datasets of localization coordinates by  
846 a continuous and propagative method that links components of a common cluster based on two

847 parameters,  $r$ , and  $\epsilon$ . Where  $r$  is the search radius and  $\epsilon$  is the minimum number of neighbouring  
848 localizations within the search radius. Localizations outside the search radius and neighbouring  
849 points were classified as noise. The DBSCAN was implemented in Python.

850

### 851 **Transmission Electron Microscopy (TEM)**

852 Third instar larvae were dissected in cold HL3 and processed for transmission electron  
853 microscopy as previously described (Lauwers et al., 2018). Briefly, larval fillets were fixed in  
854 fresh 4 % para-formaldehyde (Electron Microscopy Sciences) and 1 % glutaraldehyde (Sigma)  
855 in 1 mM  $MgCl_2$  (Sigma) and 0.1 M Na-cacodylate (Sigma) buffer, pH 7.2, overnight at 4°C.  
856 Samples were washed with 0.1 M Na-cacodylate, pH 7.4 and osmicated with 2 % osmium  
857 ( $OsO_4$ /Na-Cacodylate buffer). Next, tissue was stained with 2 % uranyl acetate (Electron  
858 Microscopy Sciences) for 1.5 h and embedded in Agar 100 resin (Agar Scientific). Horizontal  
859 ultrathin sections (70 nm) were collected. Synaptic boutons were examined and imaged using  
860 a JEM-1400 transmission electron microscope (Jeol) at 80 keV.

861

### 862 **Correlative Light Electron Microscopy (CLEM)**

863 Correlative light and electron microscopy (CLEM) was performed as previously described  
864 (Soukup et al., 2016). Third instar larvae were dissected in cold HL3 and fixed for 2 h at 4°C  
865 (0.5 % glutaraldehyde, 2 % para-formaldehyde in 0.1 M PBS, pH 7.4). After washing in 0.1 M  
866 PBS, samples were stained with DAPI (Sigma). Pre-fixed larval fillets were then branded using  
867 a Zeiss LSM 780 equipped with a Mai Tai HP DeepSee laser (Spectra-Physics) at 880 nm with  
868 40 % maximal power output. Z-stacks of the ROI were acquired before and after branding  
869 with a 25X water immersion lens (NA 0.8). Samples were then post-fixed (4 % para-  
870 formaldehyde, 2.5 % glutaraldehyde in 0.1 M phosphate buffer) overnight at 4°C. The larvae  
871 were washed with 0.1 M PBS and afterwards with ddH<sub>2</sub>O. During the rest of the preparation  
872 the larvae were washed after every step with ddH<sub>2</sub>O until the dehydration steps. Branded larvae  
873 were then osmicated for 1 h (1 %  $OsO_4$  and 1.5 % potassium ferrocyanide). Then, the larvae  
874 were incubated in a 0.2 % tannic acid for 30 min followed by a second osmication step (1 %  
875  $OsO_4$  for 30 min) and subsequently put for 20 min in 1 % thiocarbohydrazide. The larvae were  
876 osmicated for a third time (1 %  $OsO_4$  for 30 min) and incubated overnight in 0.5 % uranyl  
877 acetate. Samples were then stained with lead aspartate (Walton's lead aspartate: 20 mM lead  
878 nitrate in 30 mM sodium aspartate, pH 5.5) for 30 min at 60°C. After a final washing step the  
879 larvae were dehydrated with solutions of increasing ethanol concentration (30 %, 50 %, 70 %, 80  
880 90 % and twice with 100 %) followed by two 10 min incubation steps with propylene oxide  
881 (PO). Larval fillets were then infiltrated with resin agar 100 (Laborimpex), flat embedded in  
882 resin agar 100 and placed at 60°C for 48 h.

883 For 3D-SEM, the flat resin-embedded larval fillets were cropped into 1 mm<sup>2</sup> pieces with region  
884 of interest in the middle and mounted on an aluminium specimen pin (Gatan) using conductive  
885 epoxy (Circuit Works). For approaching the region of interest, aluminium pins were placed in  
886 a Zeiss Sigma VP SEM equipped with Gatan 3View technology. Once the first branding marks

887 were reached and muscle morphology was recognized by correlating with the light microscopy  
888 data, 70 nm sections were cut on an ultramicrotome (EM UC7, Leica) and collected on slot grids  
889 (Van Loenen Instruments). The sections were imaged using a JEM-1400 transmission electron  
890 microscope (Jeol) at 80 kV. Branding marks around the NMJ and DAPI signal were used to  
891 correlate the confocal images with the TEM micrographs of the NMJ boutons. Overlay images  
892 were generated using ImageJ and Gimp.

893

#### 894 **FM 1-43**

895 The labeling and quantification of FM1-43 intensities was performed as previously described  
896 (Verstreken et al., 2008). Third instar larvae were dissected in fresh Ca<sup>2+</sup> free HL3, nerves were  
897 cut and larvae subsequently incubated for 1 min in HL3 with 4 μM FM 1-43 (Invitrogen), 1.5  
898 mM CaCl<sub>2</sub> and 90 mM KCl. Multiple steps of washing with HL3 before imaging removed the  
899 non-internalized dye. Images of FM 1-43 were captured with an upright widefield microscope  
900 (Nikon Eclipse FN1), fitted with 60X (NA 1.0) water dipping lens and stored using NIS  
901 elements. Mean bouton intensities were determined, after background subtraction, using  
902 ImageJ.

903

#### 904 **Electrophysiology**

905 Current clamp experiments to record EJPs were performed as previously described  
906 (Kasprovicz et al., 2014; Slabbaert et al., 2016). Third instar larvae were dissected in Ca<sup>2+</sup> free  
907 HL3 which was subsequently replaced with HL3 with 2 mM CaCl<sub>2</sub> and nerves were cut below  
908 the ventral nerve cord. Motor nerves from muscle 6-7, segment A2 or A3 were stimulated at 10  
909 Hz for 400s at least 50 % above the threshold, using a suction electrode. EJP sets were omitted  
910 when the recording did not hold its basal membrane potential throughout the 400 s stimulation  
911 paradigm. Signals were amplified using the Axoclamp900A amplifier (Molecular Devices),  
912 filtered using a 1 kHz Bessel filter and digitized at 10 kHz using a Digidata 1440A (Molecular  
913 Devices). Data storage, processing and analysis was done using Clampfit 10.7 (Molecular  
914 Devices). EJP amplitudes were quantified for each of the stimuli over the 400 s stimulation  
915 duration. The EJP amplitudes were then binned per 300 stimuli with the exception of the first  
916 150 stimuli. The consecutive EJP amplitudes for each binned data point were normalized to the  
917 first binned data point of the first 150 stimuli.

918

#### 919 **Western blot**

920 Flies collected separately from three independent crosses were decapitated and heads  
921 homogenized with a motorized pestle in lysis buffer (25 mM HEPES, 100 mM NaCl, 1 mM  
922 CaCl<sub>2</sub>, 1 % Triton, 1X Complete Protease Inhibitor (Sigma)). After incubation on ice for 30  
923 min, samples were spun down at 10000 g for 10 min and supernatant collected and quantified  
924 by Bradford assay (BioRad) in a GloMax Multi Detection Plate Reader (Promega). After  
925 boiling in 1X Laemmli buffer with 8 % 2-mercapto-ethanol (Sigma), samples were ran on a



926 NuPage 4-12 % Bis-Tris gel (Thermo Fisher Scientific) and transferred on a nitrocellulose  
927 membrane (BioRad) subsequently blocked with 10 % BSA in TBS. Primary antibodies were  
928 incubated overnight at 4°C in antibody solution (5 % BSA in 0.05 % TBS-T). Fluorescent  
929 secondary antibodies were incubated for 1 h at room temperature in antibody solution. After  
930 detection with an iBright imaging system (Thermo Fisher Scientific), fluorescent bands were  
931 quantified in ImageJ. EndoA fluorescence was normalized to GAPDH fluorescence.

932 The following antibodies were used: guinea pig anti-EndoA (GP69) [1:5000 (Verstreken et al.,  
933 2002)], rabbit anti-GAPDH [1:2000 (Abcam)], mouse anti-ENDOA1 [1:500 (Santa Cruz)],  
934 mouse anti-Dynamin [1:1000 (BD Biosciences)], rabbit anti-GST [1:2000 (Life  
935 Technologies)]. Alexa Fluor-488/Alexa Fluor-647 conjugated secondary antibodies [1:1000  
936 (Invitrogen)].

937

### 938 **Recombinant protein production and purification**

939 GST-tagged recombinant proteins were produced in competent BL21(DE3) *E.coli* by induction  
940 with 1 mM IPTG (Thermo Fisher Scientific) at 37°C for 4 h followed by additional overnight  
941 incubation at 25°C. Bacteria were collected by centrifugation at 8000 g, resuspended in lysis  
942 buffer (4 mM DTT, 1 mM EDTA, 1X Protease Inhibitor EDTA-free in 1X PBS, pH 6.5-8) and  
943 lysed using a high pressure homogenizer operating at a pressure between 15000-20000 bar  
944 (Emulsiflex C5, Avestin). Homogenized samples were incubated with 1X DNaseI and spun  
945 down at 25000 g for 40 min at 4°C.

946 Purification was performed using affinity chromatography by loading the supernatant on two  
947 5 ml GStap HP column (GE Healthcare) mounted in series and operated at 5 ml/min with an  
948 ÄKTA Pure 25 system (GE Healthcare). After binding, the column was washed with 10 column  
949 volumes of PBS followed by 5 column volumes of PreScission buffer (20 mM Tris, 100 mM  
950 NaCl, 1 mM EDTA, 1 mM DTT, pH 8). Cleavage of the GST tag was performed on column at  
951 room temperature for 4 h with 500 U of PreScission Protease (GE Healthcare) diluted in  
952 PreScission buffer. Cleaved protein was collected in PBS by peak fractionation, while the  
953 remaining uncleaved protein was eluted with 5 column volumes of 100 % elution buffer (20  
954 mM Tris, 10 mM Glutathione reduced, pH 8).

955 Input material and collected fractions were analysed by SDS-PAGE on NuPage 4-12 % Bis-  
956 Tris gel (Thermo Fisher Scientific) and stained with Coomassie.

957 EndoA protein concentrations were estimated by absorbance using the calculated molar  
958 extinction coefficient of 17670 M<sup>-1</sup>cm<sup>-1</sup> for the *Drosophila* proteins, and 17545 M<sup>-1</sup>cm<sup>-1</sup> for the  
959 human proteins.

960

### 961 **Biophysical/structural characterization of recombinant proteins**

962 Prior to biophysical/structural characterization experiments, purified proteins were subjected to  
963 gel filtration to isolate the peak corresponding to dimeric EndoA. A Superdex 200 increase  
964 30/100 column (GE Healthcare) was operated at a flow rate of 0.5 ml/min and buffered with 20

965 mM MOPS, 150 mM NaCl pH 7. The elution volume of the dimer peak was previously  
966 determined by SEC-MALS.

967 Thermal stability was determined through thermal denaturation (from 20°C to 95°C at an  
968 increment rate of 0.3°C/min) monitored by fluorescent emission intensity upon excitation at  
969 266 nm. Measurements were obtained in an Uncle instrument (Unchained Labs). EndoA<sup>WT</sup> was  
970 concentrated to ~3 mg/ml (Amicon Ultra centrifugal filters) and filtered through a 0.22 µm filter  
971 (Millex). Thermal stability was tested in the presence of 1 mM EDTA or 1 mM CaCl<sub>2</sub>.  
972 Measurements were done in triplicate and average thermograms were displayed by plotting the  
973 barycentric mean (BCM) and Static light scattering (SLS) at 266 nm.

974 Fourier Transform InfraRed (FTIR) spectroscopy was performed on a Invenio spectrometer  
975 (Bruker) equipped with a BioATR-II measuring cell (Bruker). Proteins were concentrated to ~2  
976 mg/ml and filtered through a 0.22 µm filter (Millex). Recordings were performed at 25°C. The  
977 temperature was controlled by a thermostatic water bath. Spectra were acquired with a  
978 resolution of 4 cm<sup>-1</sup> and with a total of 120 scans per spectra averaged to improved the signal-  
979 to-noise ratio.

980 Dynamic light scattering (DLS) measurements were performed in a DynaPro DLS plate reader  
981 (Wyatt). Proteins were concentrated to ~2 mg/ml, filtered through a 0.22 µm filter (Millex) and  
982 loaded on a low binding 394-well black plate with transparent bottom (Costar). The  
983 autocorrelation of scattered light intensity was averaged over 5 recordings to obtain single data  
984 points. Wyatt Dynamics software (v7) was used to calculate the hydrodynamic radius.

985 For Small angle X-ray Scattering (SAXS) purified *Drosophila* EndoA and human ENDOA1  
986 proteins were run through a Superdex200 10/300 increase chromatography column (GE  
987 Healthcare) to isolate the peak corresponding to the dimeric protein. The column was buffered  
988 in 20 mM MOPS, 150 mM NaCl, 1 mM DTT, pH 7 or 20 mM MOPS, 150 mM NaCl, 1 mM  
989 DTT, 1 mM CaCl<sub>2</sub>, pH 7. Dimeric proteins were concentrated with an Amicon Ultra centrifugal  
990 filter to a concentration of at least 6 mg/ml. Concentrations were determined by absorbance.  
991 SAXS data were collected according to Supplemental Table 1. The sample of *Drosophila*  
992 EndoA<sup>D265A</sup> mutant was measured at the BM29 beamline of the ESRF synchrotron (Grenoble,  
993 France) (Pernot et al., 2013), while all other samples were measured at the SWING beamline  
994 of the SOLEIL synchrotron (Paris, France) (Thureau et al., 2021). Measurements were  
995 performed using the HPLC-SEC setup available at the beamlines by injecting 30-50 µl of 6-11  
996 mg/ml of protein onto an Advanced BioSEC 300Å 2.7/300 column. The column was pre-  
997 equilibrated with a buffer containing 20 mM MOPS (pH 7), 150 mM NaCl, 1 mM DTT, 5 %  
998 glycerol and either no calcium or 1 mM CaCl<sub>2</sub>. The flow rate was set at 0.3 ml/min for the  
999 measurement performed at the BM29 beamline and at 0.35 ml/min for the ones measured at the  
1000 SWING beamline. The radial averaging was performed using BsxCuBE (Pernot et al., 2013)  
1001 for the data collected at the ESRF synchrotron and using FOXTROT (Perez J., Bizien T., 2022)  
1002 for those collected at the SOLEIL synchrotron. Buffer subtractions were performed using  
1003 CHROMIXS (Panjkovich and Svergun, 2018) and the averaged data, corresponding to the peak  
1004 of interest, were further processed using the ATSAS software package (Petoukhov et al., 2012).  
1005 The molecular weight estimations were taken from the Bayesian assessment method (Hajizadeh

1006 et al., 2018), while the Kratky plots were generated using the ATSAS program PRIMUS  
1007 (Konarev et al., 2003)).

1008

1009

### 1010 **Co-immunoprecipitation**

1011 50  $\mu$ l of slurry Dynabeads Protein G (Thermo Fisher) were coupled with 5  $\mu$ g of mouse  
1012 monoclonal anti-Dynamin antibody (BD Biosciences) rotating for 1 h at room temperature.  
1013 Beads were washed twice with wash buffer (50 mM Tris, 150 mM NaCl, pH 7.5) and incubated  
1014 overnight at 4°C with 1 mg of total *Drosophila* (*w<sup>1118</sup>*) head lysate diluted in wash buffer to a  
1015 final volume of 400  $\mu$ l. After washing the beads twice with wash buffer, they were incubated  
1016 for 4 h at room temperature with 30  $\mu$ g of purified GST-EndoA<sup>WT</sup>, GST-EndoA<sup>D265A</sup> or GST-  
1017 EndoA<sup>D265R</sup>. Following washes, the beads were resuspended in wash buffer and loading dye  
1018 (4X Laemlli buffer (Bio-Rad) + 2-mercapto ethanol (Sigma)), boiled for 10 min at 95°C and  
1019 loaded on NuPage 4-12 % Bis-Tris gel (Thermo Fisher Scientific). After transferring the  
1020 proteins on a nitrocellulose membrane (BioRad), the membrane was processed for Western  
1021 blotting.

1022 Control Co-IP were performed by incubating 50  $\mu$ l of slurry Dynabeads Protein G, not coupled  
1023 with anti-Dynamin antibody, with 1 mg of total head lysate followed by incubation with 30  $\mu$ g  
1024 of purified GST-EndoA<sup>WT</sup>. Incubation times were the same as for the other conditions.

1025 GST-EndoA proteins used for this assay were purified as described in the ‘recombinant proteins  
1026 production and purification’ paragraph, with the exception that the GST tag was not cleaved.  
1027 Proteins were eluted from the 5ml GStrap HP column with elution buffer (20 mM Tris, 10 mM  
1028 Gluthatione reduced, pH 8) and dialyzed overnight at 4°C in 50 mM Tris, 150 mM NaCl, pH  
1029 7.5. GST-EndoA proteins concentrations were estimated by absorbance using the calculated  
1030 molar extinction coefficient of 60780 M<sup>-1</sup>cm<sup>-1</sup>.

1031

### 1032 **Electroretinograms (ERGs)**

1033 ERGs were recorded from 1 to 3-day-old flies as previously described (Soukup et al., 2016).  
1034 Flies were immobilized on glass microscope slides, by use of double-sided tape. For recordings,  
1035 glass electrodes (borosilicate, 1.5 mm outer diameter) filled with 3 M NaCl were placed in the  
1036 thorax as a reference and on the fly eye for recordings. Responses to repetitive light stimuli  
1037 were recorded using Axosope 10.7 and analyzed using Clampfit 10.7 software (Molecular  
1038 Devices) and Igor Pro 6.37.

1039

### 1040 **Light induced neurodegeneration and histology**

1041 Light induced retinal degeneration induced by placing 1 to 3-day-old flies under continuous  
1042 illumination (1300 lux) (Soukup et al., 2013). Batches of flies were also kept in darkness for 7  
1043 days at 25°C. Flies were used for ERG data acquisition, or processed for histological staining  
1044 of the retina.

1045 Histological sections of the retina were prepared by decapitating heads and fixing them in 4 %  
1046 para-formaldehyde and 2.5 % glutaraldehyde in 0.1 M PBS overnight at 4°C or until further  
1047 processing. Heads were then osmicated in 2 % OsO<sub>4</sub> for 2 h and subsequently incubated in 4 %  
1048 uranyl acetate for 1 h. After dehydration using an ethanol series, heads were embedded in hard  
1049 resin (Agar 100, Laborimpex) and semi-thin (1.5 µm) sections were cut on a microtome (EM  
1050 UC7, Leica) and stained on a heating block with a 1 % toluidine blue (Merck) solution including  
1051 2 % Borax for 90 s at 60°C. The stained sections were mounted with Eukit Quick-hardening  
1052 mounting medium (Sigma). Histological sections were analyzed using the Leica DM2500 M  
1053 microscope equipped with a 40X lens.

1054

### 1055 **Gene editing of iPSC**

1056 *SH3GL2* p.G276V was engineered in the “Ctrl65” iPSC line (SFC065, (Baumann et al., 2021)),  
1057 by means of CRISPR/Cas9 gene editing using a split puromycin recombination reporter (Flemr  
1058 and Bühler, 2015). One million cells were seeded per well of a 6-well plate in the presence of  
1059 Rho kinase inhibitor the day before transfection (Miltenyi Biotech; 130-106-538). The next  
1060 day, the cells were transfected using Lipofectamine Stem (Life Technologies; STEM00015)  
1061 with a mix of 1 µg donor single stranded oligodeoxynucleotide, 0.5 µg pRR-Puro plasmid  
1062 (Addgene plasmid #65853) specific for the guide RNA (gRNA) spacer sequence and 1 µg  
1063 px458 encoding for a guide RNA targeting the mutation site (Addgene plasmid #65853; (Ran  
1064 et al., 2013)). Two days post-transfection, cells were treated with 0.5 µg/ml puromycin for 48  
1065 h in the presence of Rho kinase inhibitor. Ten to fourteen days after transfection, resistant  
1066 colonies were manually picked, expanded, and molecularly characterized by means of PCR,  
1067 Sanger sequencing and digital droplet PCR to discard large deletions. Clones showing the  
1068 desired genotype were karyotyped by means of comparative genomic hybridization (CGH) and  
1069 stained for pluripotency markers.

1070

### 1071 **iPSC differentiation**

1072 On day -1, 300.000 hiPSC/cm<sup>2</sup> were seeded on Matrigel coated 6-well plate wells in mTeSR-  
1073 Plus medium supplemented with 10 µM Rho kinase inhibitor (RI). On day 0, medium was  
1074 switched to knockout serum replacement medium (KSR) containing DMEM/F-12, 15 %  
1075 knockout serum replacement, GlutaMAX, Penstrep, non-essential amino acids and 10 µM β-  
1076 mercaptoethanol (all from Life Technologies) supplemented with LDN193189 (500 nM,  
1077 Sigma), SB431542 (10 µM, Tocris), SHH-C24II (100 ng/ml, Miltenyi Biotec), Purmorphamine  
1078 (2 µM, Sigma). CHIR99021 was added to the medium from day 3 to day 13 (CHIR; 3 µM,  
1079 Stemcell Technologies). From day 4, KSR was gradually shifted to Neurobasal/0.5X B27  
1080 supplement without vitamin A, 0.5X N2, GlutaMAX, Penstrep, non-essential amino acids at  
1081 the rate of 1/3 every 2 days for 4 days, and to ¼ for 3 days. SB431542, SHH-C24II, and  
1082 Purmorphamine were withdrawn from the medium at day 7. FGF8b (100 ng/mL, R&D) was  
1083 added to the medium from day 9 until day 16. At day 18, cells were switched to terminal  
1084 differentiation medium consisting of Neurobasal-A/1xB27 supplement without vitamin A,  
1085 GlutaMAX, Penstrep containing BDNF (brain-derived neurotrophic factor, 10 ng/ml; R&D),

1086 ascorbic acid (0.2 mM, Sigma), GDNF (glial cell line-derived neurotrophic factor, 10 ng/ml;  
1087 R&D), dibutyryl cAMP (0.2 mM; Sigma), SR11237 (100 nM, Tocris), and DAPT (10  $\mu$ M;  
1088 Tocris). On day 20, ventral midbrain neural progenitors were cryopreserved and quality  
1089 controlled. Neural progenitor cells were terminally differentiated on coverslips previously  
1090 coated with poly-D-lysine (50  $\mu$ g/mL)/mouse laminin (1  $\mu$ g/mL) in terminal differentiation  
1091 medium for additional 35 days.

1092

### 1093 **Analysis of LC3B puncta in TH<sup>+</sup> neurites**

1094 Terminally differentiated vmDAn (55-60 days) were incubated for 15 min in physiological  
1095 solution (20 mM HEPES pH 7.4, 140 mM NaCl, 4.7 mM KCl, 2.5 mM CaCl<sub>2</sub>, 1.2 mM MgSO<sub>4</sub>,  
1096 1.2 mM KH<sub>2</sub>PO<sub>4</sub>, 11 mM glucose) and subsequently fixed with 4 % para-formaldehyde,  
1097 processed for immunostaining and imaged. Z-stack confocal images were analyzed with ImageJ  
1098 in a semi-automated way. The ‘Skeletonize’ plugin was ran on the TH channel and the total  
1099 length of TH<sup>+</sup> neurites was measured. The skeleton was converted to a mask within which  
1100 LC3B puncta were counted using the ‘Analyze particle’ plugin. The number of LC3B puncta  
1101 within the mask were normalized by the total length of TH<sup>+</sup> neurites and plotted as LC3B  
1102 puncta/TH<sup>+</sup> unit length.

1103

### 1104 **Statistics**

1105 GraphPad Prism 9.3 (San Diego, USA) was used to determine statistical significance. Datasets  
1106 were tested for normal distribution using the D’Agostino-Person Omnibus and Shapiro-Wilk  
1107 normality tests. Normally distributed data were tested with parametric tests: when two datasets  
1108 were compared, the Student’s *t*-test was used, and when more than two datasets were compared,  
1109 a one-way analysis of variance test (ANOVA) followed by a *post hoc* Tukey test was used. For  
1110 non-normally distributed datasets, Mann-Whitney test was used when comparing two datasets,  
1111 and an ANOVA Kruskal-Wallis test followed by a Dunn’s *post hoc* test was used for multiple  
1112 datasets. When multiple parameters were compared (genotypes and treatments) a two-way  
1113 ANOVA was used, followed by a *post hoc* Tukey test or Šidák test for multiple comparison  
1114 correction. Significance levels are defined as \*\*\*\**P* < 0.0001, \*\**P* < 0.01, \**P* < 0.05 and ns, not  
1115 significant. ‘*n*’ in the legends indicates the number of animals used and analyzed. For sptPALM  
1116 images 2 separate NMJs were imaged per animal, while for the confocal imaging and single  
1117 molecule localization studies, 4 different NMJs were imaged in each animal. Data are plotted  
1118 as mean  $\pm$  SEM.

1119

1120 Supplemental Table 1: Experimental conditions of SAXS data collection.

1121

| Organism of production                                  | EndoA_WT                                    | EndoA_D265A                              | EndoA_D265R                                 | ENDO1_WT                                    | ENDO1_WT + 1 mM CaCl <sub>2</sub>           | ENDO1_G276V                                 |
|---------------------------------------------------------|---------------------------------------------|------------------------------------------|---------------------------------------------|---------------------------------------------|---------------------------------------------|---------------------------------------------|
| UniProt sequence ID (residues in construct)             | Q8T390 (1-369)                              | Q8T390 (1-369)                           | Q8T390 (1-369)                              | Q99962 (1-352)                              | Q99962 (1-352)                              | Q99962 (1-352)                              |
| Extinction coefficient [ $\epsilon_{280}, 0.1\%(w/v)$ ] | 17670                                       | 17670                                    | 17670                                       | 17545                                       | 17545                                       | 17545                                       |
| M from chemical composition (Da)                        | 41400                                       | 41400                                    | 41400                                       | 39960                                       | 39960                                       | 39960                                       |
| Beamline used for data collection                       | SWING beamline (SOLEIL synchrotron, France) | BM29 beamline (ESRF synchrotron, France) | SWING beamline (SOLEIL synchrotron, France) | SWING beamline (SOLEIL synchrotron, France) | SWING beamline (SOLEIL synchrotron, France) | SWING beamline (SOLEIL synchrotron, France) |

  

| SEC-SAXS column, Advanced BioSEC 2.7/300     |                                                     |                                                     |                                                     |                                                     |                                                                             |                                                     |
|----------------------------------------------|-----------------------------------------------------|-----------------------------------------------------|-----------------------------------------------------|-----------------------------------------------------|-----------------------------------------------------------------------------|-----------------------------------------------------|
| Loading concentration (mg ml <sup>-1</sup> ) | 11                                                  | 11                                                  | 6                                                   | 8                                                   | 8                                                                           | 10.5                                                |
| Injection volume ( $\mu$ l)                  | 40                                                  | 40                                                  | 50                                                  | 50                                                  | 50                                                                          | 50                                                  |
| Flow rate (ml min <sup>-1</sup> )            | 0.35                                                | 0.35                                                | 0.35                                                | 0.35                                                | 0.35                                                                        | 0.35                                                |
| Solvent                                      | 20 mM MOPS pH 7, 150 mM NaCl, 5% glycerol, 1 mM DTT | 20 mM MOPS pH 7, 150 mM NaCl, 5% glycerol, 1 mM DTT | 20 mM MOPS pH 7, 150 mM NaCl, 5% glycerol, 1 mM DTT | 20 mM MOPS pH 7, 150 mM NaCl, 5% glycerol, 1 mM DTT | 20 mM MOPS pH 7, 150 mM NaCl, 5% glycerol, 1 mM DTT, 1 mM CaCl <sub>2</sub> | 20 mM MOPS pH 7, 150 mM NaCl, 5% glycerol, 1 mM DTT |

1122

1123

1124

## 1125 **Acknowledgements**

1126 We thank VIB-KU Leuven Center for Brain and Disease Research light microscopy unit for  
1127 their help. We thank the members of the Verstreken lab for helpful discussions and comments.  
1128 Dr Tristan Wallis (The University of Queensland, Australia) provided edited DBSCAN code  
1129 for single molecule localization cluster analysis. Dr Sam Duwe (University of Hasselt,  
1130 Belgium) provided technical expertise for the acquisition of single molecule imaging on the  
1131 ELYRA. A Zeiss LSM 780 – SP Mai Tai HP DS (Cell Tissue Imaging Cluster (CIC)) used for  
1132 confocal images for CLEM is supported by Hercules AKUL/11/37 and FWO G.0929.15 to  
1133 Pieter Vanden Berghe, University of Leuven. Research support was provided by ERC  
1134 consolidator grants (to P.V.), the Chan Zuckerberg Initiative (to P.V.), FWO Vlaanderen (to  
1135 P.V, W.V., F.R., J.S., E.M., C.C., N.L.), Initiative d'Excellence de l'Université de Bordeaux  
1136 (IDEX Neurocampus Chair, to S.F.S.), GPR BRAIN\_2030 (to S.F.S.) and the Region Nouvelle-  
1137 Aquitaine (to S.F.S.). The Switch laboratory received funding from the Flanders Institute for  
1138 Biotechnology (VIB) and KU Leuven. This research was also funded in part by Aligning  
1139 Science Across Parkinson's [ASAP-000430] through the Michael J. Fox Foundation for  
1140 Parkinson's Research (MJFF). A.T.B. is supported by the EMBO long-term postdoctoral  
1141 fellowship (ALTF-1034-2018) and Race against dementia – Dementia Australia postdoctoral  
1142 fellowship. P.V. is an alumnus of the FENS-Kavli Network of Excellence.

1143

## 1144 **Author Contributions**

1145 Conceptualization, A.T.B., M.D., S.K., S.F.S. and P.V. Methodology, A.T.B., M.D., S.K., and  
1146 P.V. Investigation: A.T.B., M.D., S.K., C.C., J.S., S.F.G., N.S., N.L., E.M., S.K., K.V., and  
1147 N.G. Formal Analysis: A.T.B., M.D., S.K., J.S., J-B.S., F.A.M., A.E., W.V., F.R., and J.S.  
1148 Writing, A.T.B., M.D., S.K., and P.V. Funding Acquisition, A.T.B., C.C., N.L., E.M., W.V.,  
1149 F.R., J.S. and P.V. Supervision, P.V.. All co-authors read and edited the manuscript. The co-  
1150 first authors are listed in alphabetical order and they explicitly state the equal nature of their  
1151 contribution and thus, the interchangeability of the order they appear on this paper.

1152

## 1153 **Declaration of interest**

1154 The authors declare no competing interest.

1155

## 1156 **References**

- 1157 Alfradique-Dunham, I., Al-Ouran, R., von Coelln, R., Blauwendraat, C., Hill, E., Luo, L.,  
1158 Stillwell, A., Young, E., Kaw, A., Tan, M., et al. (2021). Genome-Wide Association Study  
1159 Meta-Analysis for Parkinson Disease Motor Subtypes. *Neurol. Genet.* *7*, e557.
- 1160 Alvarez-Erviti, L., Rodriguez-Oroz, M.C., Cooper, J.M., Caballero, C., Ferrer, I., Obeso, J.A.,  
1161 and Schapira, A.H.V. (2010). Chaperone-mediated autophagy markers in Parkinson disease  
1162 brains. *Arch. Neurol.* *67*, 1464–1472.
- 1163 Azarnia Tehran, D., Kuijpers, M., and Haucke, V. (2018). Presynaptic endocytic factors in  
1164 autophagy and neurodegeneration. *Curr. Opin. Neurobiol.* *48*, 153–159.
- 1165 Baba, M., Osumi, M., Scott, S. V., Klionsky, D.J., and Ohsumi, Y. (1997). Two distinct  
1166 pathways for targeting proteins from the cytoplasm to the vacuole/lysosome. *J. Cell Biol.* *139*,  
1167 1687–1695.
- 1168 Bademosi, A.T., Lauwers, E., Padmanabhan, P., Odierna, L., Chai, Y.J., Papadopoulos, A.,  
1169 Goodhill, G.J., Verstreken, P., Van Swinderen, B., and Meunier, F.A. (2017). In vivo single-  
1170 molecule imaging of syntaxin1A reveals polyphosphoinositide- and activity-dependent  
1171 trapping in presynaptic nanoclusters. *Nat. Commun.* *8*.
- 1172 Bademosi, A.T., Lauwers, E., Amor, R., Verstreken, P., Van Swinderen, B., and Meunier,  
1173 F.A. (2018). In vivo single-molecule tracking at the drosophila presynaptic motor nerve  
1174 terminal. *J. Vis. Exp.* *2018*.
- 1175 Baumann, H., Ott, F., Weber, J., Trilck-Winkler, M., Münchau, A., Zittel, S., Kostić, V.S.,  
1176 Kaiser, F.J., Klein, C., Busch, H., et al. (2021). Linking Penetrance and Transcription in  
1177 DYT-THAP1: Insights From a Human iPSC-Derived Cortical Model. *Mov. Disord.* *36*.
- 1178 Burke, R.E., and O'Malley, K. (2013). Axon degeneration in Parkinson's disease. *Exp.*  
1179 *Neurol.* *246*, 72–83.
- 1180 Caminiti, S.P., Presotto, L., Baroncini, D., Garibotto, V., Moresco, R.M., Gianolli, L.,  
1181 Volonté, M.A., Antonini, A., and Perani, D. (2017). Axonal damage and loss of connectivity  
1182 in nigrostriatal and mesolimbic dopamine pathways in early Parkinson's disease. *NeuroImage*  
1183 *Clin.* *14*, 734–740.
- 1184 Chang, D., Nalls, M.A., Hallgrímsdóttir, I.B., Hunkapiller, J., Brug, M. van der, Cai, F.,  
1185 Kerchner, G.A., Ayalon, G., Bingol, B., Sheng, M., et al. (2017). A meta-analysis of genome-  
1186 wide association studies identifies 17 new Parkinson's disease risk loci. *Nat. Genet.* *49*, 1511–  
1187 1516.
- 1188 Chen, Y., Deng, L., Maeno-Hikichi, Y., Lai, M., Chang, S., Chen, G., and Zhang, J.F. (2003).  
1189 Formation of an endophilin-Ca<sup>2+</sup> channel complex is critical for clathrin-mediated synaptic  
1190 vesicle endocytosis. *Cell* *115*, 37–48.
- 1191 Chouhan, A.K., Zhang, J., Zinsmaier, K.E., and Macleod, G.T. (2010). Presynaptic  
1192 mitochondria in functionally different motor neurons exhibit similar affinities for Ca<sup>2+</sup> but  
1193 exert little influence as Ca<sup>2+</sup> buffers at nerve firing rates in situ. *J. Neurosci.* *30*, 1869–1881.
- 1194 Chouhan, A.K., Ivannikov, M. V., Lu, Z., Sugimori, M., Llinas, R.R., and Macleod, G.T.  
1195 (2012). Cytosolic Calcium Coordinates Mitochondrial Energy Metabolism with Presynaptic  
1196 Activity. *J. Neurosci.* *32*, 1233–1243.
- 1197 Chouhan, A.K., Guo, C., Hsieh, Y.C., Ye, H., Senturk, M., Zuo, Z., Li, Y., Chatterjee, S.,  
1198 Botas, J., Jackson, G.R., et al. (2016). Uncoupling neuronal death and dysfunction in



- 1199 *Drosophila* models of neurodegenerative disease. *Acta Neuropathol. Commun.* *4*, 62.
- 1200 Constals, A., Penn, A.C., Compans, B., Toulmé, E., Phillipat, A., Marais, S., Retailleau, N.,  
1201 Hafner, A.S., Coussen, F., Hosy, E., et al. (2015). Glutamate-Induced AMPA Receptor  
1202 Desensitization Increases Their Mobility and Modulates Short-Term Plasticity through  
1203 Unbinding from Stargazin. *Neuron* *85*, 787–803.
- 1204 Daida, K., Funayama, M., Li, Y., Yoshino, H., Hayashida, A., Ikeda, A., Ogaki, K., Nishioka,  
1205 K., and Hattori, N. (2020). Identification of Disease-Associated Variants by Targeted Gene  
1206 Panel Resequencing in Parkinson’s Disease. *Front. Neurol.* *11*.
- 1207 Decet, M., and Verstreken, P. (2021). Presynaptic Autophagy and the Connection With  
1208 Neurotransmission. *Front. Cell Dev. Biol.* *9*.
- 1209 Delva, A., Van Weehaeghe, D., Koole, M., Van Laere, K., and Vandenberghe, W. (2020).  
1210 Loss of Presynaptic Terminal Integrity in the Substantia Nigra in Early Parkinson’s Disease.  
1211 *Mov. Disord.* *35*, 1977–1986.
- 1212 Dickman, D.K., Horne, J.A., Meinertzhagen, I.A., and Schwarz, T.L. (2005). A slowed  
1213 classical pathway rather than kiss-and-run mediates endocytosis at synapses lacking  
1214 synaptojanin and endophilin. *Cell* *123*, 521–533.
- 1215 Ester, M., Kriegel, H.-P., Sander, J., and Xu, X. (1996). A Density-Based Algorithm for  
1216 Discovering Clusters in Large Spatial Databases with Noise. In *Proceedings of the 2nd*  
1217 *International Conference on Knowledge Discovery and Data Mining*, pp. 226–231.
- 1218 Flemr, M., and Bühler, M. (2015). Single-step generation of conditional knockout mouse  
1219 embryonic stem cells. *Cell Rep.* *12*.
- 1220 Germer, E.L., Imhoff, S., Vilariño-Güell, C., Kasten, M., Seibler, P., Brüggemann, N., Klein,  
1221 C., and Trinh, J. (2019). The Role of Rare Coding Variants in Parkinson’s Disease GWAS  
1222 Loci. *Front. Neurol.* *10*.
- 1223 Gowrisankaran, S., Houy, S., del Castillo, J.G.P., Steubler, V., Gelker, M., Kroll, J., Pinheiro,  
1224 P.S., Schwitters, D., Halbsgut, N., Pechstein, A., et al. (2020). Endophilin-A coordinates  
1225 priming and fusion of neurosecretory vesicles via intersectin. *Nat. Commun.* *11*.
- 1226 Guichet, A., Wucherpfennig, T., Dudu, V., Etter, S., Wilsch-Bräuniger, M., Hellwig, A.,  
1227 González-Gaitán, M., Huttner, W.B., and Schmidt, A.A. (2002). Essential role of endophilin  
1228 A in synaptic vesicle budding at the *Drosophila* neuromuscular junction. *EMBO J.* *21*, 1661–  
1229 1672.
- 1230 Hajizadeh, N.R., Franke, D., Jeffries, C.M., and Svergun, D.I. (2018). Consensus Bayesian  
1231 assessment of protein molecular mass from solution X-ray scattering data. *Sci. Rep.* *8*.
- 1232 Hegedus, K., Takats, S., Boda, A., Jipa, A., Nagy, P., Varga, K., Kovacs, A.L., and Juhasz, G.  
1233 (2016). The Ccz1-Mon1-Rab7 module and Rab5 control distinct steps of autophagy. *Mol.*  
1234 *Biol. Cell* *27*, 3132–3142.
- 1235 Hill, S.E., Kauffman, K.J., Krout, M., Richmond, J.E., Melia, T.J., and Colón-Ramos, D.A.  
1236 (2019). Maturation and Clearance of Autophagosomes in Neurons Depends on a Specific  
1237 Cysteine Protease Isoform, ATG-4.2. *Dev. Cell* *49*, 251–266.e8.
- 1238 Huff, J. (2015). The Airyscan detector from ZEISS: confocal imaging with improved signal-  
1239 to-noise ratio and super-resolution. *Nat. Methods* *12*, i–ii.
- 1240 Jin, M., and Klionsky, D.J. (2014). Regulation of autophagy: Modulation of the size and

- 1241 number of autophagosomes. *FEBS Lett.* *588*, 2457–2463.
- 1242 Kasprowicz, J., Kuenen, S., Swerts, J., Miskiewicz, K., and Verstreken, P. (2014). Dynamin  
1243 photoinactivation blocks clathrin and  $\alpha$ -adaptin recruitment and induces bulk membrane  
1244 retrieval. *J. Cell Biol.* *204*, 1141–1156.
- 1245 Kechkar, A., Nair, D., Heilemann, M., Choquet, D., and Sibarita, J.B. (2013). Real-Time  
1246 Analysis and Visualization for Single-Molecule Based Super-Resolution Microscopy. *PLoS*  
1247 *One* *8*.
- 1248 Kitada, T., Asakawa, S., Hattori, N., Matsumine, H., Yamamura, Y., Minoshima, S., Yokochi,  
1249 M., Mizuno, Y., and Shimizu, N. (1998). Mutations in the parkin gene cause autosomal  
1250 recessive juvenile parkinsonism. *Nature* *392*, 605–608.
- 1251 Klionsky, D.J., Abdel-Aziz, A.K., Abdelfatah, S., Abdellatif, M., Abdoli, A., Abel, S.,  
1252 Abeliovich, H., Abildgaard, M.H., Abudu, Y.P., Acevedo-Arozena, A., et al. (2021).  
1253 Guidelines for the use and interpretation of assays for monitoring autophagy (4th edition)1.  
1254 *Autophagy* *17*, 1–382.
- 1255 Konarev, P. V., Volkov, V. V., Sokolova, A. V., Koch, M.H.J., and Svergun, D.I. (2003).  
1256 PRIMUS: A Windows PC-based system for small-angle scattering data analysis. *J. Appl.*  
1257 *Crystallogr.* *36*, 1277–1282.
- 1258 Krebs, C.E., Karkheiran, S., Powell, J.C., Cao, M., Makarov, V., Darvish, H., Di Paolo, G.,  
1259 Walker, R.H., Shahidi, G.A., Buxbaum, J.D., et al. (2013). The *sac1* domain of SYNJ1  
1260 identified mutated in a family with early-onset progressive parkinsonism with generalized  
1261 seizures. *Hum. Mutat.* *34*, 1200–1207.
- 1262 Kroemer, G., Mariño, G., and Levine, B. (2010). Autophagy and the Integrated Stress  
1263 Response. *Mol. Cell* *40*, 280–293.
- 1264 Kroll, J., Jaime Tobón, L.M., Vogl, C., Neef, J., Kondratiuk, I., König, M., Strenzke, N.,  
1265 Wichmann, C., Milosevic, I., and Moser, T. (2019). Endophilin-A regulates presynaptic Ca  
1266  $2^{+}$  influx and synaptic vesicle recycling in auditory hair cells. *EMBO J.* *38*.
- 1267 Krüger, R., Kuhn, W., Müller, T., Voitalla, D., Graeber, M., Kösel, S., Przuntek, H., Epplen,  
1268 J.T., Schöls, L., and Riess, O. (1998). Ala30Pro mutation in the gene encoding  $\alpha$ -synuclein in  
1269 Parkinson’s disease. *Nat. Genet.* *18*, 106–108.
- 1270 Kuijpers, M., Kochlamazashvili, G., Stumpf, A., Puchkov, D., Swaminathan, A., Lucht, M.T.,  
1271 Krause, E., Maritzen, T., Schmitz, D., and Haucke, V. (2021). Neuronal Autophagy Regulates  
1272 Presynaptic Neurotransmission by Controlling the Axonal Endoplasmic Reticulum. *Neuron*  
1273 *109*, 299–313.e9.
- 1274 Kulkarni, V.V., Anand, A., Herr, J.B., Miranda, C., Vogel, M.C., and Maday, S. (2021).  
1275 Synaptic activity controls autophagic vacuole motility and function in dendrites. *J. Cell Biol.*  
1276 *220*.
- 1277 Levitan, E.S., Lanni, F., and Shakiryanova, D. (2007). In vivo imaging of vesicle motion and  
1278 release at the *Drosophila* neuromuscular junction. *Nat. Protoc.* *2*, 1117–1125.
- 1279 Manley, S., Gillette, J.M., Patterson, G.H., Shroff, H., Hess, H.F., Betzig, E., and Lippincott-  
1280 Schwartz, J. (2008). High-density mapping of single-molecule trajectories with  
1281 photoactivated localization microscopy. *Nat Methods* *5*, 155–157.
- 1282 Martinet, W., Schrijvers, D.M., Timmermans, J.P., Bult, H., and De Meyer, G.R.Y. (2013).

- 1283 Immunohistochemical analysis of macroautophagy: Recommendations and limitations.  
1284 *Autophagy* 9, 386–402.
- 1285 Matta, S., Van Kolen, K., da Cunha, R., van den Bogaart, G., Mandemakers, W., Miskiewicz,  
1286 K., De Bock, P.J., Morais, V.A., Vilain, S., Haddad, D., et al. (2012). LRRK2 Controls an  
1287 EndoA Phosphorylation Cycle in Synaptic Endocytosis. *Neuron* 75, 1008–1021.
- 1288 Mayford, M., Siegelbaum, S.A., and Kandel, E.R. (2012). Synapses and memory storage.  
1289 *Cold Spring Harb. Perspect. Biol.* 4, 1–18.
- 1290 Milosevic, I., Giovedi, S., Lou, X., Raimondi, A., Collesi, C., Shen, H., Paradise, S., O’Toole,  
1291 E., Ferguson, S., Cremona, O., et al. (2011). Recruitment of endophilin to clathrin-coated pit  
1292 necks is required for efficient vesicle uncoating after fission. *Neuron* 72, 587–601.
- 1293 Montenegro-Venegas, C., Annamnedi, A., Hoffmann-Conaway, S., Gundelfinger, E.D., and  
1294 Garner, C.C. (2020). BSN (bassoon) and PRKN/parkin in concert control presynaptic vesicle  
1295 autophagy. *Autophagy* 16, 1732–1733.
- 1296 Murdoch, J.D., Rostosky, C.M., Gowrisankaran, S., Arora, A.S., Soukup, S.F., Vidal, R.,  
1297 Capece, V., Freytag, S., Fischer, A., Verstreken, P., et al. (2016). Endophilin-A Deficiency  
1298 Induces the Foxo3a-Fbxo32 Network in the Brain and Causes Dysregulation of Autophagy  
1299 and the Ubiquitin-Proteasome System. *Cell Rep.* 17, 1071–1086.
- 1300 Murphy, K.E., Gysbers, A.M., Abbott, S.K., Spiro, A.S., Furuta, A., Cooper, A., Garner, B.,  
1301 Kabuta, T., and Halliday, G.M. (2015). Lysosomal-associated membrane protein 2 isoforms  
1302 are differentially affected in early Parkinson’s disease. *Mov. Disord.* 30, 1639–1647.
- 1303 Nair, D., Hosity, E., Petersen, J.D., Constals, A., Giannone, G., Choquet, D., and Sibarita, J.B.  
1304 (2013). Super-Resolution Imaging Reveals That AMPA Receptors Inside Synapses Are  
1305 Dynamically Organized in Nanodomains Regulated by PSD95. *J. Neurosci.* 33, 13204–13224.
- 1306 Nakatogawa, H. (2020). Mechanisms governing autophagosome biogenesis. *Nat. Rev. Mol.*  
1307 *Cell Biol.* 21, 439–458.
- 1308 Nalls, M.A., Blauwendraat, C., Vallerga, C.L., Heilbron, K., Bandres-Ciga, S., Chang, D.,  
1309 Tan, M., Kia, D.A., Noyce, A.J., Xue, A., et al. (2019). Identification of novel risk loci, causal  
1310 insights, and heritable risk for Parkinson’s disease: a meta-analysis of genome-wide  
1311 association studies. *Lancet Neurol.* 18, 1091–1102.
- 1312 Nishizaki, T., Matsuoka, T., Nomura, T., Sumikawa, K., Shiotani, T., Watabe, S., and Yoshii,  
1313 M. (1998). Nefiracetam modulates acetylcholine receptor currents via two different signal  
1314 transduction pathways. *Mol. Pharmacol.* 53, 1–5.
- 1315 Nixon, R.A. (2013). The role of autophagy in neurodegenerative disease. *Nat. Med.* 19, 983–  
1316 997.
- 1317 Okerlund, N.D., Schneider, K., Leal-Ortiz, S., Montenegro-Venegas, C., Kim, S.A., Garner,  
1318 L.C., Waites, C.L., Gundelfinger, E.D., Reimer, R.J., and Garner, C.C. (2017). Bassoon  
1319 Controls Presynaptic Autophagy through Atg5. *Neuron* 93, 897–913.e7.
- 1320 Olgiati, S., De Rosa, A., Quadri, M., Criscuolo, C., Breedveld, G.J., Picillo, M., Pappatà, S.,  
1321 Quarantelli, M., Barone, P., De Michele, G., et al. (2014). PARK20 caused by SYNJ1  
1322 homozygous Arg258Gln mutation in a new Italian family. *Neurogenetics* 15, 183–188.
- 1323 Olgiati, S., Quadri, M., Fang, M., Rood, J.P.M.A., Saute, J.A., Chien, H.F., Bouwkamp, C.G.,  
1324 Graafland, J., Minneboo, M., Breedveld, G.J., et al. (2016). DNAJC6 Mutations Associated

- 1325 with Early-Onset Parkinson's Disease. *Ann. Neurol.* *79*, 244–256.
- 1326 Oliveira, L.M.A., Falomir-Lockhart, L.J., Botelho, M.G., Lin, K.H., Wales, P., Koch, J.C.,  
1327 Gerhardt, E., Taschenberger, H., Outeiro, T.F., Lingor, P., et al. (2015). Elevated  $\alpha$ -synuclein  
1328 caused by SNCA gene triplication impairs neuronal differentiation and maturation in  
1329 Parkinson's patient-derived induced pluripotent stem cells. *Cell Death Dis.* *6*.
- 1330 Paisán-Ruiz, C. (2009). LRRK2 gene variation and its contribution to Parkinson disease.  
1331 *Hum. Mutat.* *30*, 1153–1160.
- 1332 Panjkovich, A., and Svergun, D.I. (2018). CHROMIXS: Automatic and interactive analysis of  
1333 chromatography-coupled small-angle X-ray scattering data. *Bioinformatics* *34*, 1944–1946.
- 1334 Perez J., Bizien T., T.A. and G.A.F. (2022). <https://www.synchrotron-soleil.fr/en/beamlines/swing>.
- 1336 Pernot, P., Round, A., Barrett, R., De Maria Antolinos, A., Gobbo, A., Gordon, E., Huet, J.,  
1337 Kieffer, J., Lentini, M., Mattenet, M., et al. (2013). Upgraded ESRF BM29 beamline for  
1338 SAXS on macromolecules in solution. *J. Synchrotron Radiat.* *20*, 660–664.
- 1339 Petoukhov, M. V., Franke, D., Shkumatov, A. V., Tria, G., Kikhney, A.G., Gajda, M., Gorba,  
1340 C., Mertens, H.D.T., Konarev, P. V., and Svergun, D.I. (2012). New developments in the  
1341 ATSAS program package for small-angle scattering data analysis. *J. Appl. Crystallogr.* *45*,  
1342 342–350.
- 1343 Polymeropoulos, M.H., Lavedan, C., Leroy, E., Ide, S.E., Dehejia, A., Dutra, A., Pike, B.,  
1344 Root, H., Rubenstein, J., Boyer, R., et al. (1997). Mutation in the  $\alpha$ -synuclein gene identified  
1345 in families with Parkinson's disease. *Science* (80-. ). *276*, 2045–2047.
- 1346 Proukakis, C., Dudzik, C.G., Brier, T., MacKay, D.S., Cooper, J.M., Millhauser, G.L.,  
1347 Houlden, H., and Schapira, A.H. (2013). A novel  $\alpha$ -synuclein missense mutation in Parkinson  
1348 disease. *Neurology* *80*, 1062–1064.
- 1349 Quadri, M., Fang, M., Picillo, M., Olgiati, S., Breedveld, G.J., Graafland, J., Wu, B., Xu, F.,  
1350 Erro, R., Amboni, M., et al. (2013). Mutation in the SYNJ1 gene associated with autosomal  
1351 recessive, early-onset parkinsonism. *Hum. Mutat.* *34*, 1208–1215.
- 1352 Ramaswami, M., Krishnan, K.S., and Kelly, R.B. (1994). Intermediates in synaptic vesicle  
1353 recycling revealed by optical imaging of *Drosophila* neuromuscular junctions. *Neuron* *13*,  
1354 363–375.
- 1355 Ran, F.A., Hsu, P.D., Wright, J., Agarwala, V., Scott, D.A., and Zhang, F. (2013). Genome  
1356 engineering using the CRISPR-Cas9 system. *Nat. Protoc.* *8*.
- 1357 Ringstad, N., Gad, H., Löw, P., Di Paolo, G., Brodin, L., Shupliakov, O., and De Camilli, P.  
1358 (1999). Endophilin/sh3p4 is required for the transition from early to late stages in clathrin-  
1359 mediated synaptic vesicle endocytosis. *Neuron* *24*, 143–154.
- 1360 Satake, W., Nakabayashi, Y., Mizuta, I., Hirota, Y., Ito, C., Kubo, M., Kawaguchi, T.,  
1361 Tsunoda, T., Watanabe, M., Takeda, A., et al. (2009). Genome-wide association study  
1362 identifies common variants at four loci as genetic risk factors for Parkinson's disease. *Nat.*  
1363 *Genet.* *41*, 1303–1307.
- 1364 Schöndorf, D.C., Aureli, M., McAllister, F.E., Hindley, C.J., Mayer, F., Schmid, B., Sardi,  
1365 S.P., Valsecchi, M., Hoffmann, S., Schwarz, L.K., et al. (2014). iPSC-derived neurons from  
1366 GBA1-associated Parkinson's disease patients show autophagic defects and impaired calcium

- 1367 homeostasis. *Nat. Commun.* 5.
- 1368 Schuske, K.R., Richmond, J.E., Matthies, D.S., Davis, W.S., Runz, S., Rube, D.A., Van Der  
1369 Blied, A.M., and Jorgensen, E.M. (2003). Endophilin is required for synaptic vesicle  
1370 endocytosis by localizing synaptojanin. *Neuron* 40, 749–762.
- 1371 Shehata, M., Matsumura, H., Okubo-Suzuki, R., Ohkawa, N., and Inokuchi, K. (2012).  
1372 Neuronal stimulation induces autophagy in hippocampal neurons that is involved in AMPA  
1373 receptor degradation after chemical long-term depression. *J. Neurosci.* 32, 10413–10422.
- 1374 Simón-Sánchez, J., Schulte, C., Bras, J.M., Sharma, M., Gibbs, J.R., Berg, D., Paisan-Ruiz,  
1375 C., Lichtner, P., Scholz, S.W., Hernandez, D.G., et al. (2009). Genome-wide association study  
1376 reveals genetic risk underlying Parkinson’s disease. *Nat. Genet.* 41, 1308–1312.
- 1377 Slabbaert, J.R., Kuenen, S., Swerts, J., Maes, I., Uytterhoeven, V., Kasprowicz, J., Fernandes,  
1378 A.C., Blust, R., and Verstreken, P. (2016). Shawn, the *Drosophila* homolog of SLC25A39/40,  
1379 is a mitochondrial carrier that promotes neuronal survival. *J. Neurosci.* 36, 1914–1929.
- 1380 Soukup, S.F., and Verstreken, P. (2017). EndoA/Endophilin-A creates docking stations for  
1381 autophagic proteins at synapses. *Autophagy* 13, 971–972.
- 1382 Soukup, S., Vanhauwaert, R., and Verstreken, P. (2018). Parkinson’s disease: convergence on  
1383 synaptic homeostasis. *EMBO J.* 37.
- 1384 Soukup, S.F., Pocha, S.M., Yuan, M., and Knust, E. (2013). DLin-7 is required in  
1385 postsynaptic lamina neurons to prevent light-induced photoreceptor degeneration in  
1386 *drosophila*. *Curr. Biol.* 23, 1349–1354.
- 1387 Soukup, S.F., Kuenen, S., Vanhauwaert, R., Manetsberger, J., Hernández-Díaz, S., Swerts, J.,  
1388 Schoovaerts, N., Vilain, S., Gounko, N. V., Vints, K., et al. (2016). A LRRK2-Dependent  
1389 EndophilinA Phosphoswitch Is Critical for Macroautophagy at Presynaptic Terminals.  
1390 *Neuron* 92, 829–844.
- 1391 Sudhof, T.C. (2004). The synaptic vesicle cycle. *Annu Rev Neurosci* 27, 509–547.
- 1392 Südhof, T.C. (2013). Neurotransmitter release: The last millisecond in the life of a synaptic  
1393 vesicle. *Neuron* 80, 675–690.
- 1394 Südhof, T.C., and Malenka, R.C. (2008). Understanding Synapses: Past, Present, and Future.  
1395 *Neuron* 60, 469–476.
- 1396 Tanji, K., Mori, F., Kakita, A., Takahashi, H., and Wakabayashi, K. (2011). Alteration of  
1397 autophagosomal proteins (LC3, GABARAP and GATE-16) in Lewy body disease. *Neurobiol.*  
1398 *Dis.* 43, 690–697.
- 1399 Thureau, A., Roblin, P., and Pérez, J. (2021). BioSAXS on the SWING beamline at  
1400 Synchrotron SOLEIL. *J. Appl. Crystallogr.* 54, 1698–1710.
- 1401 Tokunaga, M., Imamoto, N., and Sakata-Sogawa, K. (2008). Highly inclined thin illumination  
1402 enables clear single-molecule imaging in cells. *Nat. Methods* 5.
- 1403 Vanhauwaert, R., Kuenen, S., Masius, R., Bademosi, A., Manetsberger, J., Schoovaerts, N.,  
1404 Bounti, L., Gontcharenko, S., Swerts, J., Vilain, S., et al. (2017). The SAC 1 domain in  
1405 synaptojanin is required for autophagosome maturation at presynaptic terminals . *EMBO J.*  
1406 36, 1392–1411.
- 1407 Verstreken, P., Kjaerulff, O., Lloyd, T.E., Atkinson, R., Zhou, Y., Meinertzhagen, I.A., and

- 1408 Bellen, H.J. (2002). Endophilin mutations block clathrin-mediated endocytosis but not  
1409 neurotransmitter release. *Cell* *109*, 101–112.
- 1410 Verstreken, P., Koh, T.W., Schulze, K.L., Zhai, R.G., Hiesinger, P.R., Zhou, Y., Mehta, S.Q.,  
1411 Cao, Y., Roos, J., and Bellen, H.J. (2003). Synaptojanin is recruited by endophilin to promote  
1412 synaptic vesicle uncoating. *Neuron* *40*, 733–748.
- 1413 Verstreken, P., Ly, C. V., Venken, K.J.T., Koh, T.W., Zhou, Y., and Bellen, H.J. (2005).  
1414 Synaptic mitochondria are critical for mobilization of reserve pool vesicles at *Drosophila*  
1415 neuromuscular junctions. *Neuron* *47*, 365–378.
- 1416 Verstreken, P., Ohyama, T., and Bellen, H.J. (2008). FM 1-43 labeling of synaptic vesicle  
1417 pools at the *drosophila* neuromuscular junction. *Methods Mol. Biol.* *440*, 349–369.
- 1418 Vijayan, V., and Verstreken, P. (2017). Autophagy in the presynaptic compartment in health  
1419 and disease. *J. Cell Biol.* *216*, 1895–1906.
- 1420 Wang, T., and Montell, C. (2007). Phototransduction and retinal degeneration in *Drosophila*.  
1421 *Pflugers Arch. Eur. J. Physiol.* *454*, 821–847.
- 1422 Wang, T., Martin, S., Papadopulos, A., Harper, C.B., Mavlyutov, T.A., Niranjana, D., Glass,  
1423 N.R., Cooper-White, J.J., Sibarita, J.B., Choquet, D., et al. (2015). Control of autophagosome  
1424 axonal retrograde flux by presynaptic activity unveiled using botulinum neurotoxin type A. *J.*  
1425 *Neurosci.* *35*, 6179–6194.
- 1426 Wang, T., Li, W., Martin, S., Papadopulos, A., Joensuu, M., Liu, C., Jiang, A., Shamsollahi,  
1427 G., Amor, R., Lanoue, V., et al. (2020). Radial contractility of actomyosin rings facilitates  
1428 axonal trafficking and structural stability. *J. Cell Biol.* *219*.
- 1429 Wang, Y.C., Lauwers, E., and Verstreken, P. (2017). Presynaptic protein homeostasis and  
1430 neuronal function. *Curr. Opin. Genet. Dev.* *44*, 38–46.
- 1431 Watanabe, S., Mamer, L.E., Raychaudhuri, S., Luvsanjav, D., Eisen, J., Trimbuch, T., Söhl-  
1432 Kielczynski, B., Fenske, P., Milosevic, I., Rosenmund, C., et al. (2018). Synaptojanin and  
1433 Endophilin Mediate Neck Formation during Ultrafast Endocytosis. *Neuron* *98*, 1184–1197.e6.
- 1434 Wilhelm, B.G., Mandad, S., Truckenbrodt, S., Krohnert, K., Schafer, C., Rammner, B., Koo,  
1435 S.J., Classen, G.A., Krauss, M., Haucke, V., et al. (2014). Composition of isolated synaptic  
1436 boutons reveals the amounts of vesicle trafficking proteins. *Science* (80-. ). *344*, 1023–1028.
- 1437 Yang, S., Park, D., Manning, L., Hill, S.E., Cao, M., Xuan, Z., Gonzalez, I., Dong, Y., Clark,  
1438 B., Shao, L., et al. (2022). Presynaptic autophagy is coupled to the synaptic vesicle cycle via  
1439 ATG-9. *Neuron* *110*, 824–840.e10.
- 1440 Yang, Y., Chen, J., Chen, X., Li, D., He, J., Wang, S., Zhao, S., Yang, X., Deng, S., Tong, C.,  
1441 et al. (2021). Endophilin a1 drives acute structural plasticity of dendritic spines in response to  
1442 Ca<sup>2+</sup>/calmodulin. *J. Cell Biol.* *220*.
- 1443 Yoshii, M., and Watabe, S. (1994). Enhancement of neuronal calcium channel currents by the  
1444 nootropic agent, nefiracetam (DM-9384), in NG108-15 cells. *Brain Res.* *642*, 123–131.
- 1445 Yoshii, M., Watabe, S., Murashima, Y.L., Nukada, T., and Shiotani, T. (2000). Cellular  
1446 mechanism of action of cognitive enhancers: Effects of nefiracetam on neuronal Ca<sup>2+</sup>  
1447 channels. In *Alzheimer Disease and Associated Disorders*, p.
- 1448 Yue, M., Hinkle, K.M., Davies, P., Trushina, E., Fiesel, F.C., Christenson, T.A., Schroeder,  
1449 A.S., Zhang, L., Bowles, E., Behrouz, B., et al. (2015). Progressive dopaminergic alterations

- 1450 and mitochondrial abnormalities in LRRK2 G2019S knock-in mice. *Neurobiol. Dis.* *78*, 172–  
1451 195.
- 1452 Zarranz, J.J., Alegre, J., Gómez-Esteban, J.C., Lezcano, E., Ros, R., Ampuero, I., Vidal, L.,  
1453 Hoenicka, J., Rodriguez, O., Atarés, B., et al. (2004). The New Mutation, E46K, of  $\alpha$ -  
1454 Synuclein Causes Parkinson and Lewy Body Dementia. *Ann. Neurol.* *55*, 164–173.
- 1455 Zhang, J., Fan, J., Tian, Q., Song, Z., Zhang, J.F., and Chen, Y. (2012a). Characterization of  
1456 two distinct modes of endophilin in clathrin-mediated endocytosis. *Cell. Signal.* *24*, 2043–  
1457 2050.
- 1458 Zhang, M., Chang, H., Zhang, Y., Yu, J., Wu, L., Ji, W., Chen, J., Liu, B., Lu, J., Liu, Y., et  
1459 al. (2012b). Rational design of true monomeric and bright photoactivatable fluorescent  
1460 proteins. *Nat. Methods* *9*, 727–729.
- 1461

## 1462 **Figure Legends**

### 1463 **Figure 1 Ca<sup>2+</sup> influx-induced synaptic autophagy is EndoA dependent**

1464 (A-E) Live imaging of non-stimulated and stimulated (following 30 min of 20 Hz electrical  
1465 nerve stimulation) of *Drosophila* larvae NMJ boutons expressing Atg8<sup>mCherry</sup> at endogenous  
1466 levels in the absence of Ca<sup>2+</sup> (A, A'), presence of Ca<sup>2+</sup> (B, B'), presence of EGTA-AM (No  
1467 Ca<sup>2+</sup> in the buffer) (C) and presence of DMSO plus Ca<sup>2+</sup> (D). Fluorescence intensities shown  
1468 using scale (0-1292 gray value) indicated in (B). (E) Quantification of the number of Atg8<sup>mCherry</sup>  
1469 dots (arrowheads). Error bars represent mean ± SEM; scale bar: 5 μm. Statistical significance  
1470 was calculated with an ordinary one-way ANOVA with Tukey's multiple comparison test: \*\*  
1471  $P < 0.01$ , ns, not significant,  $n \geq 6$  larvae (24 NMJs) per genotype.

1472 (F-H) Live imaging of genomically expressed Atg8<sup>mCherry</sup> in NMJ boutons of *w* control animals  
1473 (F, F') and of animals expressing RNAi against *atg3* (under the control of the pan-neuronal  
1474 driver *nSyb-Gal4*) (G, G'). (F, G) Non-stimulated animals were incubated for 30 min in HL3  
1475 solution containing calcium channel agonist – Nefiracetam (Nefi) (10 μM) and post-synaptic  
1476 glutamate receptor blocker 1-Naphthylacetyl spermine trihydrochloride (NAS) (100 μM). (F',  
1477 G') Stimulated animals were incubated for 30 min in HL3 solution containing Nefi (10 μM),  
1478 NAS (100 μM) and CaCl<sub>2</sub> (1 mM). (H) Quantification of the number of Atg8<sup>mCherry</sup> dots  
1479 (arrowheads). Error bars represent mean ± SEM; scale bar: 5 μm. Statistical significance was  
1480 calculated with an ordinary two-way ANOVA with Šidák multiple comparison test: \*\*  $P <$   
1481 0.01, ns, not significant,  $n \geq 9$  larvae (36 NMJs) per genotype.

1482 (I-K) Live imaging of genomically expressed Atg8<sup>mCherry</sup> in NMJ boutons of *w* control animals  
1483 (I, I') and of *endoA*<sup>-/-</sup> null mutant animals expressing phosphodead *endoA*<sup>S75A</sup> at endogenous  
1484 levels (J, J'). (K) Quantification of the number of Atg8<sup>mCherry</sup> dots (arrowheads). Error bars  
1485 represent mean ± SEM; scale bar: 5 μm. Statistical significance was calculated with an ordinary  
1486 two-way ANOVA with Šidák multiple comparison test: \*\*  $P < 0.01$ , ns, not significant,  $n \geq 11$   
1487 larvae (44 NMJs) per genotype. Full genotypes are included in the methods.

1488

### 1489 **Figure 2 EndoA mutants increase lethality in an endocytic-independent manner**

1490 (A) Proteins alignment showing conservation of the negatively charged glutamic acid in  
1491 position 264 of *Rat* ENDOA2 and negatively charged aspartic acid in position 265 of  
1492 *Drosophila* EndoA flexible region.

1493 (B-B') Co-immunoprecipitation of Dynamin and GST-EndoA wild type and mutants. (B)  
1494 Western blot of 1 % control fly heads (*w*<sup>1118cs</sup>, input A) and 1 % purified GST-EndoA (input B)  
1495 and whole co-IP fraction. Blot probed with anti-Dynamin (expected size 97 KDa) and anti-GST  
1496 (expected size 67 KDa) to assess co-IP efficiency. (B') Quantification of GST/Dynamin signal  
1497 in IP lane. Error bars represent mean ± SEM. Statistical significance calculated with an ordinary  
1498 one-way ANOVA with Tukey's multiple comparison test: \*  $P < 0.05$ , \*\*\*  $P < 0.001$  ns, not  
1499 significant. Experiment repeated in 4 independent replicates.

1500 (C) Representative images of boutons loaded (1 min, 90 mM KCl, 1.5 mM CaCl<sub>2</sub>) with FM 1-  
1501 43 (4 μM) and quantification (C') of the following genotypes: control (*nSyb-Gal4/+*), *endoA*<sup>-/-</sup>  
1502 animals that express *endoA*<sup>WT</sup>, *endoA*<sup>D265A</sup> or *endoA*<sup>D265R</sup> under the control of *nSyb-Gal4*. Scale  
1503 bar: 5 μm. Statistical significance was calculated with an ordinary one-way ANOVA with  
1504 Tukey's multiple comparison test: ns, not significant,  $n \geq 6$  larvae (24 NMJs) per genotype.



1505 (D) Relative EJP amplitudes and raw traces recorded during 400 s of 10 Hz stimulation train of  
1506 the indicated genotypes.

1507 (E) Quantification of EJP amplitudes of indicated genotypes. Statistical significance was  
1508 calculated with an ordinary one-way ANOVA with Tukey's multiple comparison test: ns, not  
1509 significant,  $n \geq 7$  larvae per genotype.

1510 (F) Representative electron micrographs of NMJ bouton and (F') quantification of the number  
1511 of synaptic vesicles (SV) per bouton area ( $/ \mu\text{m}^2$ ) for animals of the indicated genotypes. Scale  
1512 bar: 150 nm. Data point represent single boutons from  $\geq 3$  animals per genotype. Statistical  
1513 significance calculated with an ordinary one-way ANOVA with Tukey's multiple comparison  
1514 test: ns, not significant.

1515 (G) Survival rate (in percentage) of adult *endoA*<sup>-/-</sup> *Drosophila* expressing *endoA*<sup>WT</sup>, *endoA*<sup>D265A</sup>,  
1516 or *endoA*<sup>D265R</sup> under the control of the pan-neuronal driver *nSyb-Gal4* over 120 days. Median  
1517 survival of *endoA*<sup>WT</sup> expressing flies is 31.5 days, 12 days for *endoA*<sup>D265A</sup> expressing flies and  
1518 3 days for *endoA*<sup>D265R</sup> expressing flies. Statistical significance was calculated using Log-rank  
1519 Mantel-Cox test: \*\*\*\*  $P < 0.0001$ ,  $n \geq 28$  animals per genotype.

1520

### 1521 **Figure 3 EndoA mutants alter Ca<sup>2+</sup> influx mediated synaptic autophagy induction**

1522 (A-E) Live imaging of genomically expressed Atg8<sup>mCherry</sup> in NMJ boutons of control (*nSyb-*  
1523 *Gal4/+*) animals (A, A') and of *endoA*<sup>-/-</sup> animals expressing *endoA*<sup>WT</sup> (B, B'), *endoA*<sup>D265A</sup> (C,  
1524 C'), and *endoA*<sup>D265R</sup> (D, D') (under the control of the pan-neuronal driver *nSyb-Gal4*). Non-  
1525 stimulated animals were incubated for 30 min in HL3, Nefi (10  $\mu\text{M}$ ) and NAS (100  $\mu\text{M}$ )  
1526 solution (A, B, C, D). Stimulated animals were incubated for 30 min in HL3 solution containing  
1527 Nefi (10  $\mu\text{M}$ ), NAS (100  $\mu\text{M}$ ) and CaCl<sub>2</sub> (1 mM) (A', B', C', D'). Fluorescence intensities  
1528 shown using scale (0-23645 gray value) indicated in (D). Arrowheads indicate Atg8<sup>mCherry</sup>  
1529 accumulations. Scale bar: 5  $\mu\text{m}$ . (E) Quantification of the number of Atg8<sup>mCherry</sup> dots  
1530 (arrowheads) per NMJ area. Error bars represent mean  $\pm$  SEM. Statistical significance was  
1531 calculated with an ordinary two-way ANOVA with Tukey's multiple comparison test: \*  $P <$   
1532 0.05, \*\*\*  $P < 0.001$ , ns, not significant,  $n \geq 12$  larvae (48 NMJs) per genotype. Significance  
1533 levels displayed above 'Nefi' columns refer to comparison with 'Nefi' treatment (unstimulated)  
1534 on control animals.

1535 (F-K) CLEM of boutons of *endoA*<sup>-/-</sup> animals expressing *endoA*<sup>D265R</sup> under the pan-neuronal  
1536 driver *nSyb-Gal4*, as well as Atg8<sup>mCherry</sup> expressed at endogenous levels. (F) Single confocal  
1537 slice of an example NMJ displaying an Atg8<sup>mCherry</sup> structure (arrowhead). Scale bar: 5  $\mu\text{m}$ . (F')  
1538 Zoom out of the same NMJ shown in (F). Asterisks indicate branding marks, arrowhead  
1539 indicates Atg8<sup>mCherry</sup> structure. Scale bar: 20  $\mu\text{m}$ . (F'') Electron micrograph of the same region  
1540 as in (F'). Asterisks indicate branding marks, arrowhead indicates Atg8<sup>mCherry</sup> structure. Scale  
1541 bar: 10 $\mu\text{m}$ . (F''') Overlay of confocal image in (F') with electron micrograph in (F''). Asterisks  
1542 indicate branding marks, arrowhead indicates Atg8<sup>mCherry</sup> structure. Scale bar: 10  $\mu\text{m}$ . (G-G')  
1543 Zoomed representation of the bouton containing the Atg8<sup>mCherry</sup> structure shown as overlay (G)  
1544 and electron micrograph only (G'). Red arrowhead indicates the structure correlating with the  
1545 mCherry signal. Scale bar: 1  $\mu\text{m}$ . (G'') Magnification of the putative autophagosome. Scale  
1546 bar: 200 nm. (H-H''') Single TEM slices showing the putative autophagosomal structure

1547 visible in multiple consecutive slices (red arrowhead). Z=1: 0, Z=7: 42 nm, Z=9: 560 nm, Z=11:  
1548 700 nm, Z=15: 980 nm. Scale bar: 1  $\mu$ m.  
1549 (I-K) Examples of autophagosomal structures (red arrowheads) from the same animal. Scale  
1550 bar: 1  $\mu$ m.  
1551

#### 1552 **Figure 4 Synaptic nanoscale organization of EndoA is Ca<sup>2+</sup> influx dependent**

1553 (A-G) Representative images of Airyscan confocal single slice sections of synaptic boutons of  
1554 paraformaldehyde-fixed control (*nSyb-Gal4/+*) (A, A') and *endoA*<sup>-/-</sup> larvae expressing  
1555 *endoA*<sup>D265A</sup> (B, B'), *endoA*<sup>WT</sup> (C, C'), and *endoA*<sup>D265R</sup> (D, D') (under the control of the pan-  
1556 neuronal driver *nSyb-Gal4*) labelled with anti-EndoA antibody. Scale bar: 5 $\mu$ m. Non-stimulated  
1557 animals were incubated for 30 min in HL3, Nefi (10  $\mu$ M) and NAS (100  $\mu$ M) solution (A, B,  
1558 C, D). Stimulated animals were incubated for 30 min in HL3 solution containing Nefi (10  $\mu$ M),  
1559 NAS (100  $\mu$ M) and CaCl<sub>2</sub> (1 mM) (A', B', C', D'). (E, F) Zoomed in synaptic boutons (from  
1560 B and D respectively) showing quantification of EndoA intensity around the synaptic plasma  
1561 membrane (magenta) and within the synaptic lumen - cytosol (green). See Methods for details.  
1562 (G) Quantification of the EndoA integrated intensity across genotypes indicated in (A-D)  
1563 showing ratio of EndoA intensity at the membrane to that within the cytosol. Error bars  
1564 represent mean  $\pm$  SEM; statistical significance was calculated with an ordinary two-way  
1565 ANOVA with Tukey's multiple comparison test: \*  $P < 0.05$ , \*\*  $P < 0.01$ , ns, not significant, n  
1566  $\geq 4$  larvae (16 NMJs) per genotype. Significance levels displayed above 'Nefi' columns refer  
1567 to comparison with 'Nefi' treatment (unstimulated) on control animals.

1568 (H-H') Representative images of Airyscan confocal single slice sections of individual synaptic  
1569 boutons of paraformaldehyde-fixed control (*nSyb-Gal4/+*) in stimulated and non stimulated  
1570 conditions, labelled with anti-EndoA antibody and expressing Atg8<sup>mCherry</sup> at endogenous levels.  
1571 Scale bar: 5  $\mu$ m. Only synaptic boutons with Atg8<sup>mCherry</sup> punctae (enclosed in dotted circles)  
1572 indicative of autophagosomes were selected and EndoA integrated density in a radius of 100  
1573 nm from the Atg8<sup>mCherry</sup> punctae was measured. (H') Quantification of the normalized  
1574 integrated EndoA intensity across genotypes indicated in (A-D) showing EndoA intensity 100  
1575 nm around Atg8<sup>mCherry</sup> punctae. Data from all genotypes was normalized to control (*nSyb-*  
1576 *Gal4/+*) unstimulated data. Error bars represent mean  $\pm$  SEM; statistical significance was  
1577 calculated with an ordinary two-way ANOVA with Tukey's multiple comparison test: \*  $P <$   
1578 0.05, \*\*  $P < 0.01$ , ns, not significant, nd, no data, n  $\geq 4$  larvae (16 NMJs) per genotype.

1579 (I-K) Transgenic *endoA*<sup>-/-</sup> larvae expressing *endoA*<sup>WT::mEos3.1</sup>, *endoA*<sup>D265A::mEos3.1</sup> or  
1580 *endoA*<sup>D265R::mEos3.1</sup> (under the control of the pan-neuronal driver *nSyb-Gal4*) were imaged using  
1581 single molecule localization photoactivated localization microscopy (PALM) at 20 Hz.  
1582 Representative images show cluster map colour-coded for cluster size and density distribution  
1583 of *endoA*<sup>::mEos3.1</sup> generated by density-based spatial clustering of applications with noise  
1584 (DBSCAN) analysis. Arrowheads indicate EndoA nanodomains. Fluorescence intensity shown  
1585 using indicated scale (2-203). Scale bar: 2  $\mu$ m. (I'-K') Quantification of the mean cluster area  
1586 of *endoA*<sup>WT::mEos3.1</sup>, *endoA*<sup>D265A::mEos3.1</sup> and *endoA*<sup>D265R::mEos3.1</sup> in non-stimulated and stimulated  
1587 conditions. Error bars represent mean  $\pm$  SEM; statistical significance was calculated with an  
1588 student *t*-test two-tailed unpaired distribution: \*\*  $P < 0.01$ , ns, not significant, n  $\geq 5$  larvae (20  
1589 NMJs) per genotype.

1590 (L-N) Transgenic *endoA*<sup>-/-</sup> larvae expressing *endoA*<sup>WT::mEos3.1</sup>, *endoA*<sup>D265A::mEos3.1</sup> or  
1591 *endoA*<sup>D265R::mEos3.1</sup> (under the control of the pan-neuronal driver *nSyb-Gal4*) were imaged using  
1592 single particle tracking photoactivated localization microscopy (sptPALM) at 20 Hz.  
1593 Representative trajectories located within EndoA nanodomains in NMJ boutons of *endoA*<sup>-/-</sup>  
1594 larvae expressing *endoA*<sup>WT::mEos3.1</sup> (L), *endoA*<sup>D265A::mEos3.1</sup> (M) and *endoA*<sup>D265R::mEos3.1</sup> (N). This  
1595 is quantified for each genotype as mean square displacement (MSD) as a function of time (O).  
1596 (P) Quantification of the area under the MSD curve ( $\mu\text{m}^2\text{s}$ ) represented in (O). Error bars  
1597 represent mean  $\pm$  SEM; statistical significance was calculated with an ordinary one-way  
1598 ANOVA with Tukey's multiple comparison test: \*\*  $P < 0.01$ ,  $n \geq 4$  larvae ( $n \geq 14$  nanodomains)  
1599 per genotype.  
1600

### 1601 **Figure 5 EndoA insensitivity to Ca<sup>2+</sup> influx induces neurodegeneration**

1602 (A-G'') Representative ERG traces recorded from control (*cn bw; longGMR Gal4/+*) and  
1603 *endoA*<sup>-/-</sup> mutant flies expressing *endoA*<sup>WT</sup>, *endoA*<sup>D265A</sup> or *endoA*<sup>D265R</sup> under a photoreceptor  
1604 specific driver (*longGMR-Gal4*). *Cn bw* mutations remove the protective eye pigmentation.  
1605 Prior to ERG recording, animals were exposed to 1-3 (A, C, E, G) or 7 days of constant dark  
1606 (A', C', E', G') or 7 days of constant light (A'', C'', E'', G''). Average traces are depicted in  
1607 black. Arrowhead indicates ERG depolarization.

1608 (I) Quantification of ERG depolarization amplitude recorded upon a 1 s light pulse in flies  
1609 exposed to dark or light. Plotted bars show mean  $\pm$  SEM. Statistical significance calculated with  
1610 an ordinary one-way ANOVA with Tukey's multiple comparison test: \*  $P < 0.05$ , \*\*  $P < 0.01$ ,  
1611 \*\*\*\*  $P < 0.0001$ . Plotted significance level refers to the difference to the control (*cn bw;*  
1612 *longGMR Gal4/+*) of the indicated condition (light or dark). Number of recorded flies per  
1613 condition  $\geq 8$ .

1614 (B-H'') Histological sections of retinas of flies exposed for 1-3 (B, D, F, H) or 7 days to constant  
1615 dark (B', D', F', H') or constant light (B'', D'', F'', H'') stained with toluidine blue.  
1616 Arrowheads indicate morphologically abnormal ommatidia. Scale bar: 10  $\mu\text{m}$ .

1617 (J) Quantification of the number of intact ommatidia (expressed in % of the total) meant as  
1618 ommatidia in which all 7 rhabdomeres are visible. Plotted bars show mean  $\pm$  SEM. Statistical  
1619 significance calculated with an ordinary one-way ANOVA with Tukey's multiple comparison  
1620 test: \*  $P < 0.05$ , \*\*  $P < 0.01$ , \*\*\*\*  $P < 0.0001$ . Plotted significance level refers to the difference  
1621 to the control (*cn bw; longGMR Gal4/+*) of the indicated condition (light or dark). Single data  
1622 points represent the average % of intact ommatidia of 3 histological sections of the same animal.  
1623 Analyzed animals: 3.  
1624

### 1625 **Figure 6 SH3GL2 Parkinson's disease coding variant impairs Ca<sup>2+</sup>-induced synaptic** 1626 **autophagy**

1627 (A) Protein alignment showing evolutionary conservation of glycine 276 on the flexible region  
1628 of *Human ENDOA1* and the proximity to the aspartic acid at position 265 (corresponding to  
1629 glutamic acid 264 in *Human ENDOA1*).

1630 (B-C') Representative live confocal images of NMJ boutons of *endoA*<sup>-/-</sup> animals expressing  
1631 *Atg8<sup>mCherry</sup>* at endogenous level and *SH3GL2*<sup>WT</sup> or *SH3GL2*<sup>G276V</sup> under a pan-neuronal driver

1632 (*nSyb-Gal4*). Non-stimulated animals were incubated for 30 min in HL3, Nefi (10  $\mu$ M) and  
1633 NAS (100  $\mu$ M) solution (B, C). Stimulated animals were incubated for 30 min in HL3 solution  
1634 containing Nefi (10  $\mu$ M), NAS (100  $\mu$ M) and CaCl<sub>2</sub> (1 mM) (B', C'). Fluorescence intensities  
1635 shown using scale (0-65535 gray value) indicated in (B'). Arrowheads indicate Atg8<sup>mCherry</sup>  
1636 positive autophagosomes. Scale bar: 5  $\mu$ m.

1637 (D) Quantification of the number of Atg8<sup>mCherry</sup> dots per NMJ area. Error bars represent mean  
1638  $\pm$  SEM. Statistical significance was calculated with an ordinary two-way ANOVA with Tukey's  
1639 multiple comparison test: \*  $P < 0.05$ , ns, not significant,  $n \geq 8$  larvae (32 NMJs) per genotype.  
1640 Significance level displayed above 'Nefi' column refers to comparison with 'Nefi' treatment  
1641 (unstimulated) on control animals.

1642 (E-F') Representative images of Airyscan confocal single slice sections of synaptic boutons of  
1643 *endoA*<sup>-/-</sup> larvae expressing *SH3GL2*<sup>WT</sup> (E, E') and *SH3GL2*<sup>G276V</sup> (F, F') (under the control of the  
1644 pan-neuronal driver *nSyb-Gal4*) labelled with anti-ENDOA1 antibody. Scale bar: 5  $\mu$ m.

1645 (G) Quantification of the ENDOA1 integrated intensity across genotypes showing ratio of  
1646 ENDOA1 intensity at the membrane to that within the cytosol. Error bars represent mean  $\pm$   
1647 SEM; statistical significance was calculated with an ordinary two-way ANOVA with Tukey's  
1648 multiple comparison test: \*\*\*\*  $P < 0.0001$ , ns, not significant,  $n \geq 6$  larvae (24 NMJs) per  
1649 genotype. Significance levels displayed above 'Nefi' column refer to comparison with 'Nefi'  
1650 treatment (unstimulated) on control animals.

1651

## 1652 **Figure 7 Expression of SH3GL2<sup>G276V</sup> in differentiated dopaminergic neurons** 1653 **recapitulates findings from *Drosophila* synapses**

1654 (A) Schematic representation of gene editing strategy to knock-in the G276V mutation.

1655 (A') Sanger sequencing of a single gene edited clone showing successful homozygous editing  
1656 of the indicated nucleotide.

1657 (B) Representative maximum projection confocal images of terminally differentiated (55-60  
1658 days) *SH3GL2*<sup>WT</sup> vmDAN stained with the ventral midbrain marker FOXA2, dopaminergic  
1659 marker TH and neuronal marker MAP2. (B') Quantification of the amount of dopaminergic  
1660 neurons over the total number of neurons in the field of view expressed as percentage of  
1661 TH<sup>+</sup>/MAP2<sup>+</sup> neurons. Scale bar: 100  $\mu$ m. Error bars represent mean  $\pm$  SEM. Statistical  
1662 significance calculated with an ordinary one-way ANOVA with Tukey's multiple comparison  
1663 test: ns, not significant. Single data points representing single confocal images. Data from three  
1664 independent vmDAN differentiations (circles and empty/filled triangles represent independent  
1665 differentiations).

1666 (C) Representative maximum projection confocal images of terminally differentiated (55-60  
1667 days) *SH3GL2*<sup>WT</sup> vmDAN stained with anti-TH and anti-LC3B antibodies. Arrowheads  
1668 indicate LC3B<sup>+</sup> autophagosomes within TH<sup>+</sup> neurites. Scale bar: 20  $\mu$ m. Insert box shows zoom  
1669 of the region indicated within the dotted rectangle where multiple LC3B<sup>+</sup> dots are visible.

1670 (C') Quantification of the number of LC3B<sup>+</sup> autophagosomes within TH<sup>+</sup> neurites normalized  
1671 on the total TH<sup>+</sup> neurites length in the field of view. Error bars represent mean  $\pm$  SEM.  
1672 Statistical significance calculated with a student t-test. \*\*\*  $P < 0.001$ . Single data points  
1673 represent single confocal images. Data from three independent vmDAN differentiations (circles  
1674 and empty/filled triangles represent independent differentiations).

*Atg8<sup>mCherry</sup>*

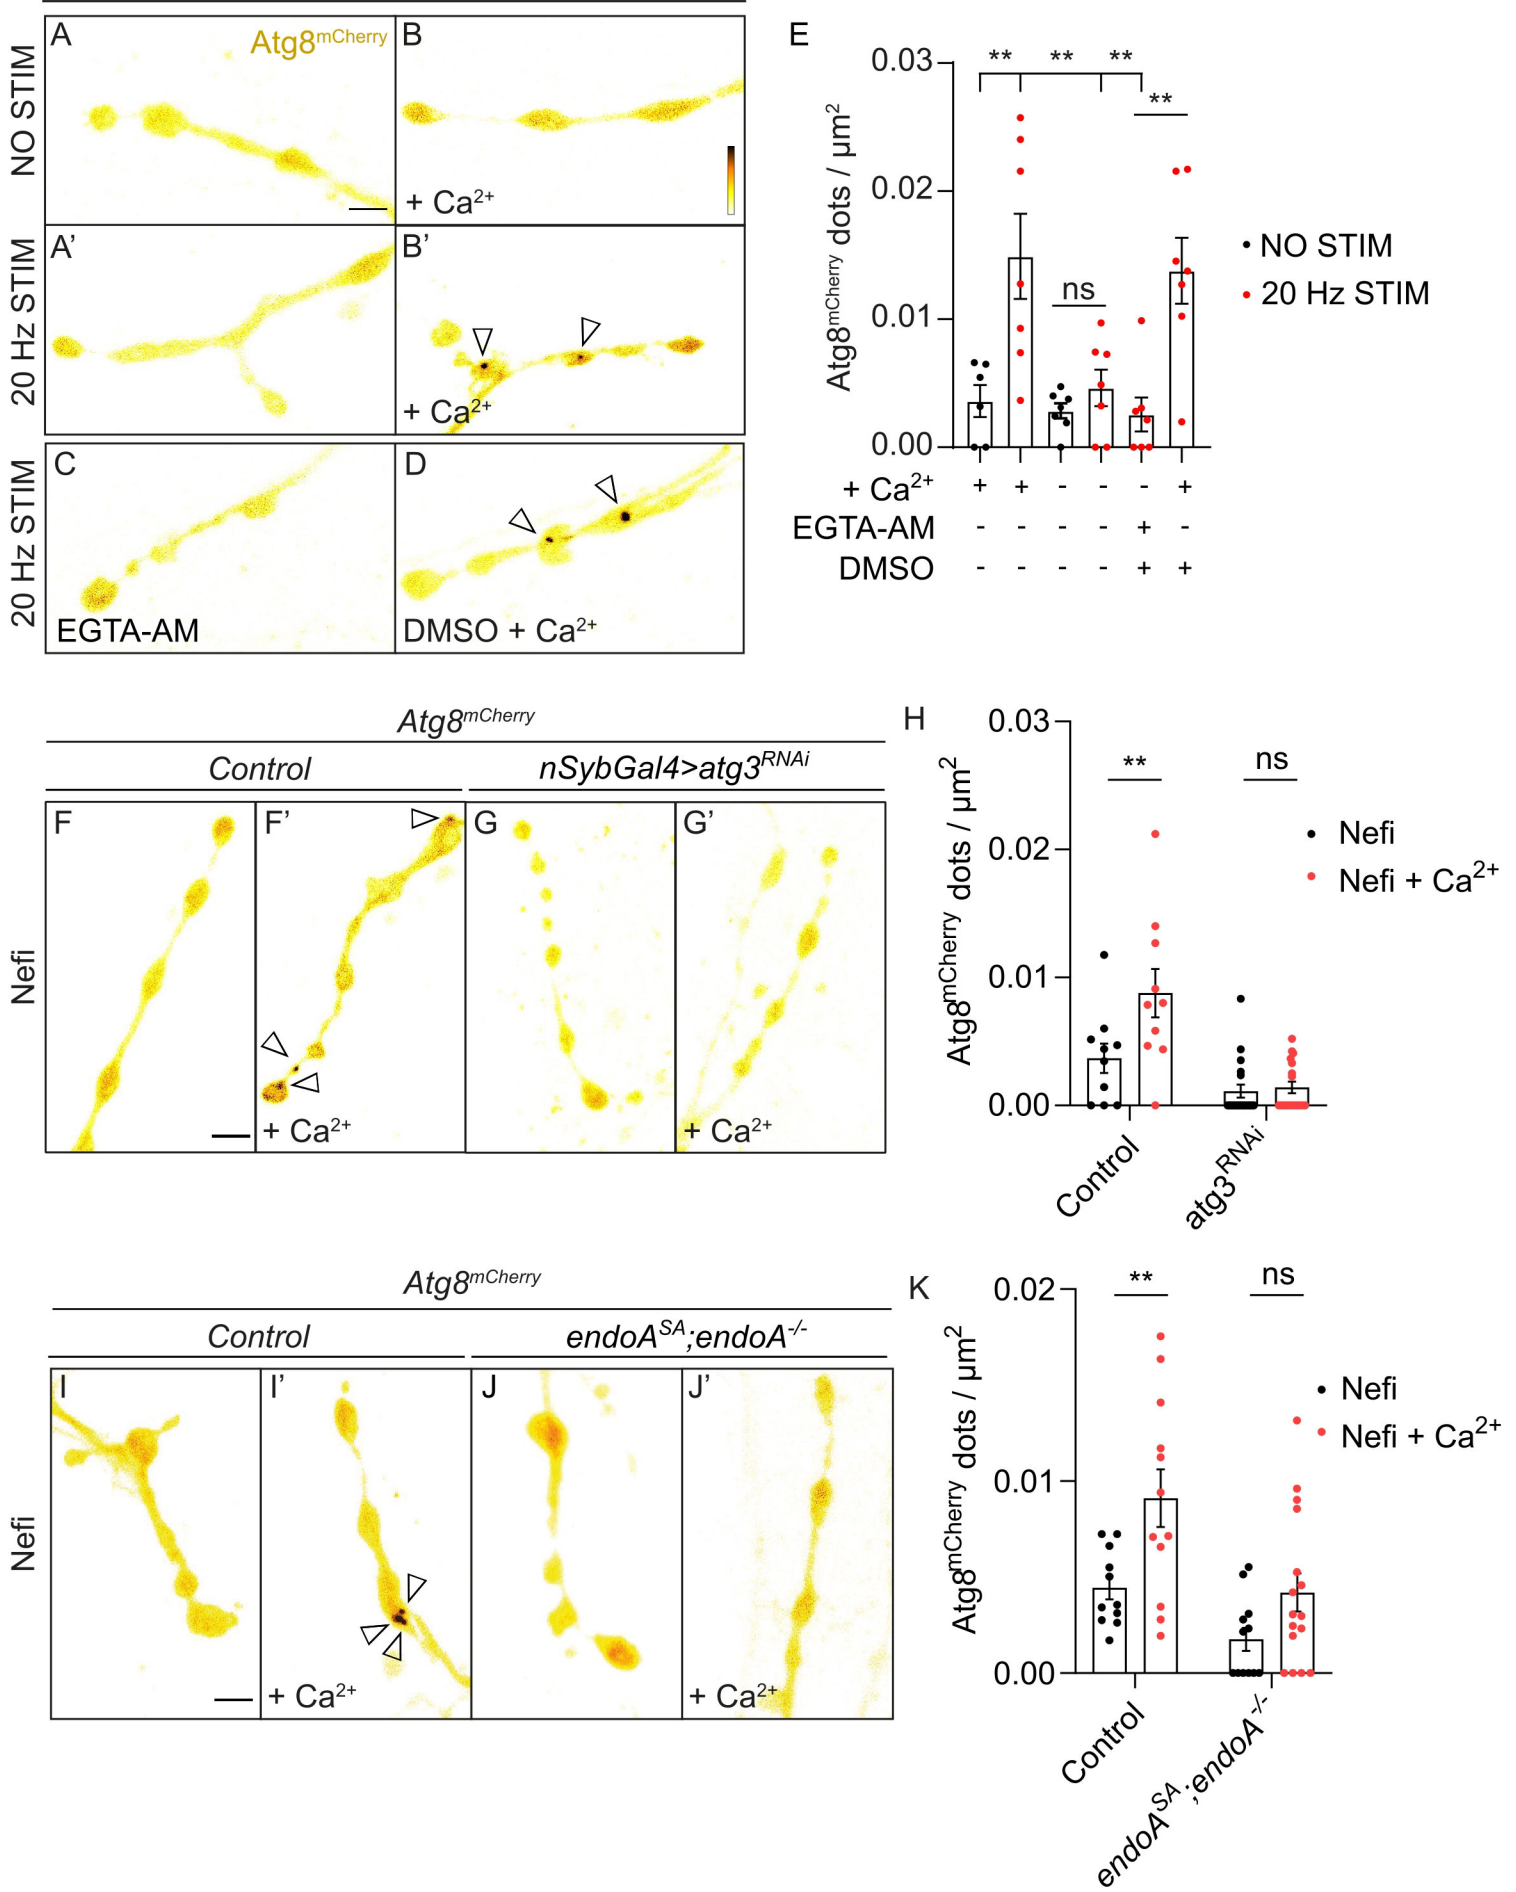

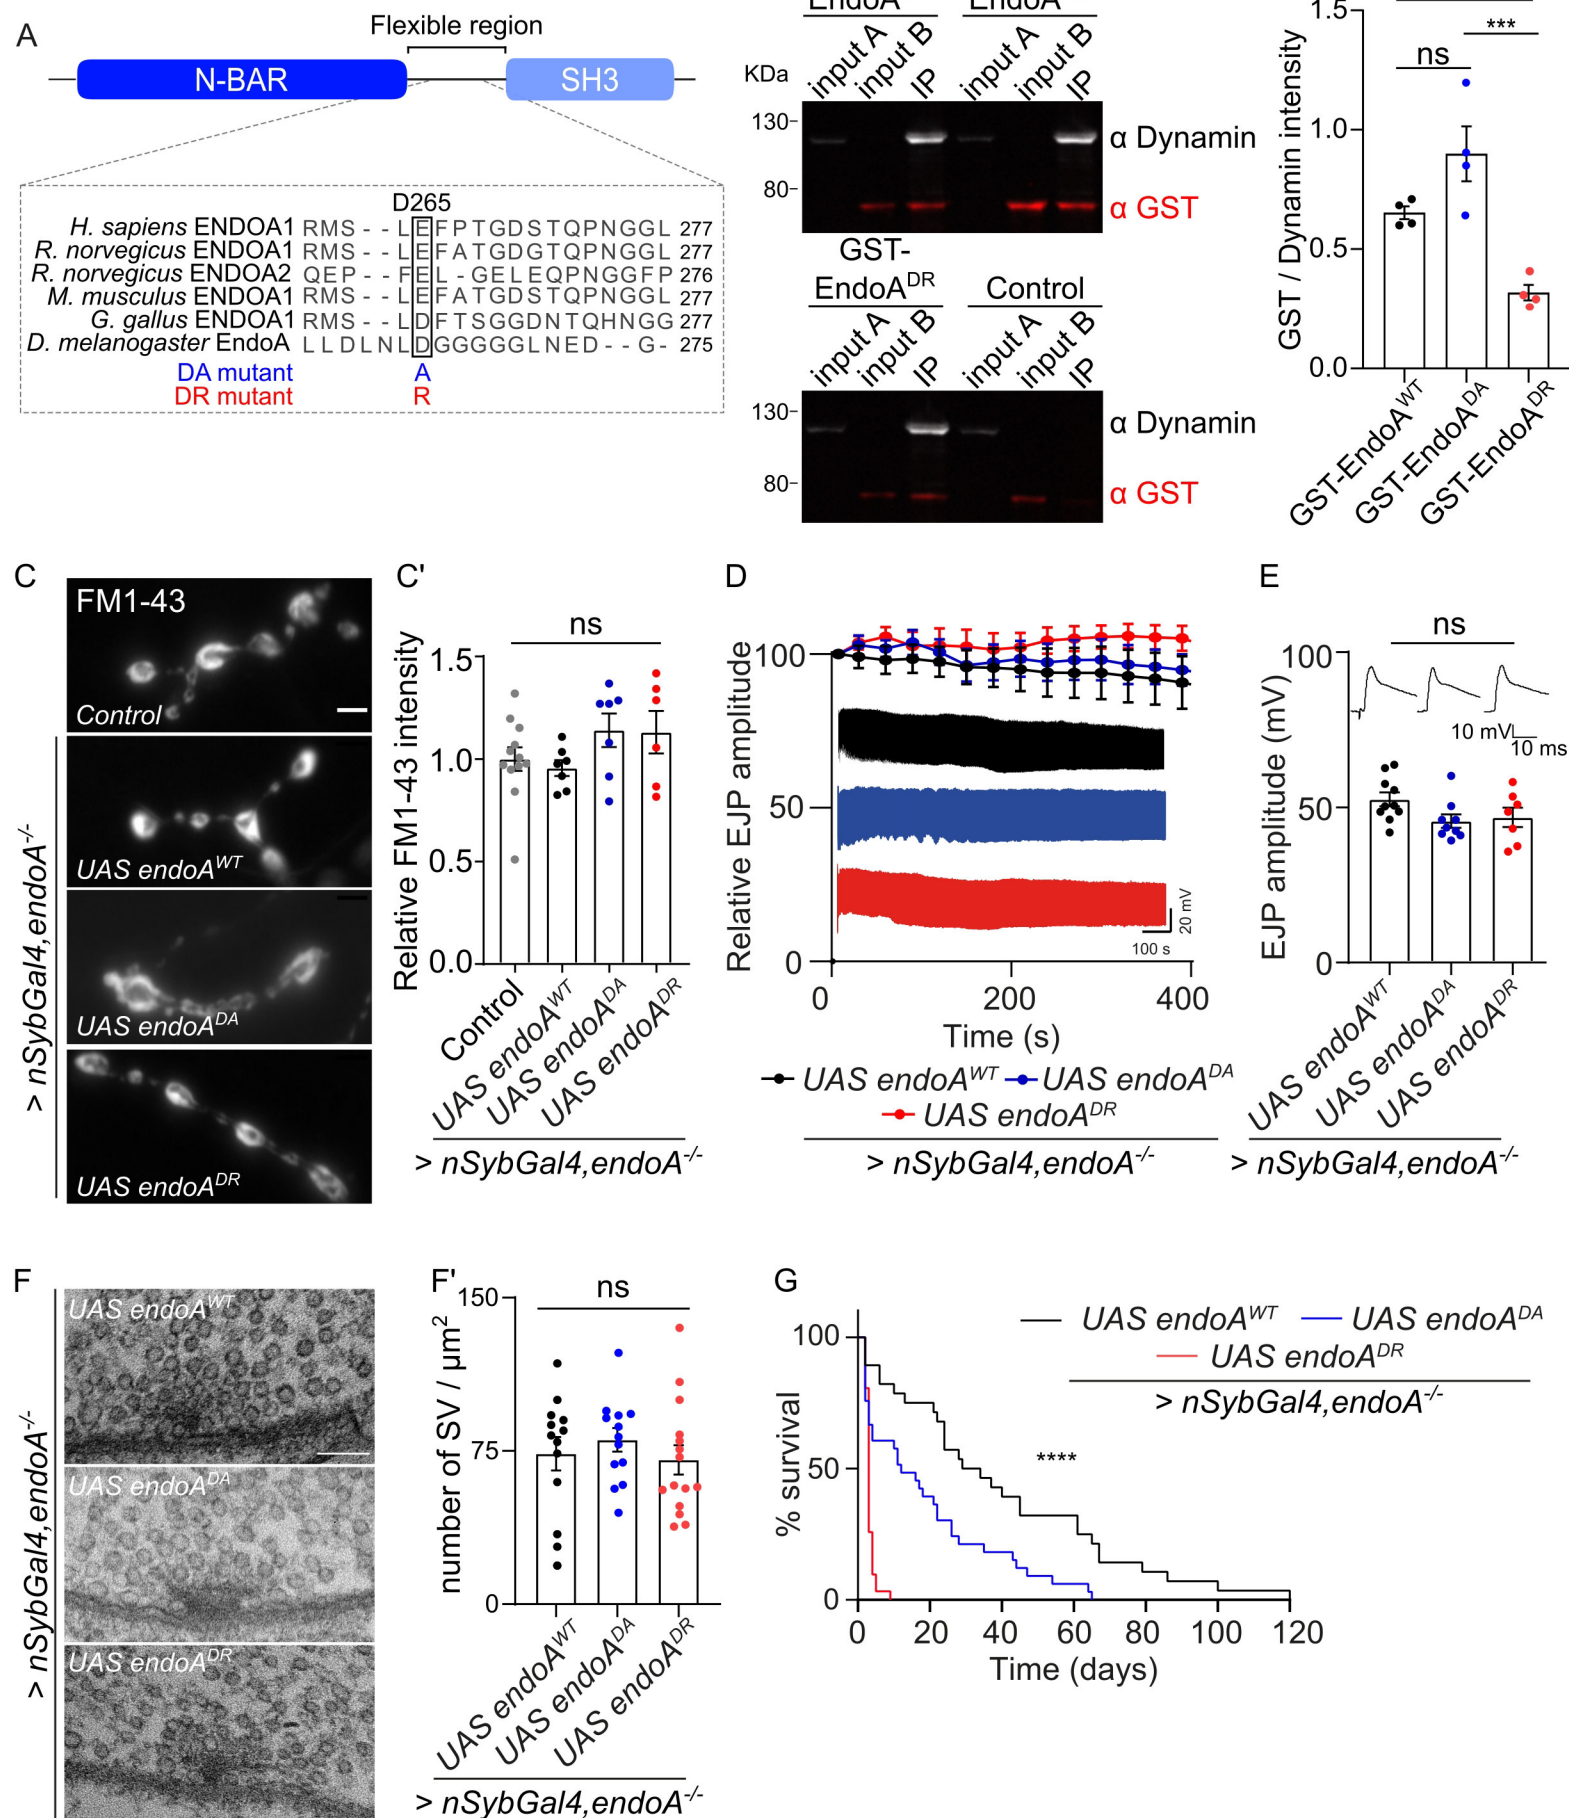

Control *UAS endoA<sup>WT</sup>* *UAS endoA<sup>DA</sup>* *UAS endoA<sup>DR</sup>*

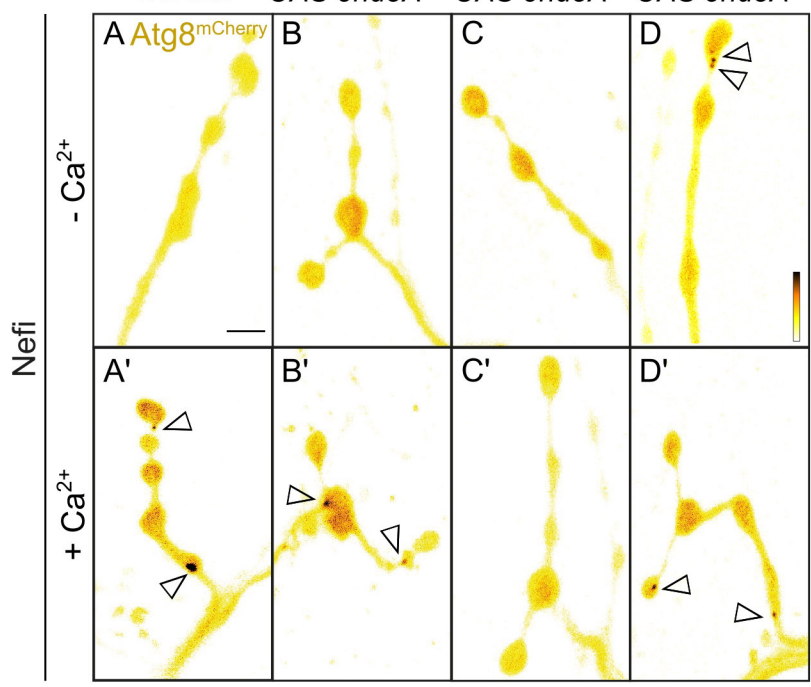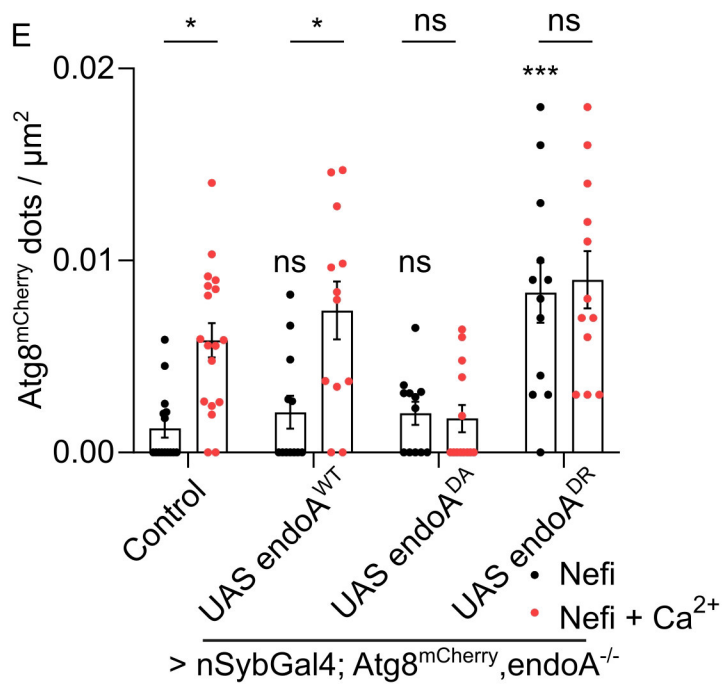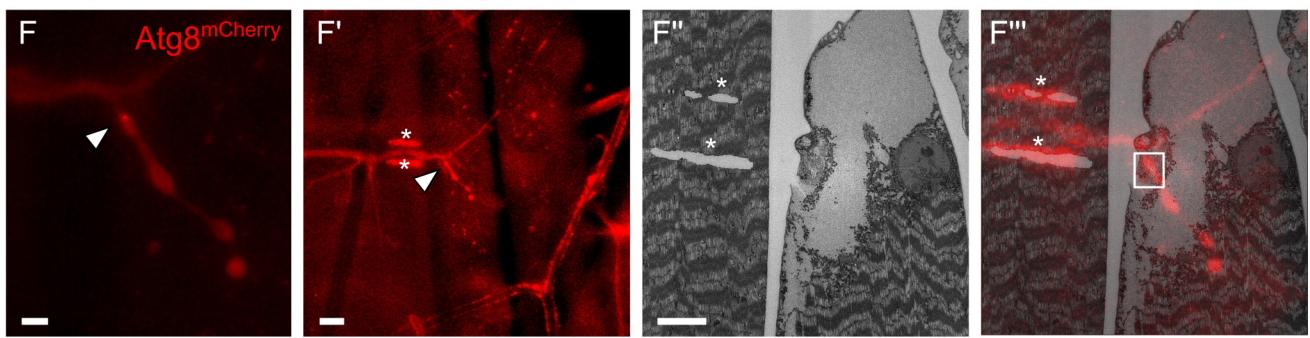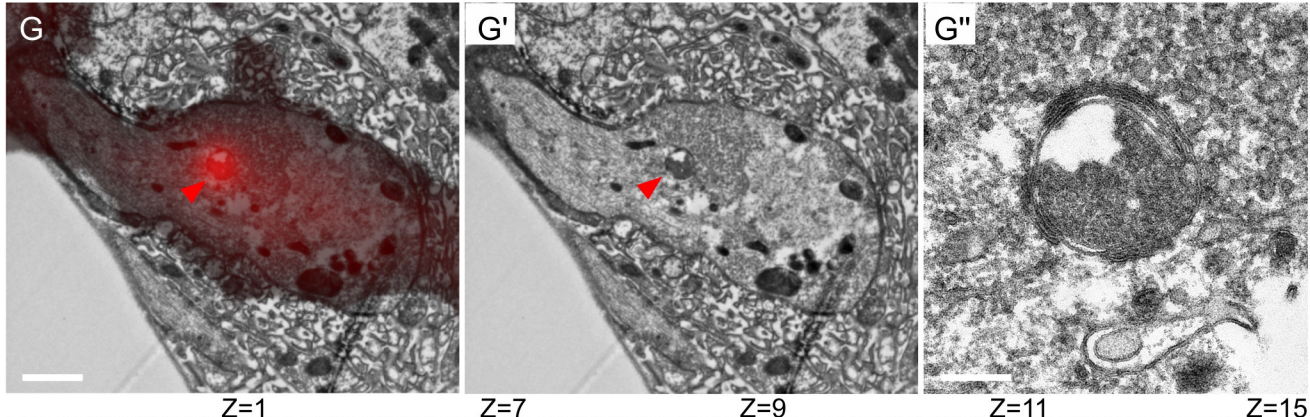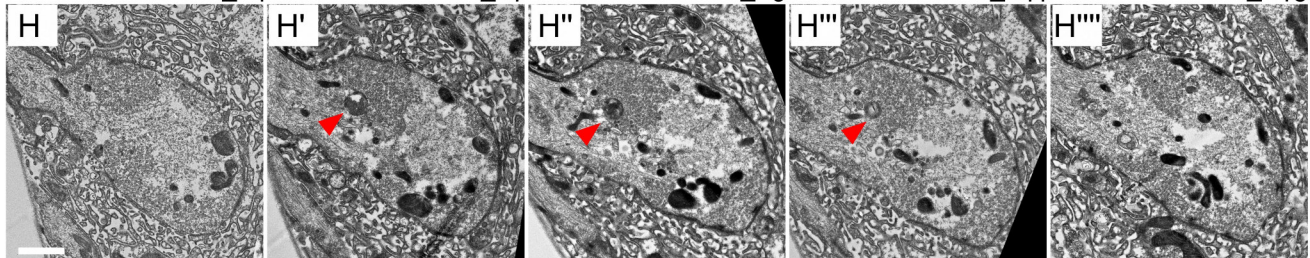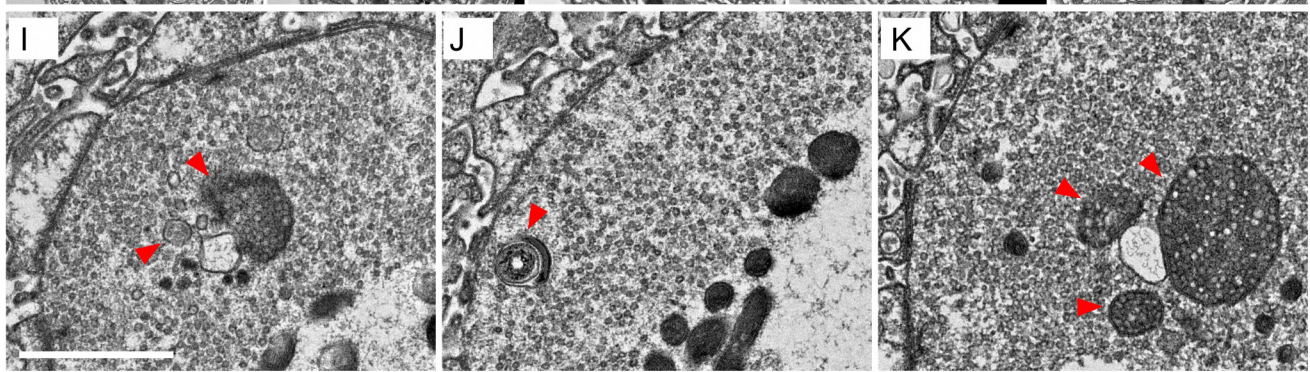

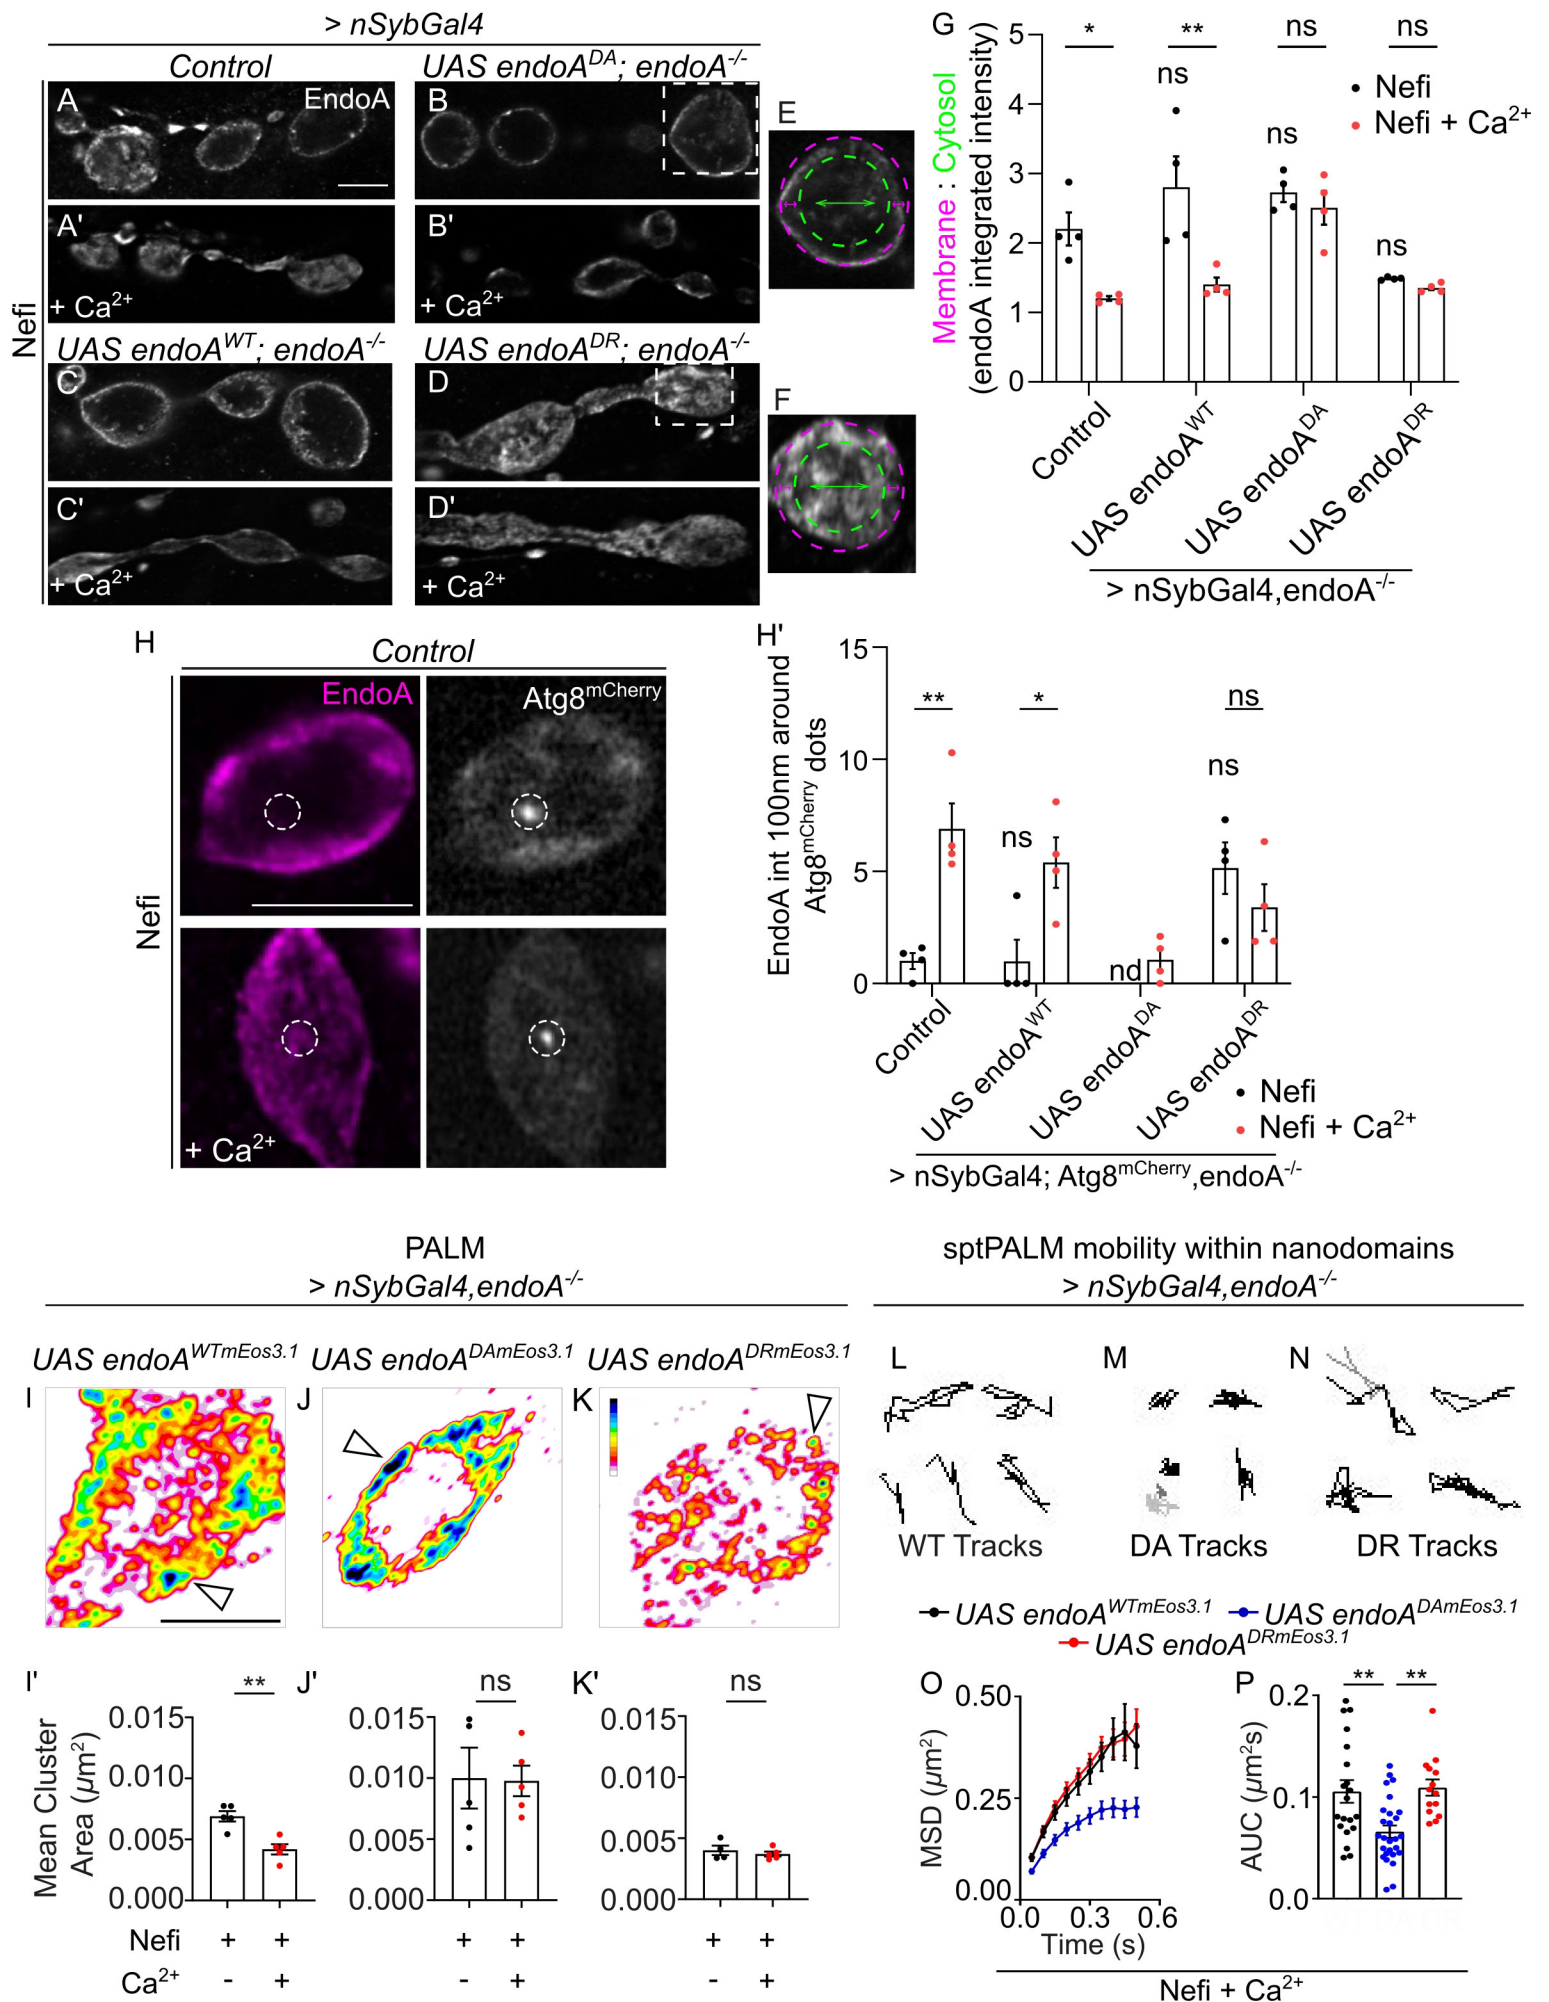



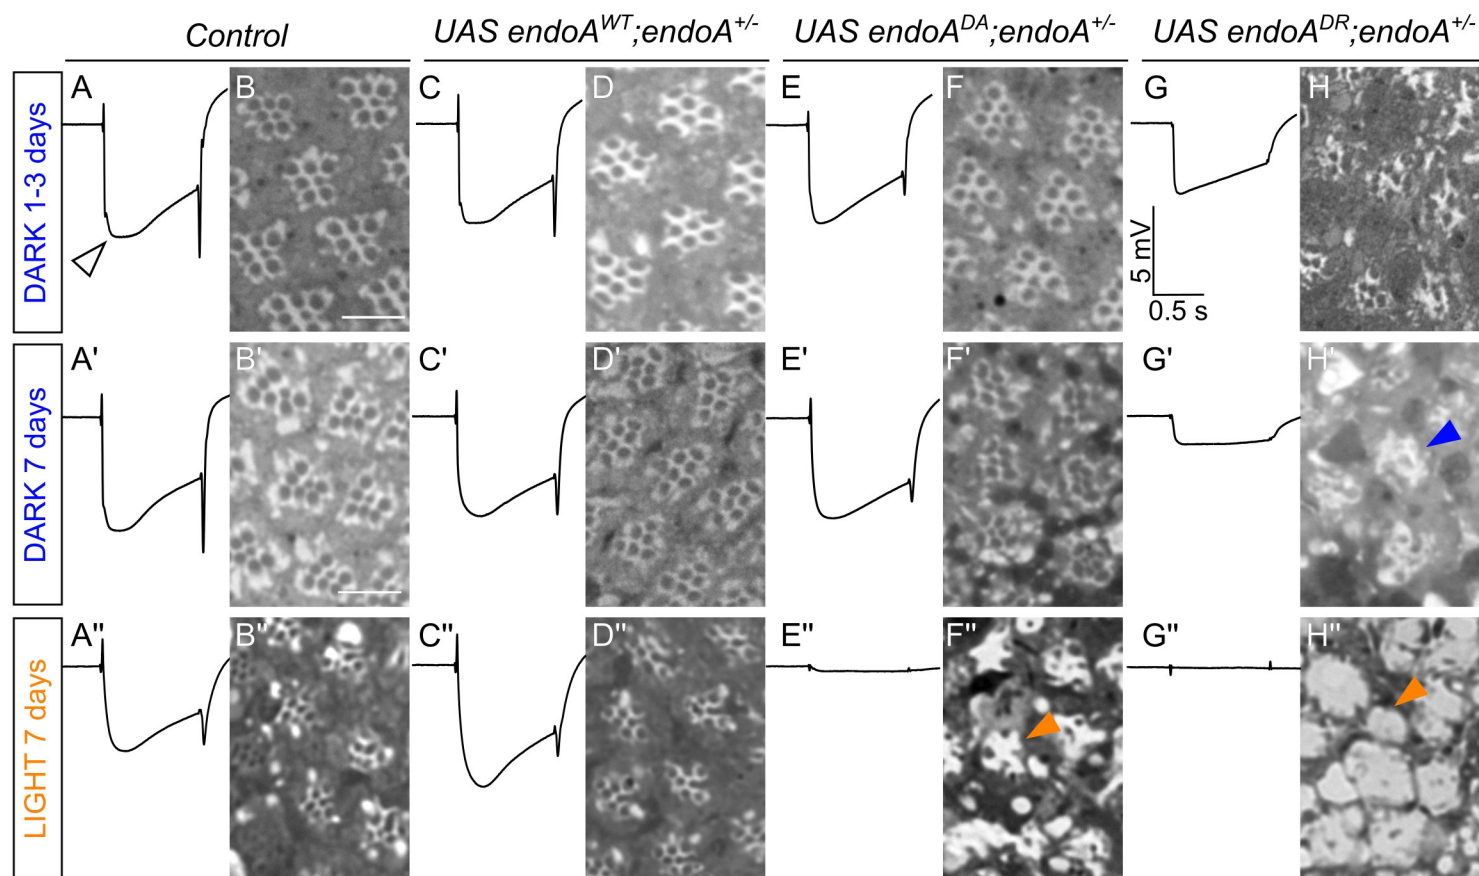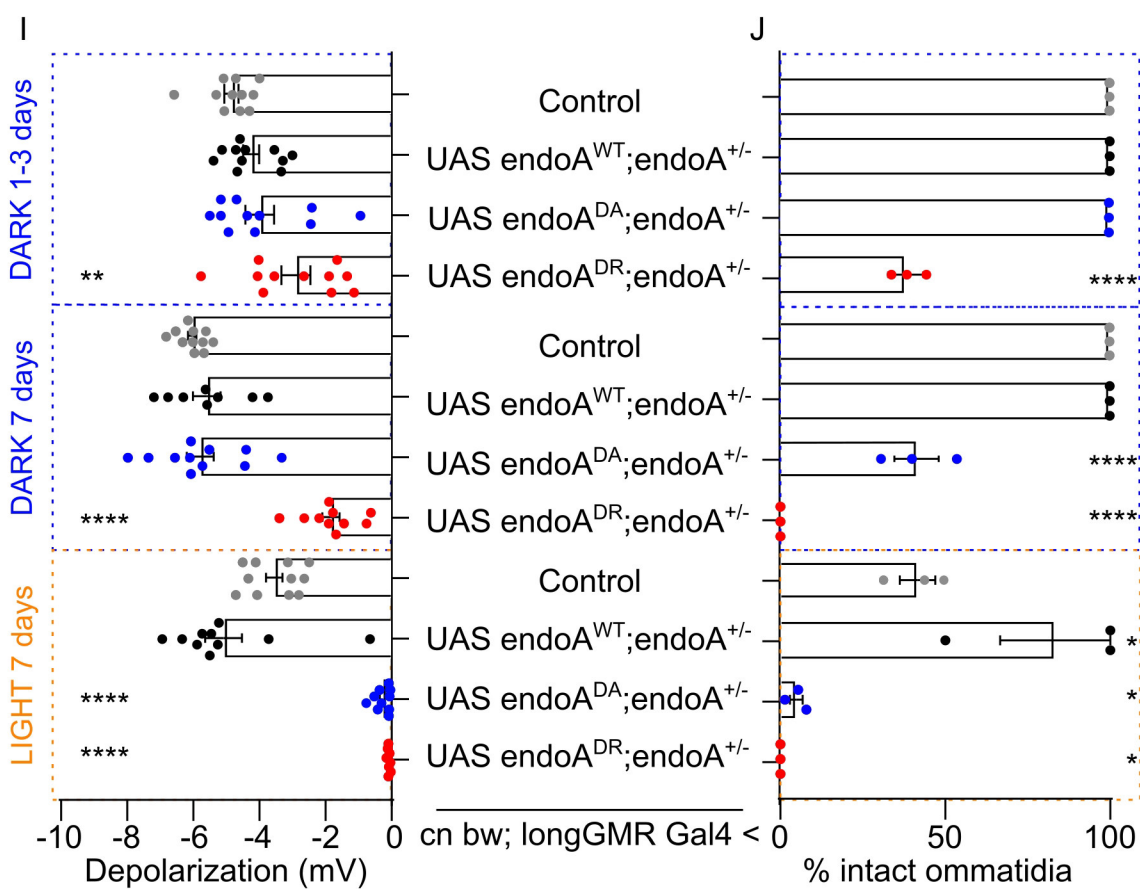

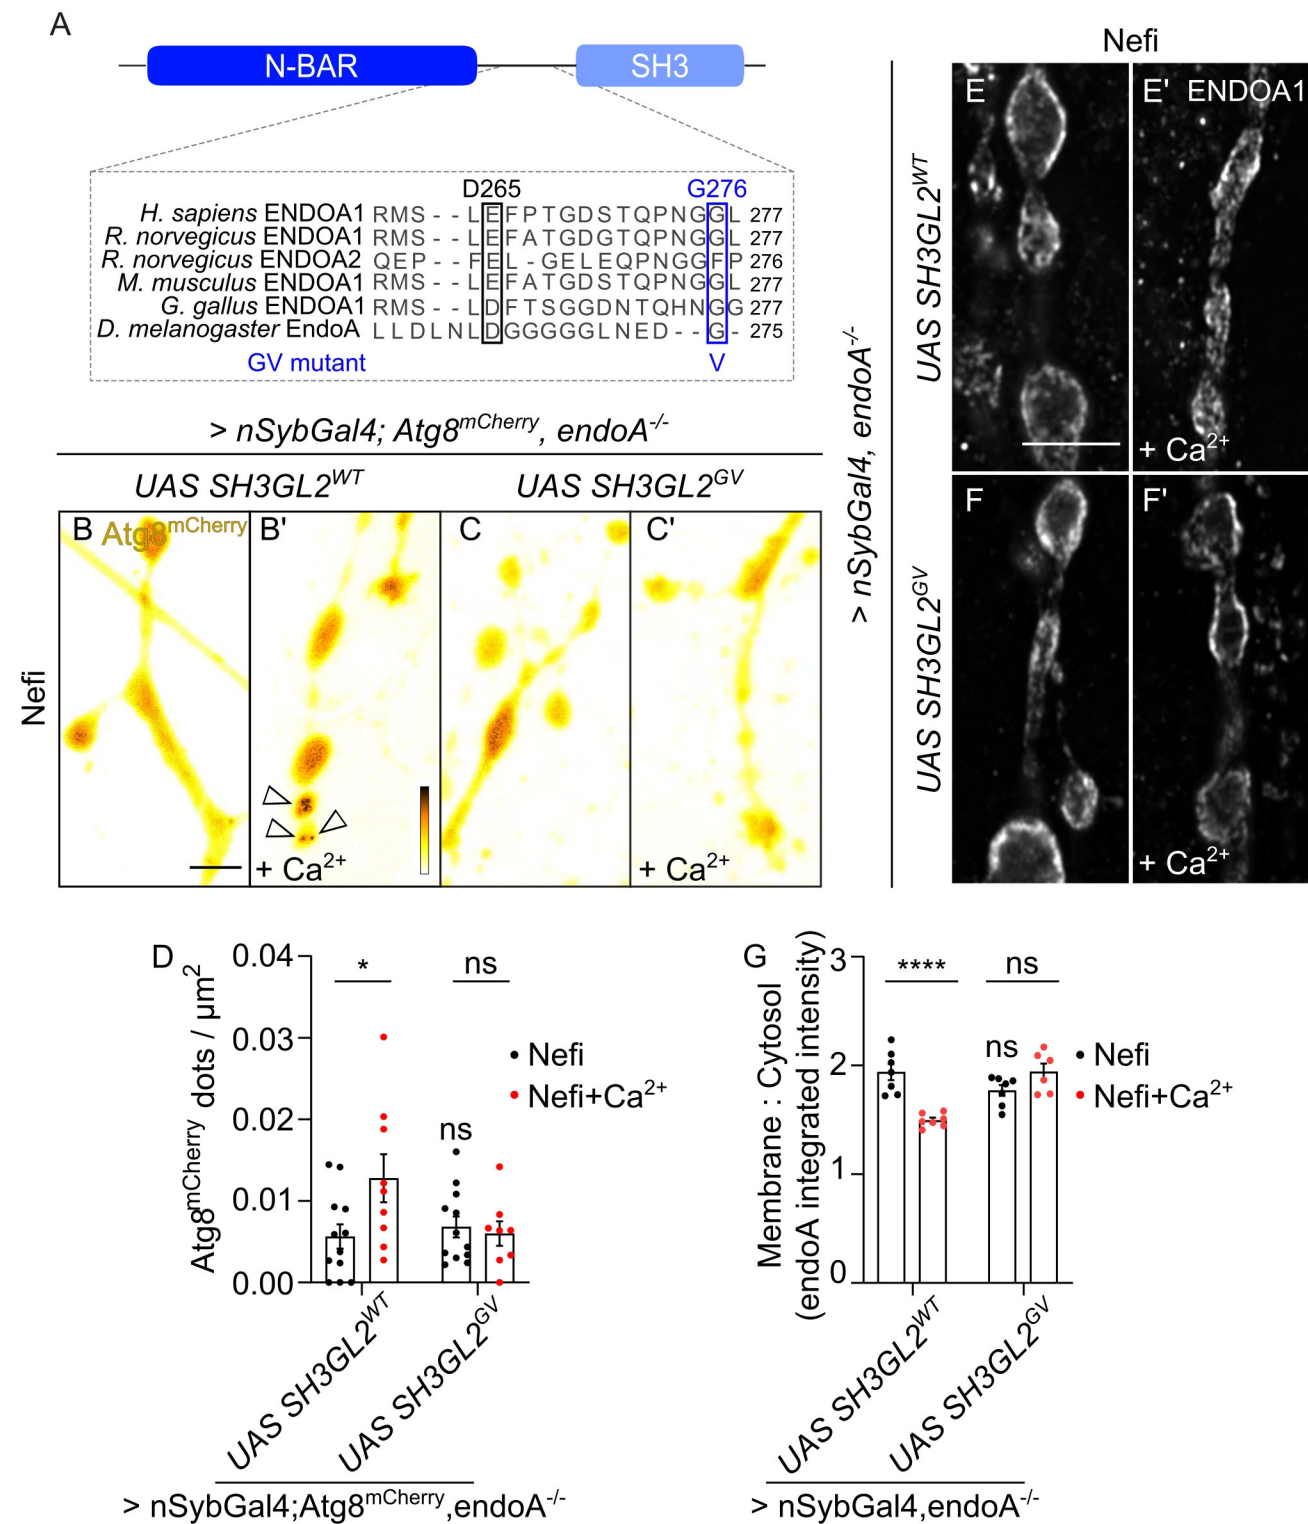

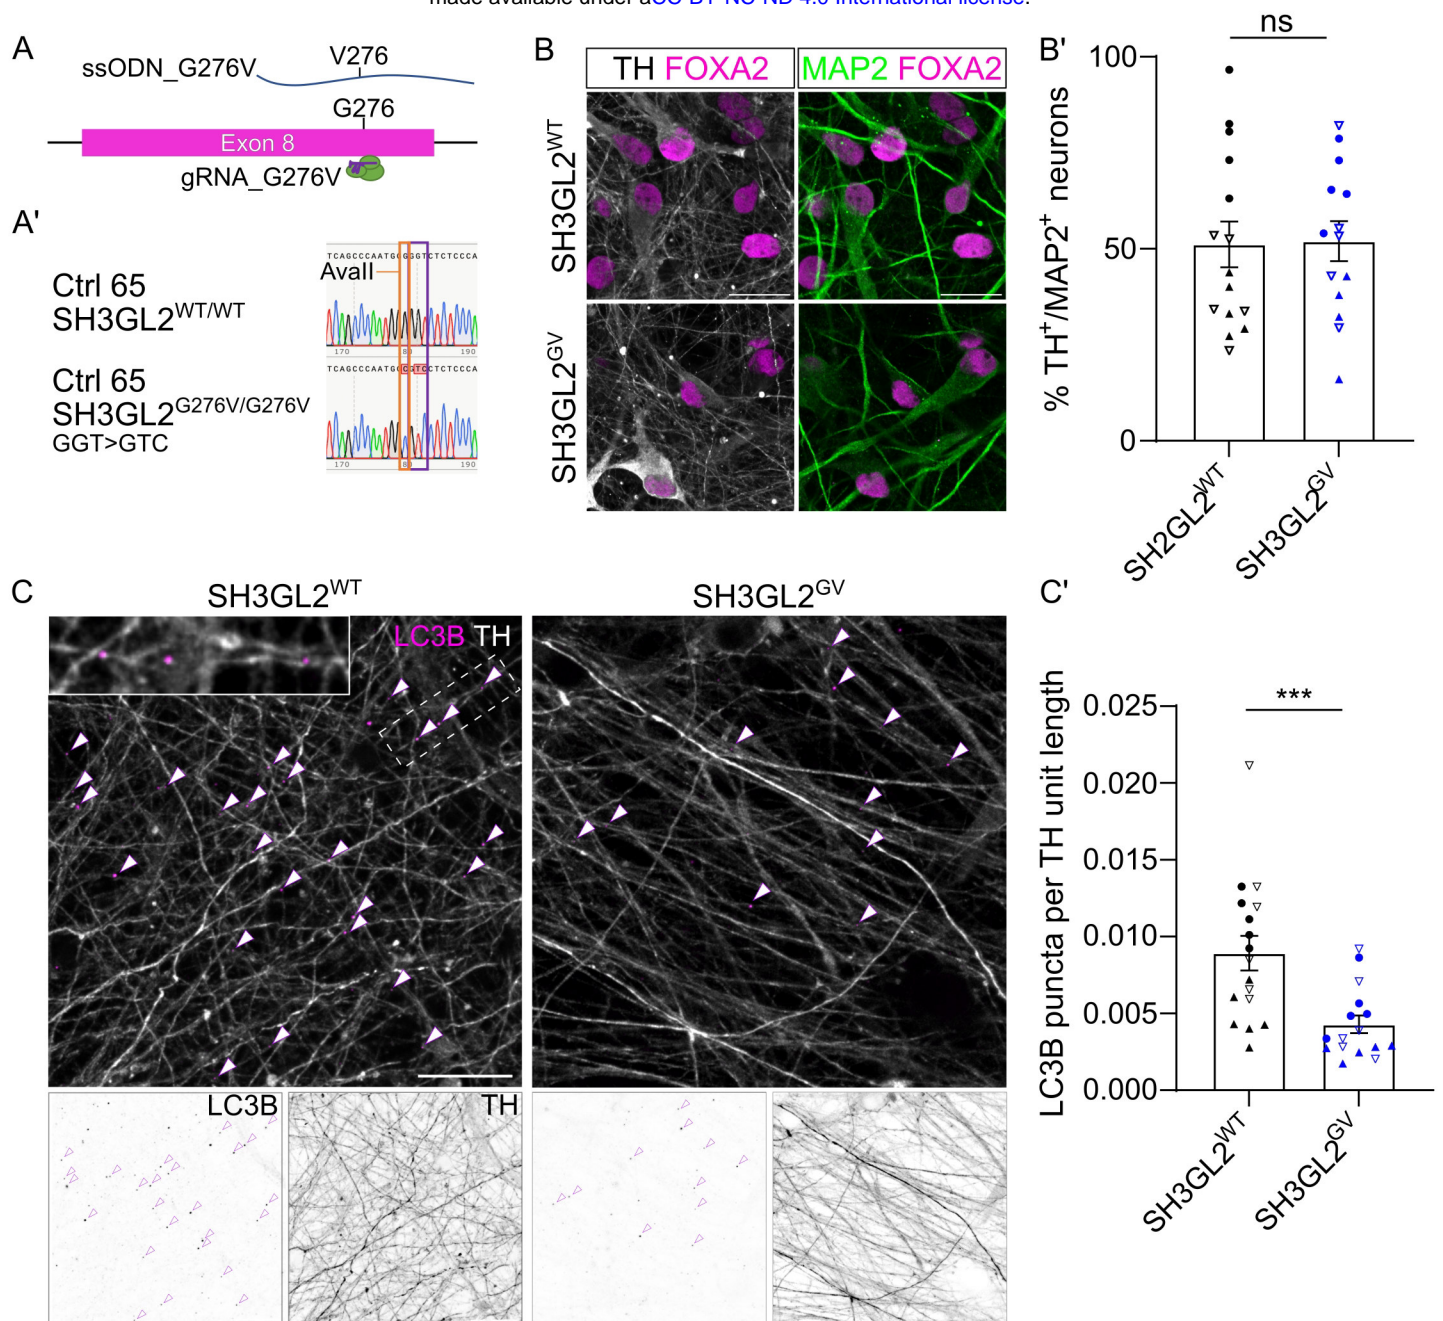

Source: https://biorxiv.org/content/10.1101/2022.04.29.490010v1.full.pdf
