# Supplementary material for: EndophilinA-dependent coupling between activity-dependent calcium influx and synaptic autophagy is disrupted by a Parkinson-risk mutation
Source: bioRxiv or medRxiv preprint supplement (doi:10.1101/2022.04.29.490010), 2022-04-30
Supplement: Supplementary file [file media-1.pdf]

Figure S1

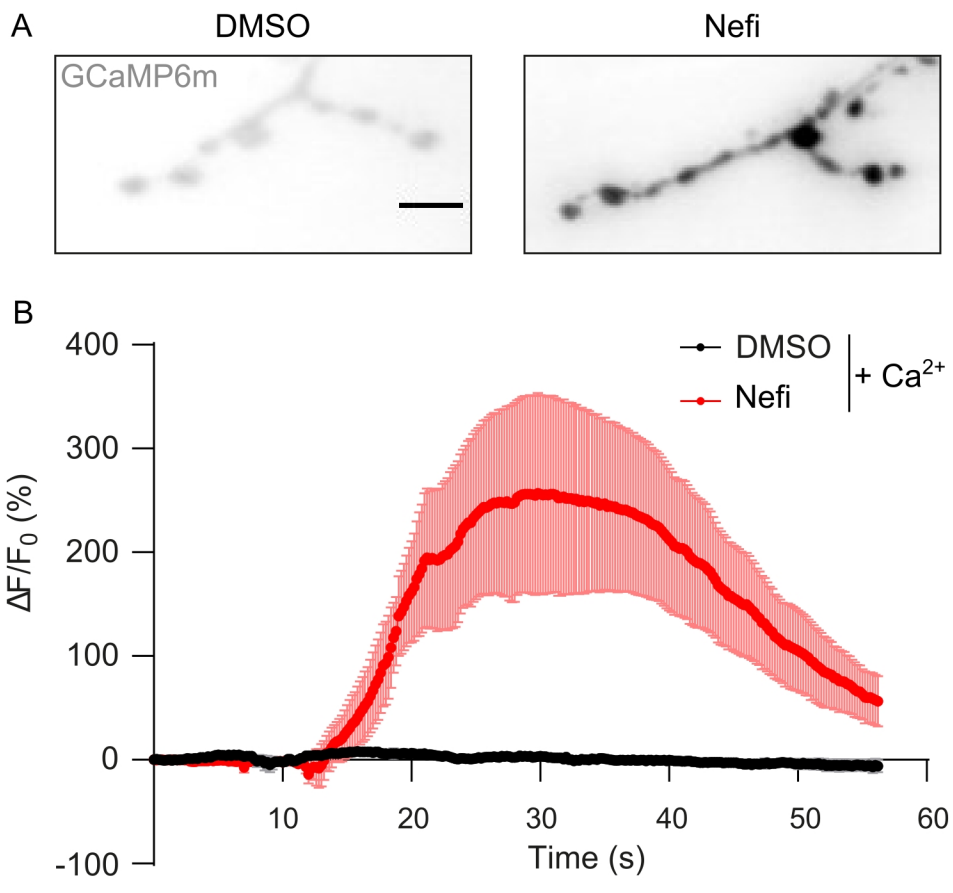

Figure S2

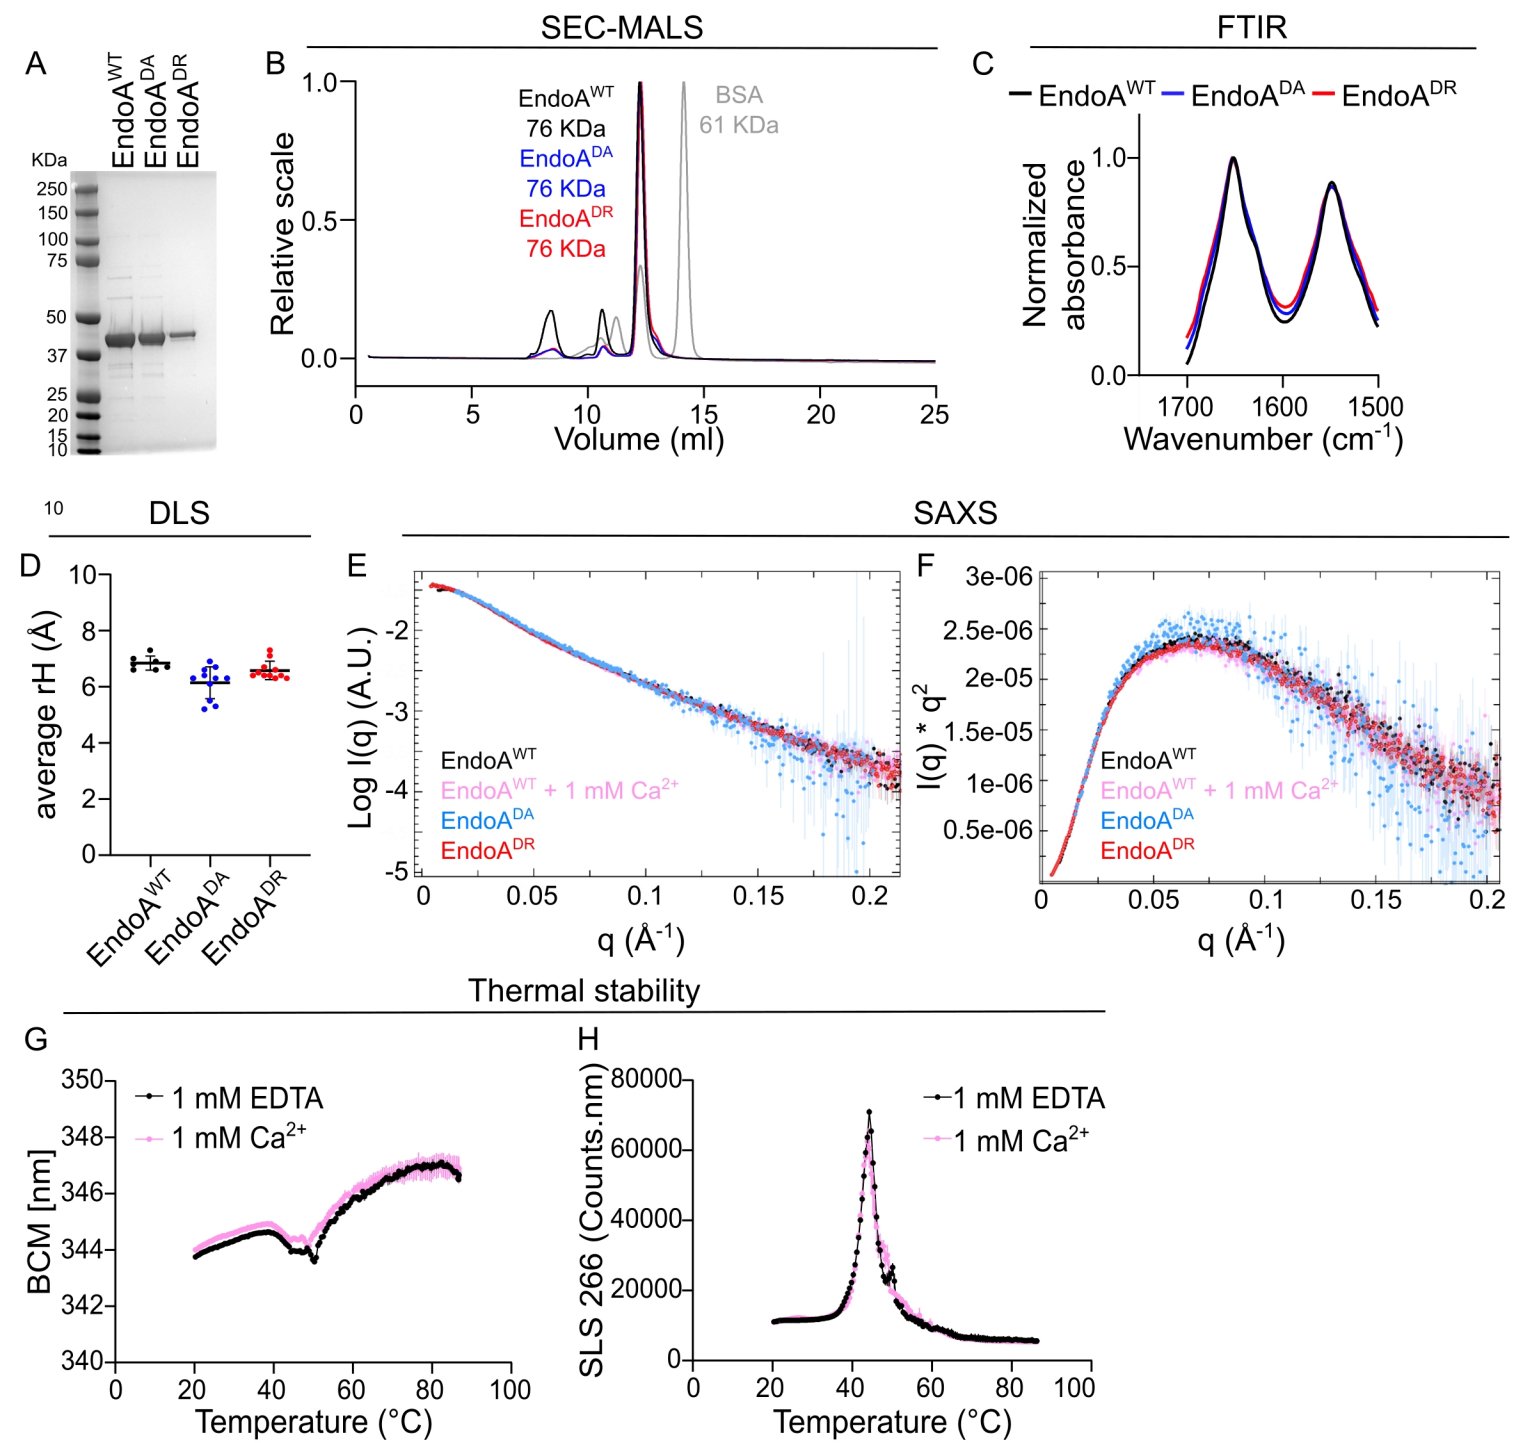

Figure S3

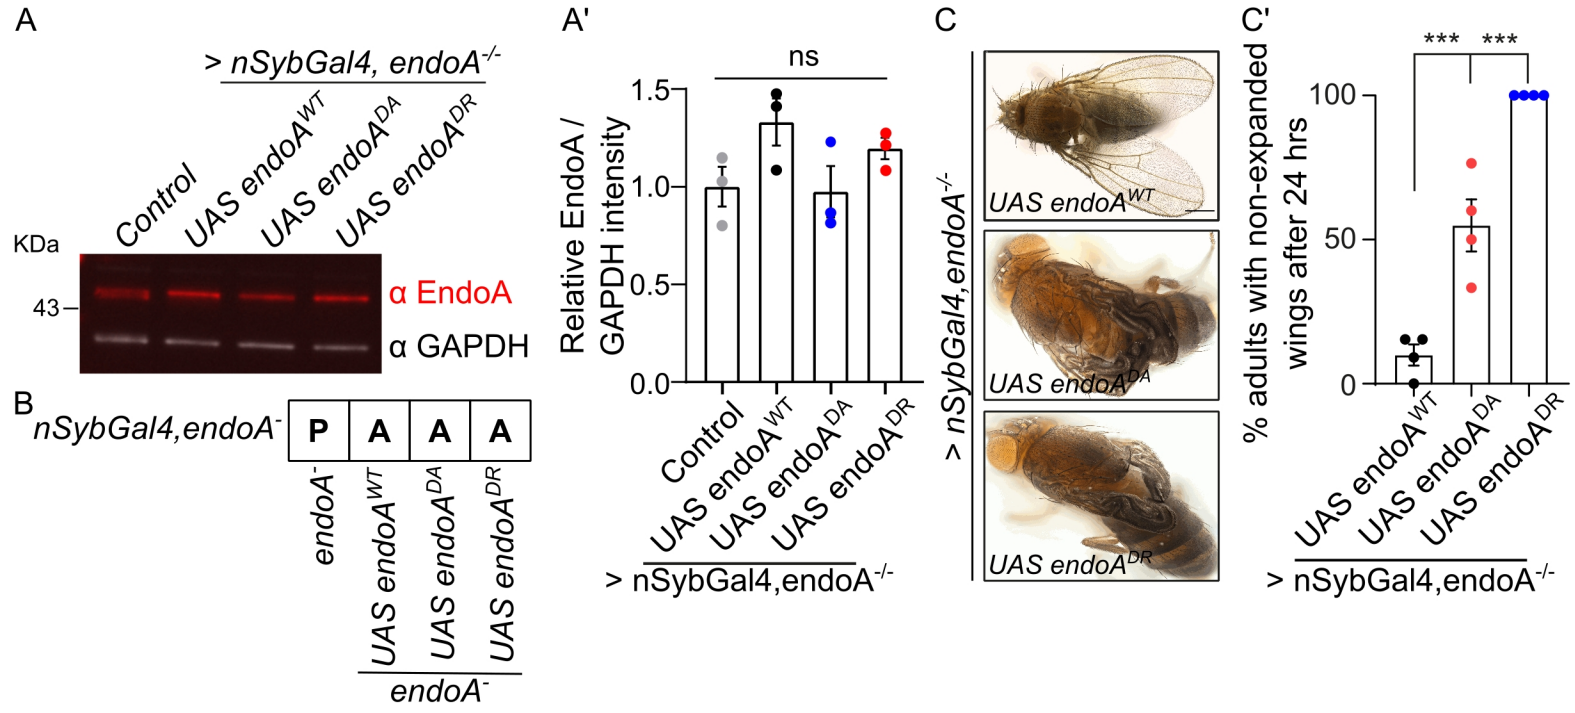

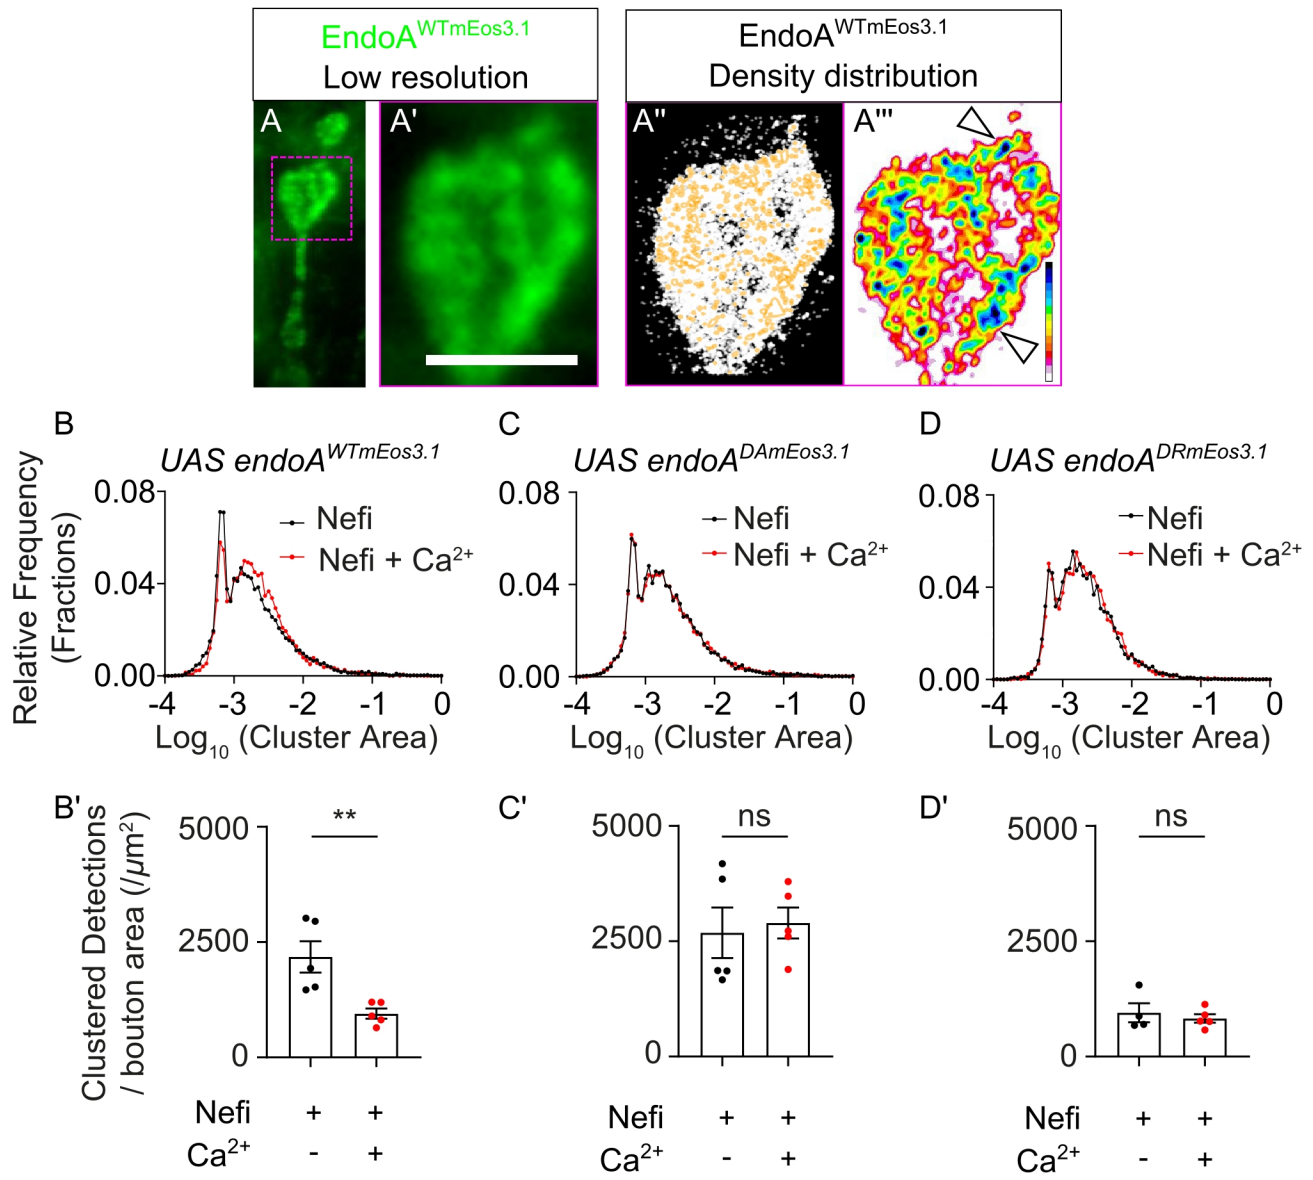

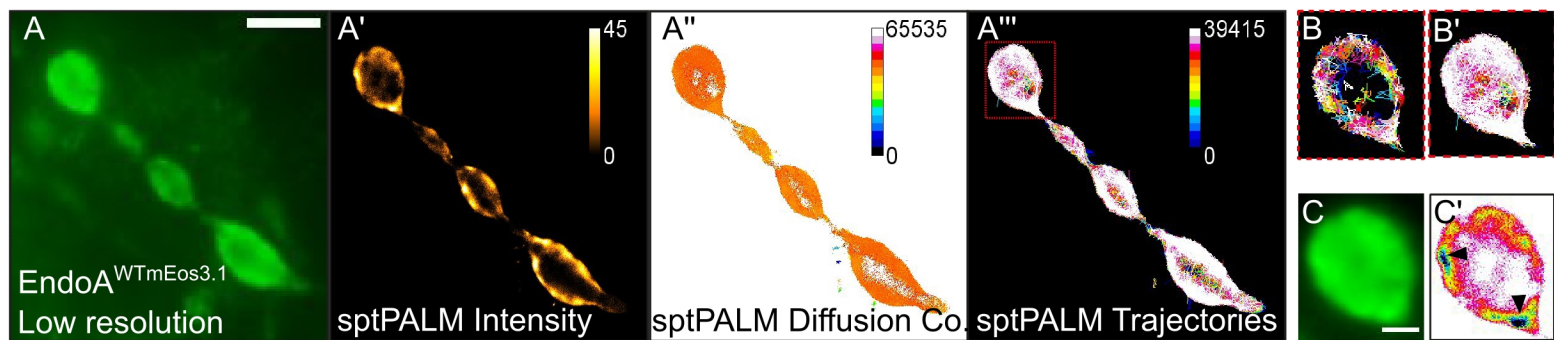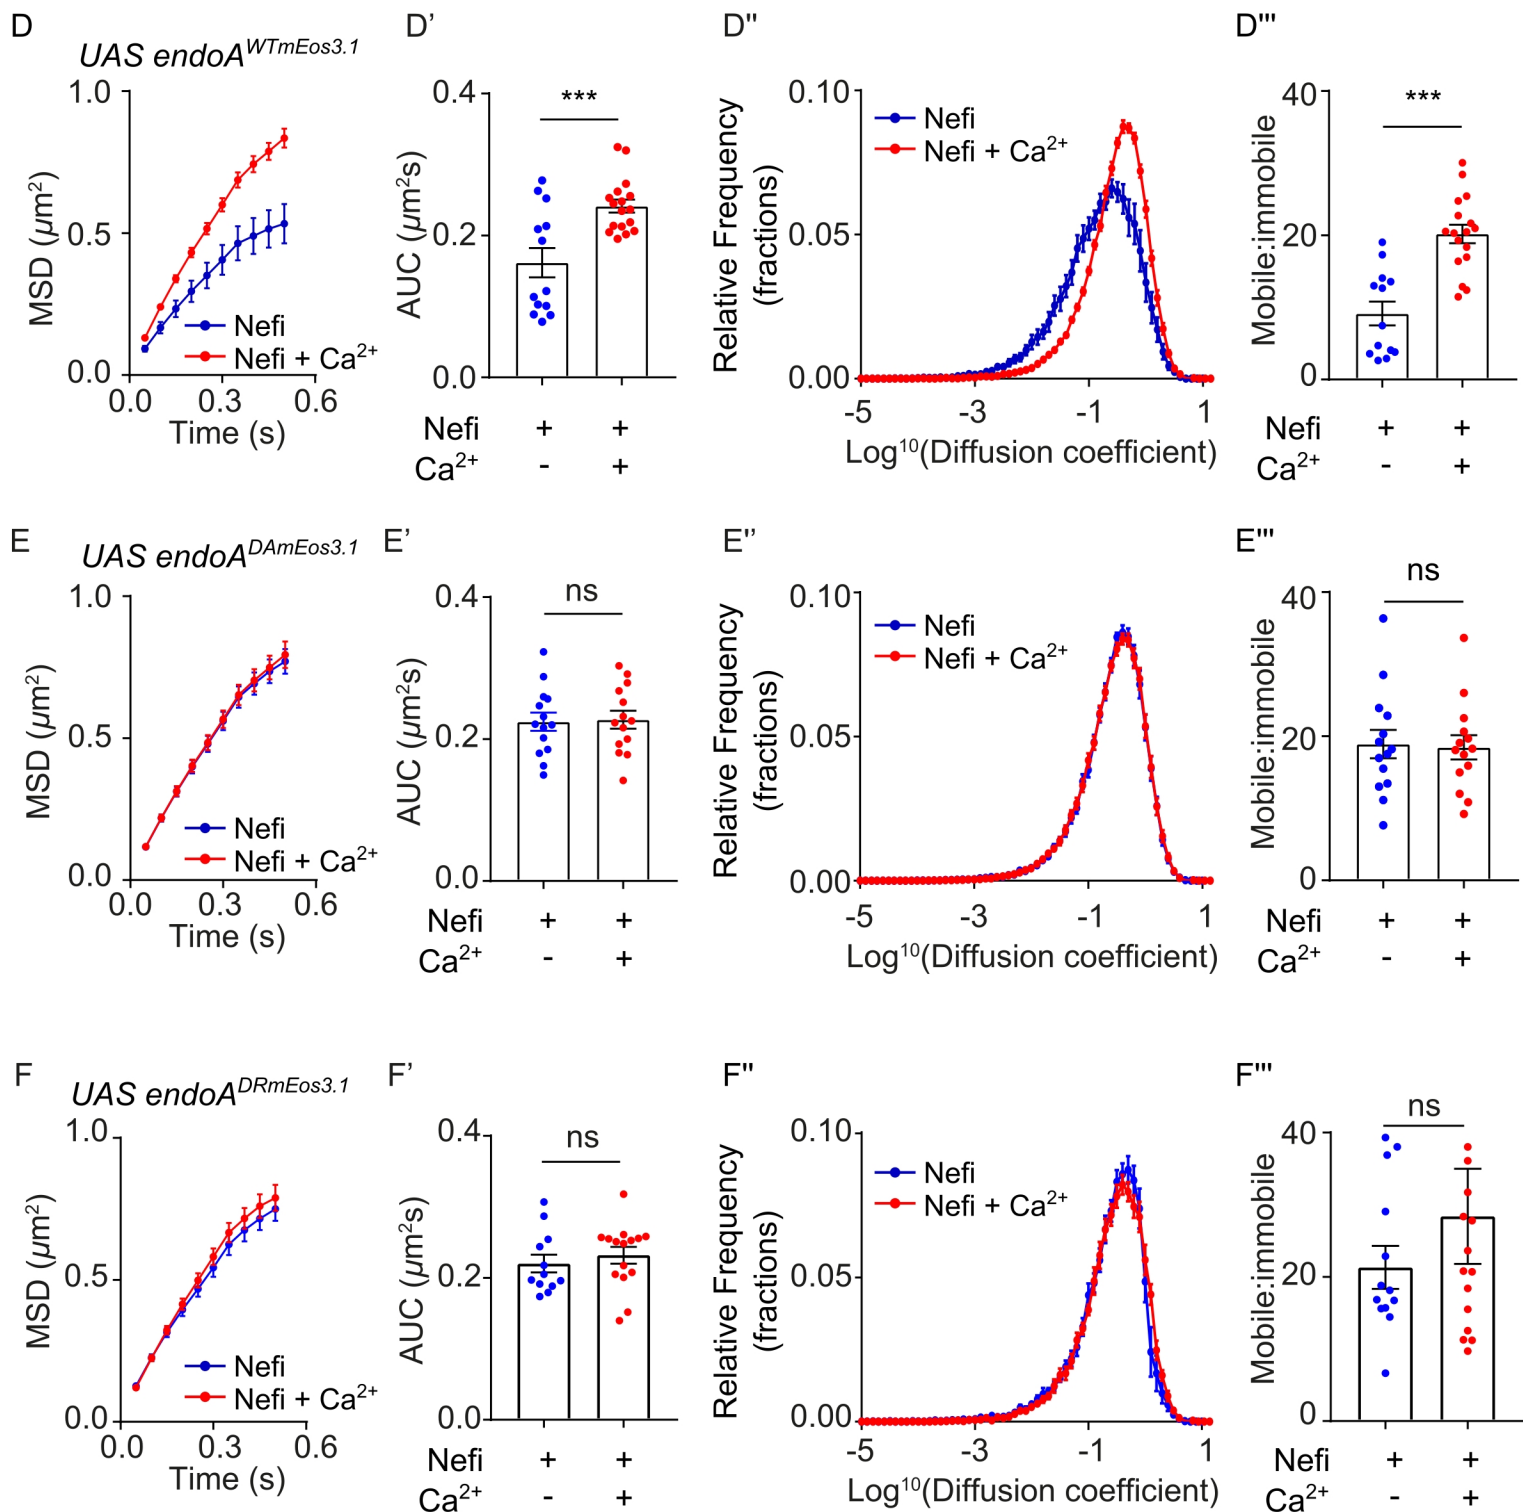

Figure S6

SAXS

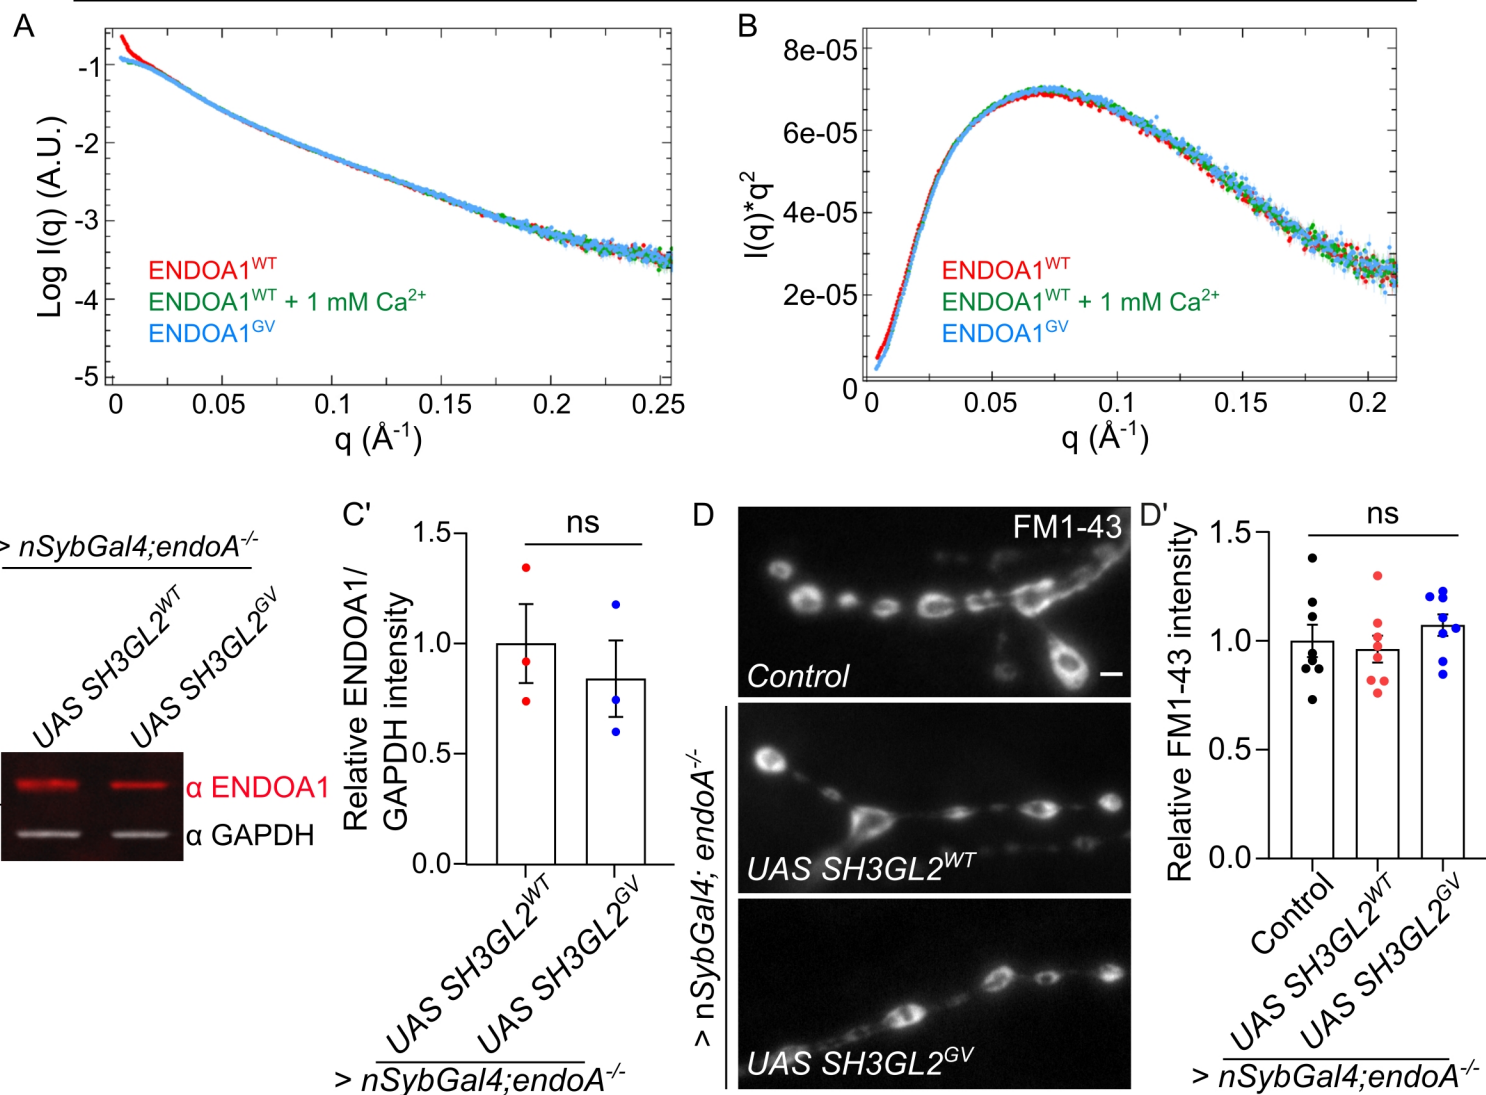

Figure S7

A

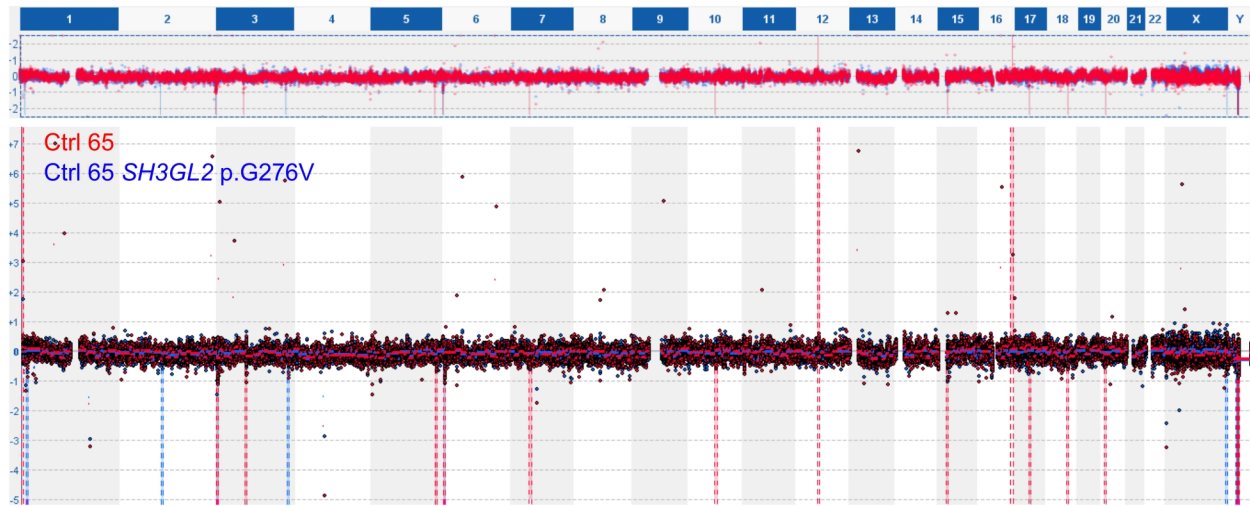

B

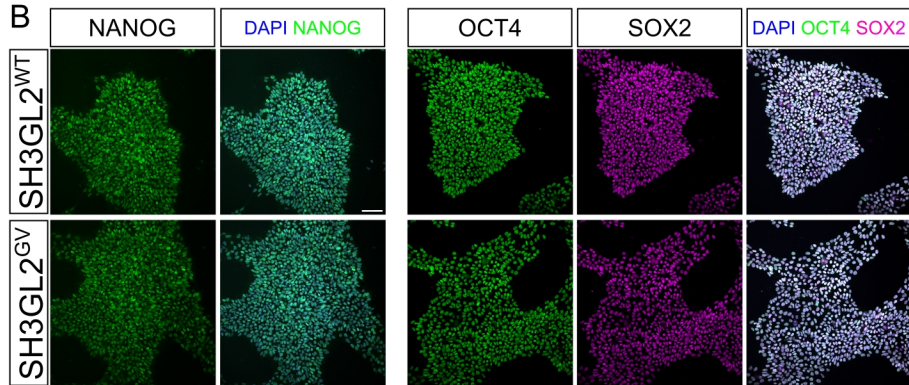

C

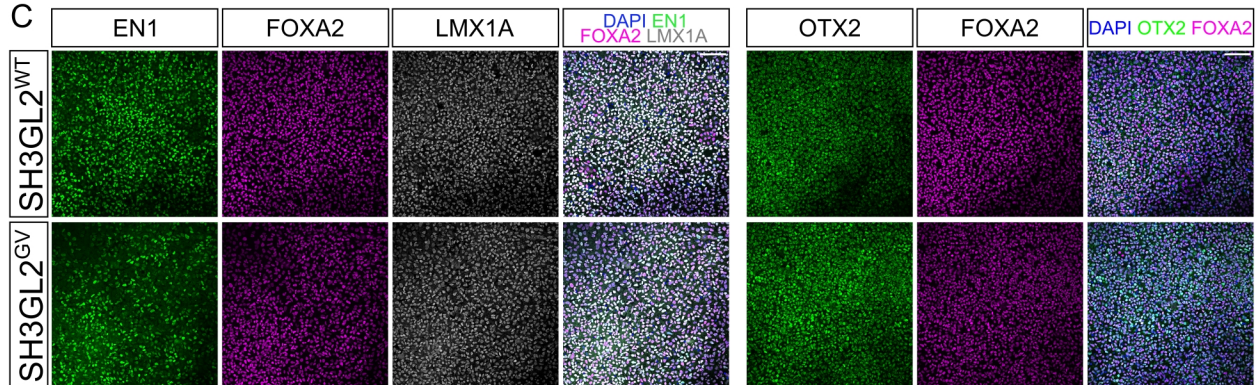

## 1 **Supplementary Figure Legends**

### 2 **Supplementary Figure 1 Ca<sup>2+</sup> channel agonist, Nefiracetam increases Ca<sup>2+</sup> influx in** 3 **synaptic boutons, related to Figure 1**

4 (A) Representative images of NMJs expressing GCaMP6m under a pan-neuronal driver (*nSyb-*  
5 *Gal4*). Animals were perfused in either HL3 solution supplemented with DMSO, NAS (100  
6  $\mu\text{M}$ ) and  $\text{CaCl}_2$  (2 mM) or in HL3, Nefiracetam (Nefi) (150  $\mu\text{M}$ ), NAS (100  $\mu\text{M}$ ) and  $\text{CaCl}_2$  (2  
7 mM).

8 (B) Quantification of GCaMP6m fluorescence upon Nefiracetam-induced calcium influx.  
9 Number of animals  $\geq 3$  per condition.

10

### 11 **Supplementary Figure 2 EndoA mutants do not show large conformational changes,** 12 **related to Figure 2**

13 We wondered if the differential association of the EndoA mutants with Dynamin could be  
14 explained by conformational differences, as speculated in literature (Chen et al., 2003; Zhang  
15 et al., 2012a).

16 (A) Coomassie staining of SDS-PAGE gel to visualize purified *Drosophila* EndoA<sup>WT</sup>,  
17 EndoA<sup>D265A</sup> and EndoA<sup>D265R</sup> after size exclusion chromatography (SEC). Expected size of  
18 monomeric EndoA proteins: ~41 KDa.

19 (B) Size Exclusion Chromatography coupled with Multiple Angle Light Scattering (SEC-  
20 MALS) chromatograms of purified *Drosophila* EndoA<sup>WT</sup>, EndoA<sup>D265A</sup> and EndoA<sup>D265R</sup> ran on  
21 a Superdex 200 increase 30/100 column show that the purified proteins are homogeneous and  
22 reveal that D265 mutations do not affect the ability of EndoA to dimerize. EndoA dimer peak  
23 elutes at ~12 ml. Expected size of dimeric EndoA: ~ 82 KDa. Experimentally measured sizes  
24 reported on graph. EndoA proteins chromatograms were normalized against the monomeric  
25 peak of BSA.

26 (C) Normalized absorbance spectra of purified *Drosophila* EndoA<sup>WT</sup>, EndoA<sup>D265A</sup> and  
27 EndoA<sup>D265R</sup> measured by Fourier Transform Infrared (FTIR) spectroscopy show no differences  
28 in secondary structure composition between mutant and wild type proteins. Wavenumbers  
29 between 1700-1600  $\text{cm}^{-1}$  correspond to the amide I peak, while the region between 1600-1500  
30  $\text{cm}^{-1}$  corresponds to the amide II peak.

31 (D) Average hydrodynamic radii of *Drosophila* EndoA<sup>WT</sup>, EndoA<sup>D265A</sup> and EndoA<sup>D265R</sup>  
32 measured by Dynamic Light Scattering (DLS) indicate no large differences between the tested  
33 proteins. Error bars represent mean  $\pm$  SEM.  $\geq 7$  measurements per protein from two  
34 independent experiments.

35 (E-F) To further explore the possibility of a conformational change, we performed Small Angle  
36 X-ray Scattering (SAXS) measurements. (E) Scattering profiles obtained from SAXS  
37 measurements of *Drosophila* EndoA<sup>WT</sup>, EndoA<sup>D265A</sup> and EndoA<sup>D265R</sup> are fully superimposable,  
38 indicating that no large conformational changes can be observed between EndoA<sup>WT</sup>,  
39 EndoA<sup>D265A</sup> and EndoA<sup>D265R</sup>.

40

41 (F) Kratky plots of *Drosophila* EndoA<sup>WT</sup>, EndoA<sup>D265A</sup> and EndoA<sup>D265R</sup>. Bell-shaped curves  
42 indicate that the analyzed proteins are compact and well folded.



43 We also wondered if the presence of  $\text{Ca}^{2+}$  would induce conformational changes. The scattering  
44 profile of EndoA<sup>WT</sup> in 20 mM MOPS +150 mM NaCl +1 mM DTT +5 % glycerol in the  
45 presence of 1 mM  $\text{CaCl}_2$  is similar to that of the EndoA<sup>WT</sup> in the absence of 1 mM  $\text{CaCl}_2$  (E).  
46 In addition, thermal stability (G-H) of EndoA<sup>WT</sup> with 1 mM  $\text{CaCl}_2$  or 1 mM EDTA are similar.  
47 (G) Thermal stability is displayed as Barycentric mean (BCM) of the intrinsic fluorescence  
48 signal of *Drosophila* EndoA<sup>WT</sup> plotted over a thermal ramp (20-95°C). Lines represents average  
49 of three measurements. Melting temperatures ( $T_m$ ) are calculated from the first derivative of  
50 the BCM.  $T_m$  for EndoA<sup>WT</sup> in 1 mM EDTA and 1 mM  $\text{CaCl}_2$  are respectively 51°C and 49.9°C.  
51 (H) Aggregation propensity is shown by Static light scattering (SLS) measured at 266 nm of  
52 *Drosophila* EndoA<sup>WT</sup> plotted over a thermal ramp (20-95°C). Lines represents average of three  
53 measurements.  
54 These results suggest that both mutating D265 or  $\text{Ca}^{2+}$  do not cause large conformational  
55 changes.

56

### 57 **Supplemental Figure 3 Expression of mutant EndoA gives rise to weak adult flies, related** 58 **to Figure 2**

59 (A) Western blot of control (*nSyb-Gal4/+*) and *endoA*<sup>-/-</sup> mutants expressing *endoA*<sup>WT</sup>,  
60 *endoA*<sup>D265A</sup> and *endoA*<sup>D265R</sup> under a pan-neuronal driver (*nSyb-Gal4*). Blots were probed with  
61 anti-EndoA and anti-GAPDH antibodies. (A') Quantification of EndoA signal intensity relative  
62 to GAPDH intensity. Error bars represent mean ± SEM; statistical significance calculated with  
63 an ordinary one-way ANOVA with Tukey's multiple comparison test: ns, not significant.  
64 Experiment performed in three independent biological replicates.

65 (B) Table indicating neuronal expression (*nSyb-Gal4*) of *endoA*<sup>WT</sup>, *endoA*<sup>D265A</sup> and *endoA*<sup>D265R</sup>  
66 in *endoA*<sup>-/-</sup> mutants. 'A' and 'P' indicate survival to 'adult stage' and 'pupa stage', respectively.  
67 (C) Representative images of adult *endoA*<sup>-/-</sup> *Drosophila* expressing *endoA*<sup>WT</sup>, *endoA*<sup>D265A</sup>, and  
68 *endoA*<sup>D265R</sup> under the control of the pan-neuronal driver *nSyb-Gal4*. *endoA*<sup>D265A</sup> and *endoA*<sup>D265R</sup>  
69 adult flies have marked phenotype of non-expanded wings, days after eclosion. Scale bar: 1  
70 mm. (C') Quantification of percentage of adult *Drosophila* with non-expanded wings 24 hours  
71 after eclosion across the three genotypes. Statistical significance calculated with an ordinary  
72 one-way ANOVA with Tukey's multiple comparison test: \*\*\*  $P < 0.001$ ,  $n \geq 51$  animals per  
73 genotype across 4 independent experiments.

74

### 75 **Supplementary Figure 4 Nanoscale localization of EndoA mutants is unchanged by** 76 **synaptic activity, related to figure 4**

77 (A-A''') Transgenic *endoA*<sup>-/-</sup> larvae expressing *endoA*<sup>WT::mEos3.1</sup>, *endoA*<sup>D265A::mEos3.1</sup> or  
78 *endoA*<sup>D265R::mEos3.1</sup> (under the pan-neuronal driver *nSyb-Gal4*) were imaged using single  
79 molecule localization photoactivated localization microscopy (PALM) at 20 Hz. Low  
80 resolution images of NMJ (A) and zoomed in individual bouton (A') expressing  
81 *endoA*<sup>WT::mEos3.1</sup>. Scale bar: 2 μm. (A'') Single molecule localization clusters of the same  
82 zoomed in bouton obtained post-processing from photo-converted movie. (A''') Cluster map  
83 colour-coded for cluster size and density distribution of EndoA<sup>::mEos3.1</sup> generated by density-

84 based spatial clustering of applications with noise (DBSCAN) analysis. Arrowhead indicate  
85 EndoA nanodomains. Fluorescence intensity shown using indicated scale (0-65535).

86 (B-D) Relative frequency distribution of cluster area of of *endoA*<sup>WT::mEos3.1</sup>, *endoA*<sup>D265A::mEos3.1</sup>  
87 and *endoA*<sup>D265R::mEos3.1</sup> in non-stimulated (30 min incubation in HL3, Nefi (10  $\mu$ M) and NAS  
88 (100  $\mu$ M) solution and stimulated conditions (30 min incubation in HL3 solution containing  
89 Nefi (10  $\mu$ M), NAS (100  $\mu$ M) and CaCl<sub>2</sub> (1 mM)). Error bars represent mean  $\pm$  SEM; n  $\geq$  5  
90 larvae (10 NMJs) per genotype.

91 (B'-D') Quantification of average clustered detections per unit bouton area in the different  
92 genotypes in non-stimulated and stimulated conditions. Error bars represent mean  $\pm$  SEM;  
93 statistical significance was calculated with an student *t*-test two-tailed unpaired distribution: \*\*  
94 *P* < 0.01, ns, not significant, n  $\geq$  5 larvae (20 NMJs) per genotype.  
95

### 96 **Supplementary Figure 5 Ca<sup>2+</sup> influx changes the mobility of EndoA, related to Figure 4**

97 (A-A''') Representative low resolution image of transgenic *endoA*<sup>-/-</sup> larvae expressing  
98 *endoA*<sup>::mEos3.1</sup> (under the pan-neuronal driver *nSyb-Gal4*) (A), super-resolved average intensity  
99 map (A'), super-resolved diffusion coefficient map (A'') and super-resolved trajectories map  
100 (A'''). Fluorescence intensities shown using indicated scale in A' and A''. (B, B') Show  
101 trajectories of single EndoA molecules classified as immobile and mobile population.

102 (C-C') Low resolution image of a zoomed in bouton (C) and sptPALM super-resolved average  
103 intensity map (C') displaying clear accumulation of EndoA<sup>::mEos3.1</sup> in nanodomains (arrowheads).  
104 Scale bar: 2  $\mu$ m.

105 (D-F) Change in MSD ( $\mu$ m<sup>2</sup>) (D, E, F), area under MSD curves ( $\mu$ m<sup>2</sup>s) (D', E', F'), relative  
106 frequency distribution of diffusion coefficients (D'', E'', F'') and ratio of mobile to immobile  
107 population (D''', E''', F''') in *endoA*<sup>-/-</sup> larvae expressing *endoA*<sup>WT::mEos3.1</sup>, *endoA*<sup>D265A::mEos3.1</sup>  
108 and *endoA*<sup>D265R::mEos3.1</sup> (under control of *nSyb-Gal4*) in non-stimulated and stimulated  
109 conditions. The increase in mobility of EndoA in *endoA*<sup>WT::mEos3.1</sup> due to Ca<sup>2+</sup> is absent in  
110 *endoA*<sup>D265A::mEos3.1</sup> and *endoA*<sup>D265R::mEos3.1</sup>. Error bars represent mean  $\pm$  SEM; statistical  
111 significance was calculated with an student *t*-test two-tailed unpaired distribution: \*\*\* *P* <  
112 0.001, ns, not significant, n  $\geq$  5 larvae (20 NMJs) per genotype.  
113  
114

### 115 **Supplementary Figure 6 SH3GL2 coding variant does not affect ENDOA1 conformation 116 nor endocytosis, related to Figure 6**

117 (A-B) To exclude that the candidate PD-causing variant affects ENDOA1 conformation, we  
118 purified recombinant ENDOA1<sup>WT</sup> and ENDOA1<sup>G276V</sup> and analyzed them by SAXS. The  
119 scattering profiles (A) of Human ENDOA1<sup>WT</sup> (in the absence and presence of Ca<sup>2+</sup>) and  
120 ENDOA1<sup>G276V</sup> are superimposable, excluding large conformational rearrangements in  
121 ENDOA1<sup>G276V</sup>. The scattering profile of ENDOA1<sup>WT</sup> in the absence of Ca<sup>2+</sup> shows a small  
122 tendency for radiation-induced aggregation under the conditions used. (B) The Kratky plots of  
123 Human ENDOA1<sup>WT</sup> (in the absence and presence of Ca<sup>2+</sup>), ENDOA1<sup>G276V</sup> in 20 mM MOPS  
124 +150 mM NaCl +1 mM DTT +5 % glycerol confirmed that the proteins were well folded.

125 (C) Western blot of *endoA*<sup>-/-</sup> mutants expressing *SH3GL2*<sup>WT</sup> and *SH3GL2*<sup>G276V</sup> under a pan-  
126 neuronal driver (*nSyb-Gal4*). Blots were probed with anti-ENDOA1 and anti-GAPDH

127 antibodies. (C') Quantification of ENDOA1 signal intensity relative to GAPDH intensity. Error  
128 bars represent mean  $\pm$  SEM; statistical significance calculated with an ordinary one-way  
129 ANOVA with Tukey's multiple comparison test: ns, not significant. Experiment performed in  
130 three independent biological replicates.

131 (D) Representative images of boutons loaded (1 min, 90 mM KCl, 1.5 mM CaCl<sub>2</sub>) with FM 1-  
132 43 (4  $\mu$ M) and quantification (D') of the following genotypes: control (*nSyb-Gal4/+*), *endoA*<sup>-/-</sup>  
133 animals expressing *SH3GL2*<sup>WT</sup> and *SH3GL2*<sup>G276V</sup> under the control of *nSyb-Gal4*. Scale bar: 5  
134  $\mu$ m. Statistical significance calculated with an ordinary one-way ANOVA with Tukey's  
135 multiple comparison test: ns, not significant, n  $\geq$  7 larvae (28 NMJs) per genotype.

136

137 **Supplementary Figure 7 Characterization of iPSC knock-in line and floor plate neural**  
138 **progenitors, related to Figure 7**

139 (A) CGH array of the edited iPSCs line showing no chromosomal aberrations following gene  
140 editing.

141 (B) representative maximum projection confocal images of control and gene edited  
142 (*SH3GL2*<sup>GV</sup>) iPSCs stained for the pluripotency markers NANOG, OCT4 and SOX2. Scale  
143 bar: 150  $\mu$ m.

144 (C) Representative maximum projection confocal images of floor plate progenitors (day 16)  
145 stained for the indicated floor plate markers to assess the degree of ventralization. Scale bar:  
146 100  $\mu$ m.

147

148 **Supplemental Movie 1 *In vivo* single particle tracking of EndoA, related to Figure 4**

149 EndoA<sup>mEos3.1</sup> single molecule imaging at the motor nerve terminal. Movie acquired at 20 Hz.  
150 Scale bar: 5  $\mu$ m.

151
